# Supplementary material for: Water extract of ginseng alleviates parkinsonism in MPTP–induced Parkinson’s disease mice
Source: PubMed Central journal article supplement (PMC11414931; doi:10.1371/journal.pone.0296424), 2024-09-20

the manuscript's main figures

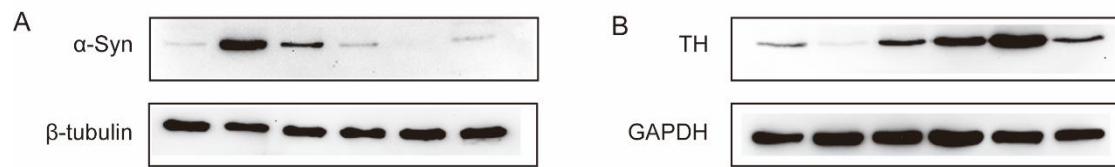

Original image of Western Blot

Original blot of  $\alpha$ -Syn

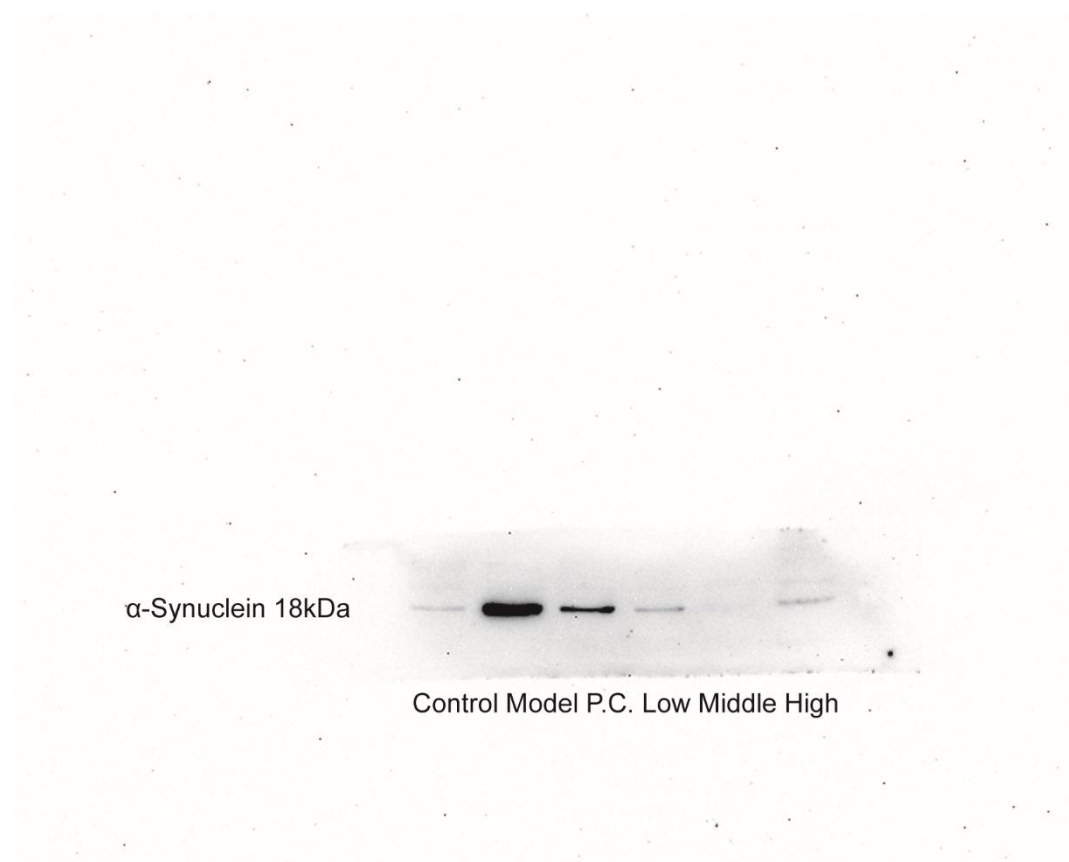

Supplemental figures of  $\alpha$ -Syn

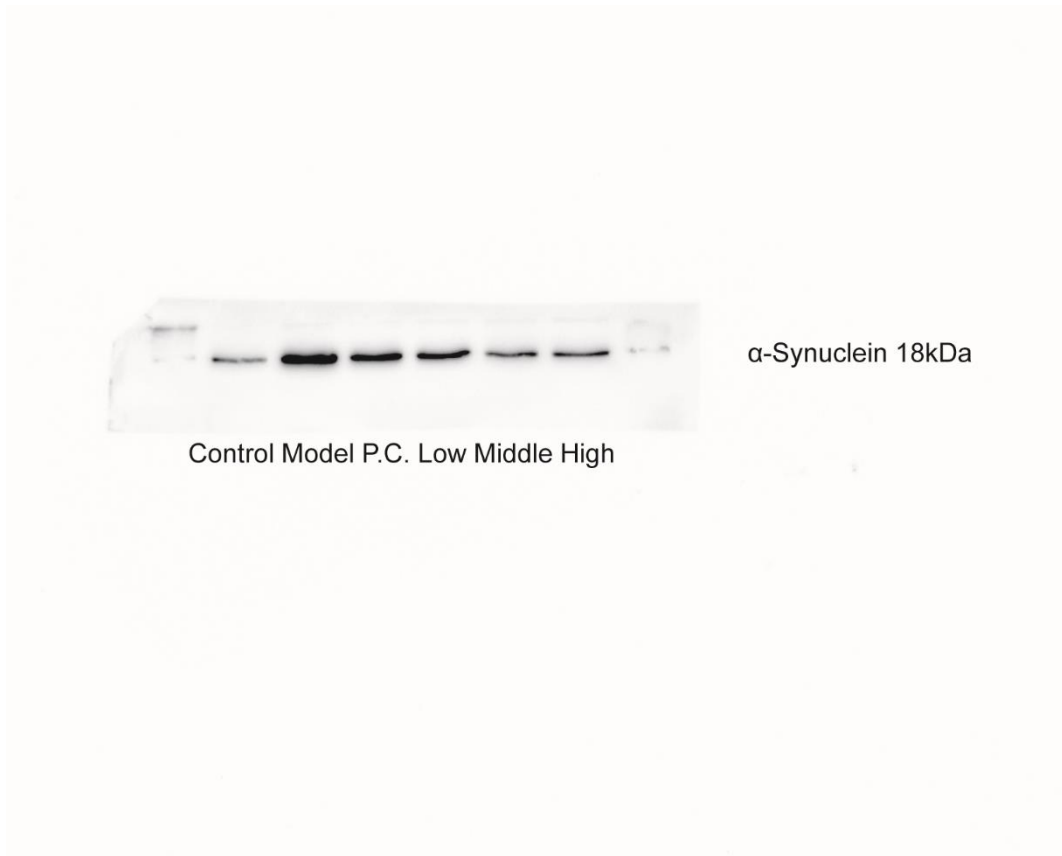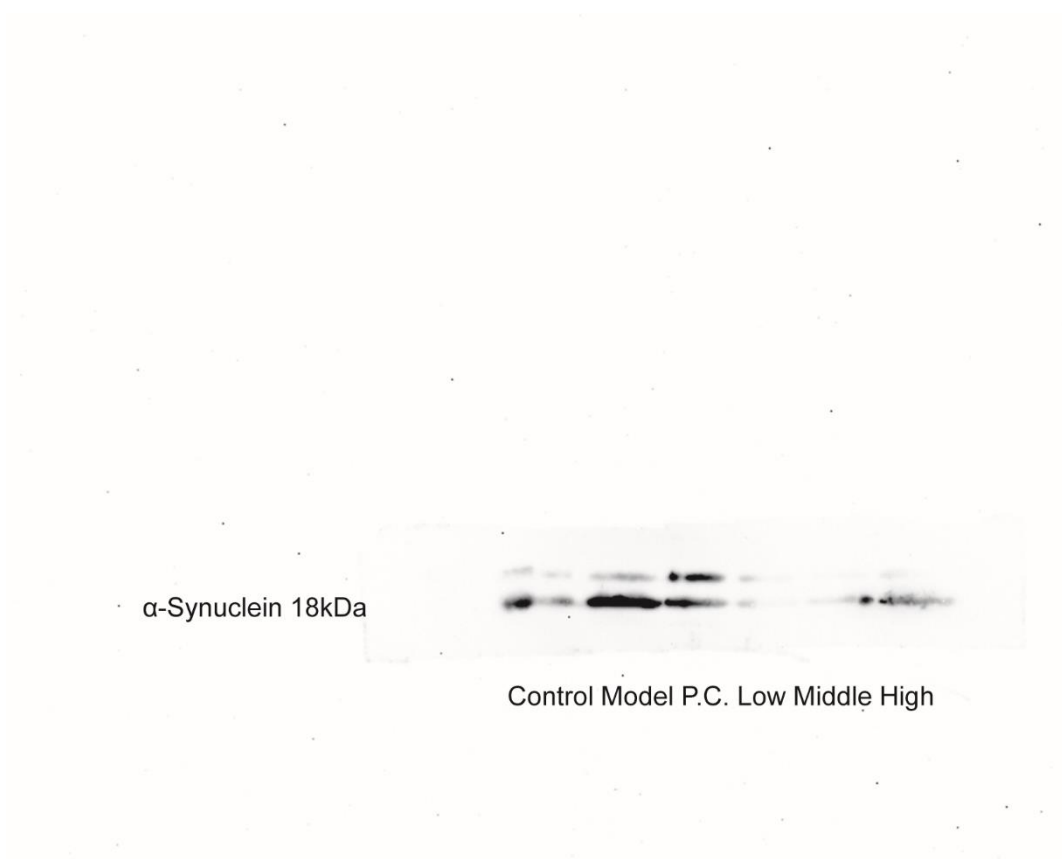

Original blot of  $\beta$ -Tubulin

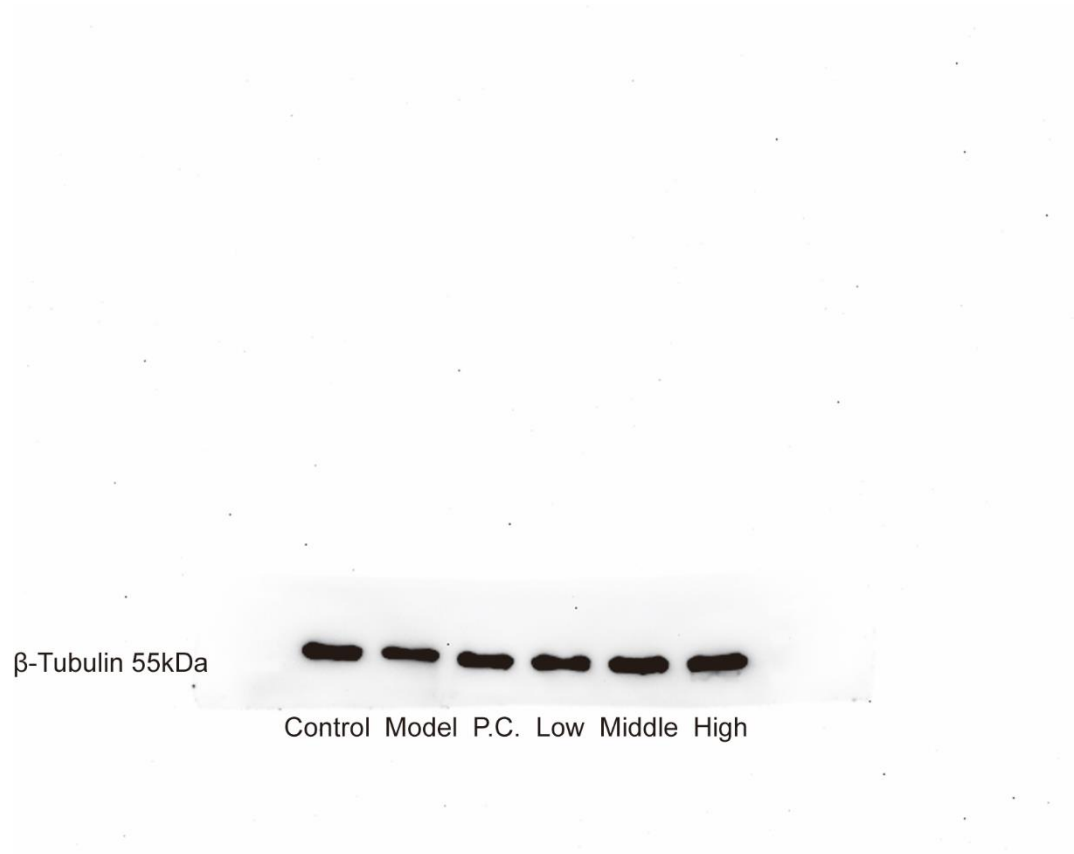

Supplemental figures of  $\beta$ -Tubulin

$\beta$ -Tubulin 55kDa

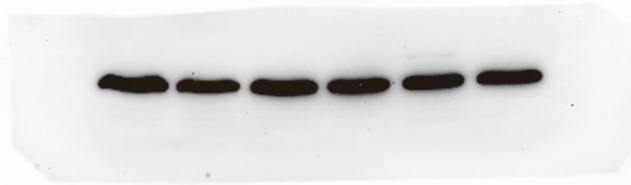

Control Model P.C. Low Middle High

$\beta$ -Tubulin 55kDa

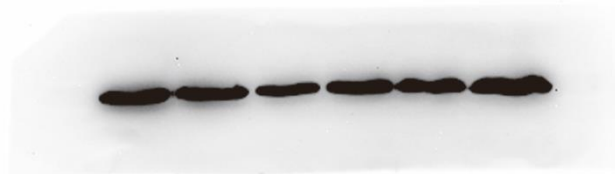

Control Model P.C. Low Middle High

Original blot of TH

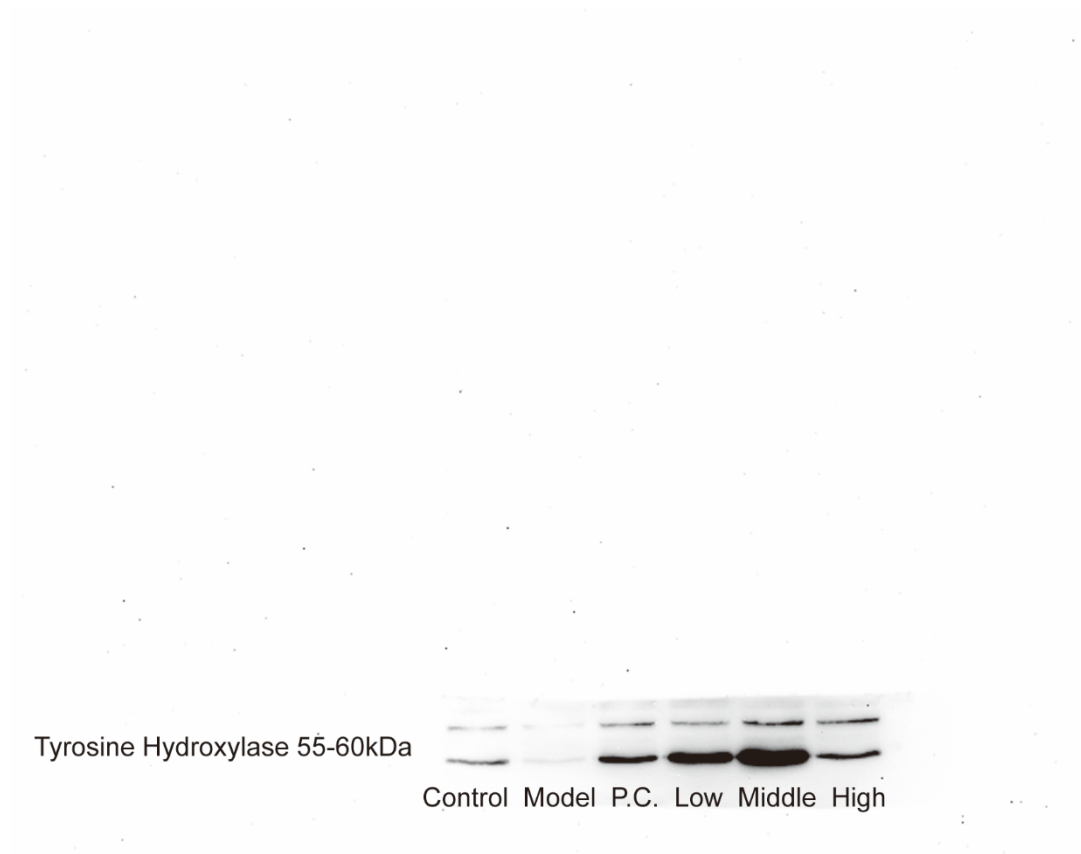

Supplemental figures of TH

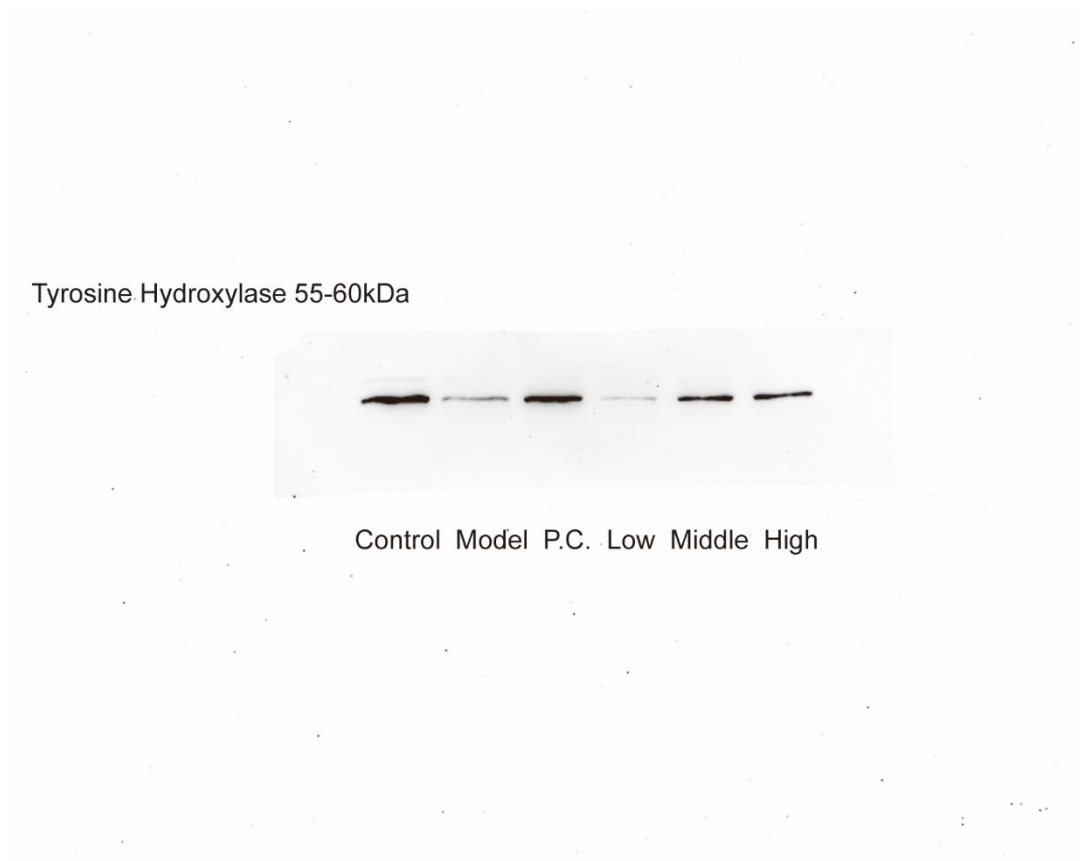

Tyrosine Hydroxylase 55-60kDa

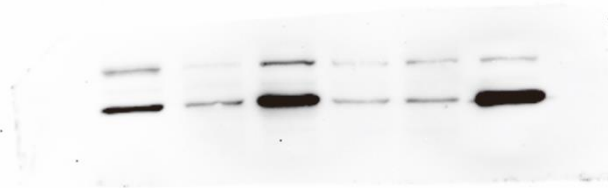

Control Model P.C. Low Middle High

Original blot of GAPDH

GAPDH 36kDa

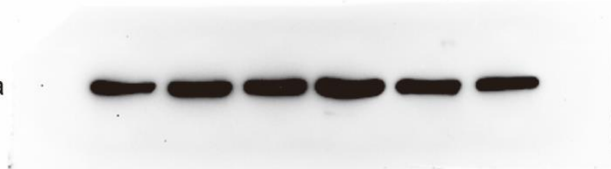

Control Model P.C. Low Middle High

Supplemental figures of TH

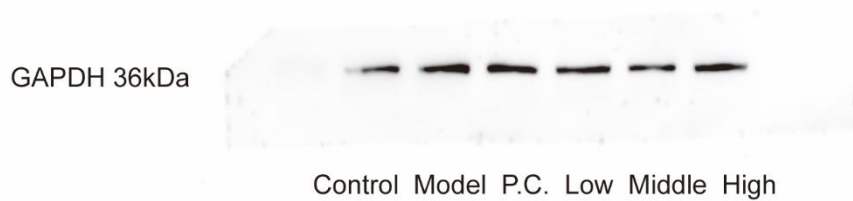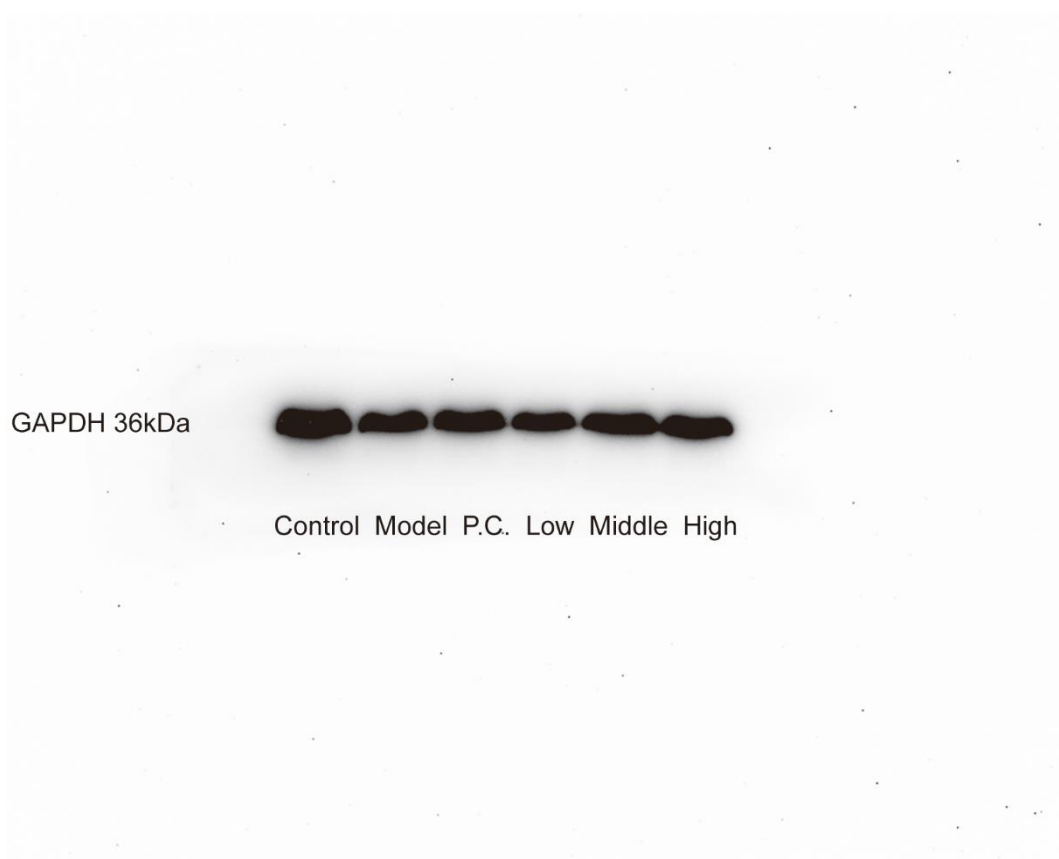

Supplement: pone.0296424.s001.pdf [file pone.0296424.s001.pdf]
