# Supplementary material for: Water extract of ginseng alleviates parkinsonism in MPTP–induced Parkinson’s disease mice
Source: PubMed Central journal article supplement (PMC11414931; doi:10.1371/journal.pone.0296424), 2024-09-20
Supplement: pone.0296424.s003.pdf [file pone.0296424.s003.pdf]

Water extract of ginseng alleviates parkinsonism in MPTP-induced Parkinson's disease mice  
--Manuscript Draft--

|                               |                                                                                                                                                                                                                                                                                                                                                                                                                                                                                                                                                                                                                                                                                                                                                                                                                                                                                                                                                                                                                                                                                                                                                                                                                                                                                                                            |
|-------------------------------|----------------------------------------------------------------------------------------------------------------------------------------------------------------------------------------------------------------------------------------------------------------------------------------------------------------------------------------------------------------------------------------------------------------------------------------------------------------------------------------------------------------------------------------------------------------------------------------------------------------------------------------------------------------------------------------------------------------------------------------------------------------------------------------------------------------------------------------------------------------------------------------------------------------------------------------------------------------------------------------------------------------------------------------------------------------------------------------------------------------------------------------------------------------------------------------------------------------------------------------------------------------------------------------------------------------------------|
| <b>Manuscript Number:</b>     | PONE-D-23-02610R1                                                                                                                                                                                                                                                                                                                                                                                                                                                                                                                                                                                                                                                                                                                                                                                                                                                                                                                                                                                                                                                                                                                                                                                                                                                                                                          |
| <b>Article Type:</b>          | Research Article                                                                                                                                                                                                                                                                                                                                                                                                                                                                                                                                                                                                                                                                                                                                                                                                                                                                                                                                                                                                                                                                                                                                                                                                                                                                                                           |
| <b>Full Title:</b>            | Water extract of ginseng alleviates parkinsonism in MPTP-induced Parkinson's disease mice                                                                                                                                                                                                                                                                                                                                                                                                                                                                                                                                                                                                                                                                                                                                                                                                                                                                                                                                                                                                                                                                                                                                                                                                                                  |
| <b>Short Title:</b>           | Effect of Water extract of ginseng on Parkinson's disease                                                                                                                                                                                                                                                                                                                                                                                                                                                                                                                                                                                                                                                                                                                                                                                                                                                                                                                                                                                                                                                                                                                                                                                                                                                                  |
| <b>Corresponding Author:</b>  | Yu Zhao, Ph.D.<br>Changchun University of Traditional Chinese Medicine<br>Changchun, CHINA                                                                                                                                                                                                                                                                                                                                                                                                                                                                                                                                                                                                                                                                                                                                                                                                                                                                                                                                                                                                                                                                                                                                                                                                                                 |
| <b>Keywords:</b>              | Parkinson's disease, water extract of ginseng, neuroprotection, low-temperature extraction, gut microbiota                                                                                                                                                                                                                                                                                                                                                                                                                                                                                                                                                                                                                                                                                                                                                                                                                                                                                                                                                                                                                                                                                                                                                                                                                 |
| <b>Abstract:</b>              | In this study, we investigated the neuroprotective effect of a water extract of ginseng (WEG) obtained via low-temperature extraction of the brain of mice with Parkinson's disease (PD) and the ameliorative effect on the damaged intestinal system for the treatment of dyskinesia in PD mice. MPTP (1-methyl-4-phenyl-1,2,3,6-tetrahydropyridine) was injected intraperitoneally into male C57BL/6 mice to establish a PD model, and WEG was given via gavage. The results indicated that WEG could protect the damaged neuronal cells of the mice brain, inhibit the aggregation of $\alpha$ -synuclein ( $\alpha$ -Syn) in the brain, and increase the positive expression rate of tyrosine hydroxylase (TH). WEG significantly improved intestinal damage and regulated intestinal disorders. WEG intervention increased the levels of beneficial bacteria, such as Lactobacillus, and normalized the abundance and diversity of colonies in the intestine of mice. Our results suggested that WEG protected neurons in the brain of PD mice via inhibiting the aggregation of $\alpha$ -Syn in the brain and increasing the positive expression level of TH in the brain. WEG regulated the gut microbiota of mice, improved the behavioral disorders of PD mice, and offered some therapeutic effects on PD mice. |
| <b>Order of Authors:</b>      | Ning Xu<br>Shuyang Xing<br>Jie Li<br>Bo Pang<br>Meichen Liu<br>Meiling Fan<br>Yu Zhao                                                                                                                                                                                                                                                                                                                                                                                                                                                                                                                                                                                                                                                                                                                                                                                                                                                                                                                                                                                                                                                                                                                                                                                                                                      |
| <b>Response to Reviewers:</b> | Reviewer Comments:<br><br>Reviewer 1<br><br>In this study the authors used a low-temperature extraction technique to obtain WEG with high retention of active ingredients. The authors demonstrated that WEG could repair intestinal damage and improve gut microbiota dysbiosis in PD mice. The authors also demonstrated that WEG could significantly improve behavioral functions and inhibit the accumulation of $\alpha$ -Syn in the brain via regulating the level of TH in the brain, thus exerting neuroprotective effects in PD mice.<br>This study provides a new approach to the pharmacological treatment of PD, further supports the hypothesis that the pathogenesis of PD is related to the gut, and offers a research basis for whether WEG may be a suitable treatment for other degenerative diseases.<br><br>Reviewer 2                                                                                                                                                                                                                                                                                                                                                                                                                                                                                 |

In this study, they explored the neuroprotective effects of water extract of ginseng (WEG) on the brains of Parkinson's disease (PD) mice and its ability to improve their damaged intestinal system, addressing dyskinesia. Their data showed that WEG protected damaged neuronal cells, inhibited  $\alpha$ -synuclein aggregation, and increased tyrosine hydroxylase expression in the mice's brains. WEG also significantly improved intestinal damage, regulated gut disorders, increased beneficial bacteria like Lactobacillus, and restored bacterial abundance and diversity. Overall, WEG protected neurons in PD mice's brains, regulated gut microbiota, improved behavioral disorders, and offered therapeutic effects for PD mice.

The article has some innovativeness but has the following issues:

Comment 1:

The authors included an analysis of the gut microbiome as an indicator when exploring the neuroprotective effects of WEG on PD, and indeed, the relationship between gut microbiome and PD is a new and broad research direction. However, the authors did not explicitly state the reason for including the gut microbiome analysis in the introduction. In fact, this indicator makes the article appear loose and unfocused. It is confusing whether WEG protects neurons because of its effects on the gut microbiome, or if it affects the gut microbiome because of its neuroprotective properties. It would be better to directly analyze the mechanisms affecting neurons instead.

Authors' responses:

We have included the following in the introduction by reviewing references [10-12] and [31-32].

The latest research has found that PD may originate in the intestines. Since abnormal  $\alpha$ -Syn first appears in intestinal neurons before the onset of PD, intestinal dysbacteriosis is most likely related to the onset of PD disease [10]. Intestinal microorganisms act on the central nervous system through metabolites, neurotransmitters and cytokines secreted by immune cells, regulating brain-gut axis interactions [11], and the imbalance of the gut microbiota of Parkinson's patients may lead to  $\alpha$ -Syn misfolding, from the intestinal nerves to the brain and brainstem, which in turn leads to brain dopaminergic neuronal damage [12].

At the same time, ginsenosides also have a potential therapeutic effect on intestinal microbiota dysbiosis. Ginsenoside Rb1 significantly changed the composition of gut microbiota in hyperglycemic mice and increased the abundance of mucin-degrading bacteria Akkermansia spp. [31]. Ginsenoside Rk3 intake caused significant changes in the intestinal flora of mice, enriching Bacteroides, Alloprevotella and Blautia, significantly reducing the Firmicutes/Bacteroidetes ratio, effectively improving intestinal dysbacteriosis and reducing the inflammatory response of mice [32].

[10]Zhang Y, Xu S, Qian Y. (2023). Sodium butyrate ameliorates gut dysfunction and motor deficits in a mouse model of Parkinson's disease by regulating gut microbiota [J]. Frontiers in Aging Neuroscience, 151099018-1099018.

<https://doi.org/10.3389/FNAGI.2023.1099018>

[11]Mulak Agata, Bonaz Bruno. (2015). Brain-gut-microbiota axis in Parkinson's disease.[J]. World journal of gastroenterology, 21(37), 10609-20.

<https://doi.org/10.3748/wjg.v21.i37.10609>

[12]Houser Madelyn C; Tansey Malú G. (2017). The gut-brain axis: is intestinal inflammation a silent driver of Parkinson's disease pathogenesis?. NPJ Parkinson's disease, 3(12), 3. <https://doi.org/10.1038/s41531-016-0002-0>

[31]Yang X, Dong B, An L, Zhang Q, Chen Y, Wang H. (2021). Ginsenoside Rb1 ameliorates Glycemic Disorder in Mice with High Fat Diet-Induced Obesity via Regulating Gut Microbiota and Amino Acid Metabolism. Frontiers in Pharmacology, 12756491-756491. <https://doi.org/10.3389/FPHAR.2021.756491>

[32]Bai X, Fu R, Duan Z, Wang P, Zhu Ch. (2021). Ginsenoside Rk3 alleviates gut microbiota dysbiosis and colonic inflammation in antibiotic-treated mice. Food Research International, 146110465-110465. <https://doi.org/10.1016/J.FOODRES.2021.110465>

Comment 2:

What are the specific doses of WEG in the low, middle, and high groups in the article, and what is the basis for these doses? The article mentions oral administration of WEG from day 28 to 56. How was this application period determined? In pharmacological experiments, the establishment of dosage and timing requires sufficient justification.

Authors' responses:  
According to the records in Pharmacopoeia of the People's Republic of China 2020, the daily oral dose of ginseng for human should be 3–9 g, and the corresponding administration groups of mice were categorized into low (0.013g/kg body weight per day), middle (0.026g/kg body weight per day), and high groups (0.039g/kg body weight per day). The MPTP-induced chronic injury model is more consistent with Parkinson's disease, and it takes frequent, high-dose injections of MPTP to induce a large amount of DA deficiency in mice, but this deficiency is usually reversed within 3-6 months. We rationalized the modeling time to 28 days based on the pre-experiment after consulting the literature, and since DA deficits may be reversed at 3-6 months, we aligned the drug administration time with the modeling time to ensure that the experimental improvement originated from the drug and not from automatic recovery of DA in the organism.

Comment 3:  
In Figure 6, the IHC staining of WEG is shown at x400 magnification, which is quite large. Are there images available at x100 or x50 magnification? This would provide clearer comparisons.

Authors' responses:  
We have changed Figures 5 and 6 to x200x images to ensure that the images were taken from the same location and can be compared more clearly.

Comment 4:  
Please consider streamlining the article, particularly the introduction and discussion sections. Any redundant content can be removed.

Authors' responses:  
We have revised the introductory section and marked the changes in yellow.

Reviewer 3  
The study focused on the neuroprotective effects of water extract of ginseng (WEG) on a mouse model of Parkinson's Disease (PD) induced by MPTP (1-methyl-4-phenyl-1,2,3,6-tetrahydropyridine). The authors presented significant results indicating that WEG could ameliorate MPTP-induced PD-like symptoms, improve intestinal damage, reduce  $\alpha$ -Syn accumulation, increase TH level, and rectify gut microbiota dysbiosis. The study provides valuable insights into the potential of WEG as a pharmacological treatment for PD. However, several points could be further clarified or improved.

Comment 1:  
The authors mentioned that WEG extraction was performed under mild conditions of low temperature and water extraction. It would be interesting to compare these results with those obtained under different conditions. More discussion on the extraction technique might enhance the understanding of the effects of extraction conditions on the efficacy of WEG.

Authors' responses:  
We appreciate the reviewers' comment, but the discussion of our manuscript focuses on the pathological study of WEG to improve PD mice. For different extraction conditions is not the main statement of this manuscript.

Comment 2:  
Although the authors suggest that WEG plays a role in resisting PD progression, the exact mechanisms by which WEG exerts its effects are not completely elucidated. Further exploration of this could provide a more detailed understanding of the mechanisms underlying the effects of WEG.

Authors' responses:  
We thank the reviewers for their comments on the mechanism by which WEG exerts its effect, which is what we are most interested in in the research work of this paper. We have several speculations about this, which are also likely to be the focus of our research in the next work plan.

- 1) WEG ameliorates the pathogenesis of PD by repressing certain mitochondrial apoptosis-related genes.
- 2) Anti-oxidant effect: WEG may inhibit the levels of certain pro-oxidant factors, thus acting as a neuroprotective agent in the brain.
- 3) Gene-level effects: PD occurs as a result of multi-gene, multi-step, mutations, and mutations in different genes with different intensities form different tumors. The addition

|                                                                                                                                                                                                                                                                                                                                                                                                                                                                                                     |                                                                                                                                                                                                                                                                                                                                                                                                                                                                                                                                                                                                                                                                                                                                                                                                                                                                                                                                                                                                                                                                                                                                |
|-----------------------------------------------------------------------------------------------------------------------------------------------------------------------------------------------------------------------------------------------------------------------------------------------------------------------------------------------------------------------------------------------------------------------------------------------------------------------------------------------------|--------------------------------------------------------------------------------------------------------------------------------------------------------------------------------------------------------------------------------------------------------------------------------------------------------------------------------------------------------------------------------------------------------------------------------------------------------------------------------------------------------------------------------------------------------------------------------------------------------------------------------------------------------------------------------------------------------------------------------------------------------------------------------------------------------------------------------------------------------------------------------------------------------------------------------------------------------------------------------------------------------------------------------------------------------------------------------------------------------------------------------|
|                                                                                                                                                                                                                                                                                                                                                                                                                                                                                                     | <p>of WEG may have altered the structure of DNA, the genetic material of mice brain nerve cells, reversing the genetic characteristics of brain nerve cells and thus exerting an inhibitory effect on parkinsonism.</p> <p>Comment 3:<br/>It was mentioned that the high dose of WEG improved PD and also affected the gut microbiota of the mice. More information or discussion on the correlation between dosage and effects would be beneficial.<br/>Authors' responses:<br/>We discussed this and revised the manuscript.</p> <p>Comment 4:<br/>For figure 5 and figure 6, a low magnification overview is needed for the structure of the brain to ensure the zoom in image was taken from the same location.<br/>Authors' responses:<br/>We have changed Figures 5 and 6 to x200x images to ensure that the images were taken from the same location and can be compared more clearly.</p> <p>Comment 5:<br/>For figure 7B, what's the top band of GAPDH? GAPDH should only have one band.<br/>Authors' responses:<br/>The GAPDH primary antibody has been reselected in Figure 7B. We have modified the figure 7B.</p> |
| <b>Additional Information:</b>                                                                                                                                                                                                                                                                                                                                                                                                                                                                      |                                                                                                                                                                                                                                                                                                                                                                                                                                                                                                                                                                                                                                                                                                                                                                                                                                                                                                                                                                                                                                                                                                                                |
| <b>Question</b>                                                                                                                                                                                                                                                                                                                                                                                                                                                                                     | <b>Response</b>                                                                                                                                                                                                                                                                                                                                                                                                                                                                                                                                                                                                                                                                                                                                                                                                                                                                                                                                                                                                                                                                                                                |
| <p><b>Financial Disclosure</b></p> <p>Enter a financial disclosure statement that describes the sources of funding for the work included in this submission. Review the <a href="#">submission guidelines</a> for detailed requirements. View published research articles from <a href="#">PLOS ONE</a> for specific examples.</p> <p>This statement is required for submission and <b>will appear in the published article</b> if the submission is accepted. Please make sure it is accurate.</p> | <p>The funders had no role in study design, data collection and analysis, decision to publish, or preparation of the manuscript.</p>                                                                                                                                                                                                                                                                                                                                                                                                                                                                                                                                                                                                                                                                                                                                                                                                                                                                                                                                                                                           |

**Unfunded studies**

Enter: *The author(s) received no specific funding for this work.*

**Funded studies**

Enter a statement with the following details:

- Initials of the authors who received each award
- Grant numbers awarded to each author
- The full name of each funder
- URL of each funder website
- Did the sponsors or funders play any role in the study design, data collection and analysis, decision to publish, or preparation of the manuscript?
- **NO** - Include this sentence at the end of your statement: *The funders had no role in study design, data collection and analysis, decision to publish, or preparation of the manuscript.*
- **YES** - Specify the role(s) played.

\* typeset

**Competing Interests**

Use the instructions below to enter a competing interest statement for this submission. On behalf of all authors, disclose any [competing interests](#) that could be perceived to bias this work—acknowledging all financial support and any other relevant financial or non-financial competing interests.

This statement is **required** for submission and **will appear in the published article** if the submission is accepted. Please make sure it is accurate and that any funding sources listed in your Funding Information later in the submission form are also declared in your Financial Disclosure statement.

View published research articles from [PLOS ONE](#) for specific examples.

The authors have declared that no competing interests exist.

**NO authors have competing interests**

Enter: *The authors have declared that no competing interests exist.*

**Authors with competing interests**

Enter competing interest details beginning with this statement:

*I have read the journal's policy and the authors of this manuscript have the following competing interests: [insert competing interests here]*

\* typeset

**Ethics Statement**

Enter an ethics statement for this submission. This statement is required if the study involved:

- Human participants
- Human specimens or tissue
- Vertebrate animals or cephalopods
- Vertebrate embryos or tissues
- Field research

Write "N/A" if the submission does not require an ethics statement.

General guidance is provided below. Consult the [submission guidelines](#) for detailed instructions. **Make sure that all information entered here is included in the Methods section of the manuscript.**

Institutional Animal Care and Use Committee (IACUC), Experimental Animal Ethics Committee of Changchun University of Chinese Medicine  
Approval number, 2022632  
Euthanasia after carbon dioxide anesthesia

**Format for specific study types**

**Human Subject Research (involving human participants and/or tissue)**

- Give the name of the institutional review board or ethics committee that approved the study
- Include the approval number and/or a statement indicating approval of this research
- Indicate the form of consent obtained (written/oral) or the reason that consent was not obtained (e.g. the data were analyzed anonymously)

**Animal Research (involving vertebrate animals, embryos or tissues)**

- Provide the name of the Institutional Animal Care and Use Committee (IACUC) or other relevant ethics board that reviewed the study protocol, and indicate whether they approved this research or granted a formal waiver of ethical approval
- Include an approval number if one was obtained
- If the study involved *non-human primates*, add *additional details* about animal welfare and steps taken to ameliorate suffering
- If anesthesia, euthanasia, or any kind of animal sacrifice is part of the study, include briefly which substances and/or methods were applied

**Field Research**

Include the following details if this study involves the collection of plant, animal, or other materials from a natural setting:

- Field permit number
- Name of the institution or relevant body that granted permission

**Data Availability**

Authors are required to make all data underlying the findings described fully available, without restriction, and from the time of publication. PLOS allows rare exceptions to address legal and ethical concerns. See the [PLOS Data Policy](#) and [FAQ](#) for detailed information.

Yes - all data are fully available without restriction

A Data Availability Statement describing where the data can be found is required at submission. Your answers to this question constitute the Data Availability Statement and **will be published in the article**, if accepted.

**Important:** Stating 'data available on request from the author' is not sufficient. If your data are only available upon request, select 'No' for the first question and explain your exceptional situation in the text box.

Do the authors confirm that all data underlying the findings described in their manuscript are fully available without restriction?

**Describe where the data may be found in full sentences. If you are copying our sample text, replace any instances of XXX with the appropriate details.**

- If the data are **held or will be held in a public repository**, include URLs, accession numbers or DOIs. If this information will only be available after acceptance, indicate this by ticking the box below. For example: *All XXX files are available from the XXX database (accession number(s) XXX, XXX).*
- If the data are all contained **within the manuscript and/or Supporting Information files**, enter the following: *All relevant data are within the manuscript and its Supporting Information files.*
- If neither of these applies but you are able to provide **details of access elsewhere**, with or without limitations, please do so. For example:

*Data cannot be shared publicly because of [XXX]. Data are available from the XXX Institutional Data Access / Ethics Committee (contact via XXX) for researchers who meet the criteria for access to confidential data.*

*The data underlying the results presented in the study are available from (include the name of the third party*

The data underlying the results presented in the study are available from <https://www.genescloud.cn/analysis/diversityAnalysis>



|                                                                                                                                                                                                                                         |                                                                                                                                     |
|-----------------------------------------------------------------------------------------------------------------------------------------------------------------------------------------------------------------------------------------|-------------------------------------------------------------------------------------------------------------------------------------|
| <p><i>and contact information or URL).</i></p> <ul style="list-style-type: none"><li>• This text is appropriate if the data are owned by a third party and authors do not have permission to share the data.</li></ul> <p>* typeset</p> |                                                                                                                                     |
| Additional data availability information:                                                                                                                                                                                               | Tick here if your circumstances are not covered by the questions above and you need the journal's help to make your data available. |

## Water extract of ginseng alleviates parkinsonism in MPTP–induced Parkinson's disease mice

Ning Xu<sup>1a</sup>, Shuyang Xing<sup>1a</sup>, Jie Li<sup>a</sup>, Bo Pang<sup>b</sup>, Meichen Liu<sup>a</sup>, Meiling Fan<sup>c\*</sup>, Yu Zhao<sup>a\*</sup>

<sup>a</sup> Jilin Ginseng Academy, Changchun University of Chinese Medicine, Changchun 130117, PR China

<sup>b</sup> College of Pharmacy, Jining Medical University, Rizhao 276826, PR China

<sup>c</sup> The Affiliated Hospital of Changchun University of Chinese Medicine, Changchun 130021, PR China

### Abstract

In this study, we investigated the neuroprotective effect of a water extract of ginseng (WEG) obtained via low–temperature extraction of the brain of mice with Parkinson's disease (PD) and the ameliorative effect on the damaged intestinal system for the treatment of dyskinesia in PD mice. MPTP (1–methyl–4–phenyl–1,2,3,6–tetrahydropyridine) was injected intraperitoneally into male C57BL/6 mice to establish a PD model, and WEG was given via gavage. The results indicated that WEG could protect the damaged neuronal cells of the mice brain, inhibit the aggregation of  $\alpha$ -synuclein ( $\alpha$ -Syn) in the brain, and increase the positive expression rate of tyrosine hydroxylase (TH). WEG significantly improved intestinal damage and regulated intestinal disorders. WEG intervention increased the levels of beneficial bacteria, such as *Lactobacillus*, and normalized the abundance and diversity of colonies in the intestine of mice. Our results suggested that WEG protected neurons in the brain of PD mice via inhibiting the aggregation of  $\alpha$ -Syn in the brain and increasing the positive expression level of TH in the brain. WEG regulated the gut microbiota of mice, improved the behavioral disorders of PD mice, and offered some therapeutic effects on PD mice.

Keywords: Parkinson's disease, water extract of ginseng, neuroprotection, low–temperature extraction, gut microbiota

### Introduction

Parkinson's disease (PD) is a frequent chronic neurodegenerative disease of the elderly, manifested via movement disorders such as tremors, tightening of muscles, and bradykinesia [1]. The pathological features are mainly the accumulation of  $\alpha$ -synuclein ( $\alpha$ -Syn) in the patient's brain, the loss of dopaminergic neurons in the substantia nigra region of the brain, the reduction of tyrosine hydroxylase (TH) forcing the production of Lewy bodies, and the disturbance of the gut microbiota [2–9]. The latest research has found that PD may originate in the intestines. Since abnormal  $\alpha$ -Syn first appears in intestinal neurons before the onset of PD, intestinal dysbacteriosis is most likely related to the onset of PD disease [10]. Intestinal microorganisms act on the central nervous system through metabolites, neurotransmitters and cytokines secreted by immune cells, regulating brain-gut axis interactions [11], and the imbalance of the gut microbiota of Parkinson's patients may lead to  $\alpha$ -Syn misfolding, from the intestinal nerves to the brain and brainstem, which in turn leads to brain dopaminergic neuronal damage. [12]. Treatment for PD is often based on dopamine replacement therapy, which can only improve clinical motor symptoms but cannot cure the disease completely. Levodopa, for example, is converted to dopamine in the presence of Aromatic amino–acid decarboxylase [13]. As the disease progresses, however, the duration of levodopa's effectiveness is reduced and can

\* Corresponding author at: Jilin Ginseng Academy, Changchun University of Chinese Medicine, No. 1035 Boshuo Road, Changchun, Jilin Province 130117, PR China.  
E-mail address: zhaoyu@ccucm.edu.cn (Y. Zhao).

<sup>1</sup> These authors contributed equally to this work.

also cause movement disorders. Data have suggested that some herbal extracts protect dopaminergic neurons and promote functional recovery from brain injury. Thus, herbs acting on multiple targets may have a potential role to play in the treatment of neurodegenerative diseases [14–15].

*Panax ginseng*, a traditional herbal medicine, has been used as a traditional medicine in Asia for more than 2000 years. It is famous for its healthcare and therapeutic effects. Phytochemical studies have found that the main components of ginseng contain many active ingredients, such as polysaccharides, ginsenosides, and proteins. [16]. Clinical studies have shown that ginseng has sedative, anti-aging, and neuroregulatory effects, as well as therapeutic benefits for neurodegenerative diseases. [17–18]. Modern research suggests that compounds in ginseng may be good drugs for treating neurodegenerative diseases, such as PD [19–21]. Jiang et al. studied the neuroprotective effect of boiling-water extract of ginseng on corticosterone-induced apoptosis in PC12 cells [22]. Van et al. found that alcoholic extracts of ginseng, such as G115, significantly reduced dopaminergic cell loss, microglia division, and the accumulation of  $\alpha$ -synuclein aggregates when administered orally [23]. Scholars have found that different ginseng chemical components have similar neuroprotective effects. Wang et al. conducted behavioral tests on mice and demonstrated that ginseng polysaccharides had antidepressant effects [24]. Ginseng polysaccharides also has been demonstrated to have antidepressant effects and may be closely related to neurotransmitters [25–26]. Ginseng polysaccharides improved motor impairment in PD mice, as well as improved oxidative stress levels in mice, reduced the expression of apoptotic proteins in brain tissue of PD mice, and reduced parkinsonian symptoms [27]. Different types of ginsenosides exhibited neuroprotective effects in both in vivo and in vitro tests [28–29]. Chen et al. found that ginsenoside Rb<sub>1</sub> restored neural loss by reducing oxidative stress and neuroinflammation, restoring cholinergic neuronal function, and rescuing cisplatin-induced memory impairment, suggesting that ginsenoside Rb<sub>1</sub> exerts neuroprotective effects [30]. At the same time, ginsenosides also have a potential therapeutic effect on intestinal microbiota dysbiosis. Ginsenoside Rb<sub>1</sub> significantly changed the composition of gut microbiota in hyperglycemic mice and increased the abundance of mucin-degrading bacteria *Akkermansia spp.* [31]. Ginsenoside Rk<sub>3</sub> intake caused significant changes in the intestinal flora of mice, enriching *Bacteroides*, *Alloprevotella* and *Blautia*, significantly reducing the *Firmicutes/Bacteroidetes* ratio, effectively improving intestinal dysbacteriosis and reducing the inflammatory response of mice. [32] Ginseng protein exerted neuroprotective effects on D-galactose/AlCl<sub>3</sub>-induced hippocampus in rats [33]. Liu et al. demonstrated that ginseng protein prevented mitochondrial dysfunction and neurodegeneration in PD by ginseng protein giving *Drosophila melanogaster* PINK1 model of PD [34]. Numerous experiments have been conducted to demonstrate the neuroprotective effects of the three components—that is, ginseng polysaccharides, ginsenosides, and proteins. Whether the synergistic administration of these three components still had a neuroprotective effect and whether the WEG had an improvement on PD in vivo, however, have not been reported.

We know that ginseng extracts obtained using traditional extraction methods under high-temperature environments or with organic solvents. During high-temperature extraction or in organic solvents, proteins in ginseng are decomposed and ginsenosides are partially converted under high-temperature conditions [35–36]. In this study, we investigated the improvement of parkinsonism in mice using WEG obtained using low-temperature extraction. We used a 1–

methyl-4-phenyl-1,2,3,6-tetrahydropyridine (MPTP) induced PD mice model to evaluate the therapeutic effect of WEG on PD mice according to behavioral indicators. For statistical analysis of MPTP-induced changes in  $\alpha$ -Syn and TH in mice brain, we observed the improvement of parkinsonism in mice brain by oral administration of WEG. By analyzing the sequence of gut microbiota of mice fecal samples, we addressed the changes in the gut microbiota in mice with PD. To evaluate the use of ginseng to treat PD, we studied the effect of WEG on the composition and diversity of microbial gut flora in PD mice.

## **Materials and Methods**

### **Animals and feeding**

We used specific pathogen-free (SPF) male C57BL/6 mice (lot number) weighing  $21\pm 1$  g in this study. The animals were raised separately in a clean and dry laboratory with the following environmental conditions: temperature  $25\pm 2^\circ\text{C}$ , humidity  $50\%\pm 5\%$ , alternating light and dark for 12 h/12 h, and free diet. All mice were purchased from YiSi Laboratory Animal Technology Co., Ltd. (Jilin Province, China). All of the animal experiments complied with the requirements of international experimental animal ethics, and were approved by the Animal Ethics Committee of Changchun University of Chinese Medicine.

### **Establishing PD mice, grouping, and drug administration**

The procedure to build the chronic PD mice model. was as follows: After 1 week of adaptive feeding, the mice were randomly divided into six groups (eight mice in each group), including control, model, positive control (P.C.), low, middle, and high groups. We injected MPTP intraperitoneally every three days from days 0 to 14 (dose: 0.6 mg/mouse, blank group was injected intraperitoneally with equal volume of normal saline), and intraperitoneally every two days from days 14 to 28. Oral administration was given on days 28 to 56. According to the records in Pharmacopoeia of the People's Republic of China 2020, the daily oral dose of ginseng for human should be 3–9 g, and the corresponding administration groups of mice were categorized into low (0.013g/kg body weight per day), middle (0.026g/kg body weight per day), and high groups (0.039g/kg body weight per day).

### **Preparation of WEG**

The ginseng used in this study was purchased from Wanliang Ginseng Market (Jilin Province, China). Carbidopa and Levodopa Sustained Release Tablets (Carbidopa50 mg and Levodopa 200 mg/tablet) were purchased from MSD (Hangzhou MSD Pharmaceutical Co., LTD., Hangzhou, China). To prepare the WEG, we crushed the ginseng herbs to form a powder, which was sieved and then placed in a conical flask with a stopper. Ginseng was extracted with neutral aqueous solution ( $\text{pH } 7.0\pm 0.1$ ; ratio of ginseng powder to solvent 1:10) for three times for 12 h at  $4^\circ\text{C}$ . Using centrifugal supernatant fluid filtration, we obtained the samples after vacuum freeze drying. To maximize the retention of active components, such as protein and amino acid in ginseng, the temperature of the whole extraction process was kept below  $30^\circ\text{C}$  (the calculated extraction rate was  $30\%\pm 3\%$ ).

### **Identification of main components in WEG**

We determined the three main chemical components of the WEG. The total protein content of the samples was determined using a Bradford Protein Concentration Kit (Solarbio Science & Technology Co Ltd., Beijing, China), and the result was expressed as a percentage of total protein in the ginseng powder. The total polysaccharide content was determined using the phenol-sulfuric acid solution method, and the result was expressed as the percentage of total

polysaccharide in ginseng powder. The ginsenoside content in the samples was determined using high-performance liquid chromatography (HPLC).

### **HPLC analysis conditions**

HPLC analysis was performed using Agilent LC-1220 HPLC (Agilent Technologies Co Ltd., Santa Clara, CA, USA), equipped with a binary solvent delivery pump, an automatic sampler, and an ultraviolet (UV) detector (Agilent Technologies Co Ltd.). The separation was performed on an Agilent SB-AQ C18 column (250 mm×4.6 mm, 5 μm). The flow rate was 1.0 mL/min. The detection wavelength was set to 203 nm. The column temperature was set at 35°C, and the injection volume was 10 μL. The mobile phase consisted of acetonitrile (A) and 0.1% phosphoric acid aqueous solution (B). The gradient program was as follows: 0–40 min, 19% A. 40–42 min, 19–22% A. 42–46 min, 26–32% A. 46–71 min, 32–38% A. 71–78 min, 38–49% A. 78–83 min, 49–51% A. All solutions were filtered using a 0.22-μm membrane filter before being added to the machine.

### **Behavioral tests**

#### **Pole test**

The pole climbing test is a classical method used to evaluate the motor coordination ability of mice. The climbing rod is an antiskid rod with a length of 50 cm and a diameter of 1 cm that is erected on a plane. The mice climbed from the top to the bottom of the rod, and the time spent climbing was recorded to compare their motor ability.

#### **Rotor test**

A rotor test was used to investigate the reaction and motor ability of mice. A rotating shaft was rotated at 8 g and mice were placed on the opposite side of the rotating rod and moved upward. Mice who stayed on the rotating rod, maintained their balance, and did not fall to the ground, maintained limb muscle coordination. Mice with motor problems or poor coordination fell more quickly. We recorded the amount of time the mice lasted on the rotating rod.

#### **Traction test**

A traction test is a method used to evaluate the motor ability of the mice. We took an 80 cm length of string with a diameter of 0.5 cm and fixed the ends of the string at the same height. The mice were placed upside down on the rope, and we recorded the hanging time.

#### **Morris water maze test**

The water maze test is a sensitive test used to evaluate the learning and memory ability of experimental animals to sense their position in space. The Morris water maze test used in this study was conducted in a circular pool (120 cm in diameter, 50 cm high wall). The pool was filled with water and the temperature was maintained at 24±1°C. We divided the pool equally into four areas. A circular fixed platform (10 cm in diameter) was submerged 1 cm below the surface of the water. On days 1 to 4 of training, the platform was moved to the same position (15 cm from the pool wall) and the mice were gently lowered from the edge of the pool wall at the four area edges (facing the pool wall). The starting position was in the water in the area opposite the platform. The experiment was automatically terminated when the mice climbed onto the platform for the first time and stood still for more than 3 s. If the mouse did not reach the platform within 120 s, the mouse was gently guided to the platform position. The fixed-position search test was conducted on day 5. We added titanium dioxide to the pool to make the water appear white and opaque. We placed the platform in a fixed position 15 cm from the edge of the pool (submerged 1 cm below the surface of the water so that the mice could not see the

platform due to the opacity of the water). We recorded the time when the mice found the platform and the actual swimming distance, as well as the swimming time of the mice in the inner and outer circles. The cruise experiment was conducted on day 6. We recorded the swimming time, stationary time, and swimming distance of the mice in 120 s. All data were obtained using a video tracking system (Taimeng Technology Co Ltd., Chengdu, China).

### **Tissue collection**

After completing the behavior test, the mice were euthanized after being anesthetized with carbon dioxide. The head and body were separated, and the rectum with fecal contents was immediately dissected and taken from all mice and placed in cryopreservation tubes. The samples were quickly placed in liquid nitrogen and stored at ultralow temperatures for the detection of gut microbiota. The mouse brain was quickly removed on a cold wooden board and immediately immobilized in 4% paraformaldehyde for 48 h for immunohistochemistry (IHC) and hematoxylin and eosin (H&E). Small intestine was taken from mice at the same location and immediately fixed in 4% paraformaldehyde for 48 h for H&E.

### **Western blot analysis**

The mice brains were lysed using RIPA lysis buffer (Solarbio Science & Technology Co. Ltd., Beijing, China) and the supernatant was collected using  $10^4g$  centrifugation at  $4^{\circ}C$  for 10 min. We determined protein concentration using the Bradford Protein Concentration Kit by adding the appropriate amount of loading buffer and then boiling the sample to denature it. Protein samples (30  $\mu g$  per lane) were separated using gel electrophoresis and transferred to polyvinylidene fluoride (PVDF) films (Millipore, Bedford, MA, USA). After the transfer, the transferred PVDF films were placed in an antibody incubation kit and closed at  $25^{\circ}C$  for 2 h on a shaker with an appropriate amount of 5% skimmed milk powder, after closure the films were washed three times with Tris-buffered saline with polysorbate 20 (TBST) for 5 min each. PBST was discarded and the films were incubated overnight on a shaker at  $4^{\circ}C$  with primary antibodies against  $\alpha$ -Syn (1:1000), TH (1:6000), glyceraldehyde 3-phosphate dehydrogenase (GAPDH) (1:1000), and  $\beta$ -tubulin (1:2000) (all antibodies were purchased from Abcam Biotechnology Co Ltd., Cambridge, UK). This process was followed by incubation with horseradish peroxidase-conjugated antibody for 1 h. We used  $\beta$ -tubulin and GAPDH as a loading control.

### **Intestinal microbiome analysis**

We conducted gut microbe 16S rRNA sequencing and data analysis. According to the manufacturer's protocol, the total DNA used was fecal DNA Isolation Kit (MP Biomedicals, Santa Ana, CA, USA). The amplified polymerase chain reaction (PCR) products were sequenced on Illumina MiSeq, and the high-quality sequences with 97% homology similarity were classified by operational taxon (OTU). The sequencing primer was F:ACTCCTACGGGAGGCAGCA R:GGACTACHVGGGTWTCTAAT and the sequencing region was 16S-V3V4. We used QIIME2 (Quantitative Insights Into Microbial Ecology, V2.0, <https://docs.QIIME2.org/>) and R package 3.5.1 (<https://www.r-project.org/>) for the 16S rRNA gene sequencing analysis. We analyzed alpha diversity by Chao1 and Shannon indices. Beta diversity was studied using principal coordinate analysis (PCoA) and a weighted UniFrac phylogenetic distance matrix. We determined bacterial community structure using relative abundance at the phylum level and compared the differences between groups at the genus level using the heat map method.

## Statistical analysis

We plotted all data by GraphPad Prism7.0 software and analyzed the data using SPSS22.0 statistical software. Data were expressed as mean±SD. We used one-way analysis of variance (ANOVA) to compare the mean across multiple groups, and Tukey's test for the postcomparison of multiple groups.  $P < 0.05$  was regarded as the threshold of significance.

## Results

### Main compound mass in WEG

The calculated extraction rate of WEG was  $34.23 \pm 3.50\%$ . The protein content of WEG was 21.51%, accounting for 7.36% of ginseng:

$$Y = 0.6136X + 0.5851, \quad (1)$$

where range =  $0-1.5 \text{ mg} \cdot \text{mL}^{-1}$ , and  $R = 0.9967$ .

Ginseng polysaccharides in WEG was 68.40%, accounting for 23.41% of ginseng:

$$Y = 0.6327X + 0.1083, \quad (2)$$

where range =  $0-0.6 \text{ mg} \cdot \text{mL}^{-1}$ , and  $R = 0.9998$ .

WEG was quantified for the analysis of ginsenosides by HPLC. HPLC profiles are shown in Fig. 1. Each ginsenoside contained the following: Ro 0.13%, Rg<sub>1</sub> 0.66%, Re 2.39%, Rf 0.27%, Rg<sub>2</sub> 0.09%, Rh<sub>1</sub> 0.03%, Rb<sub>1</sub> 4.93%, Rc 1.05%, Rb<sub>2</sub> 0.21%, Rb<sub>3</sub> 0.25%, Rd 1.15%, and Rg<sub>3</sub> 0.11%. With a total content of 11.27% for all ginsenosides, accounting for 3.86% of the ginseng. All standard substances were purchased from Yuanye Bio-Technology for (Yuanye Bio-Technology Co Ltd., Shanghai, China).

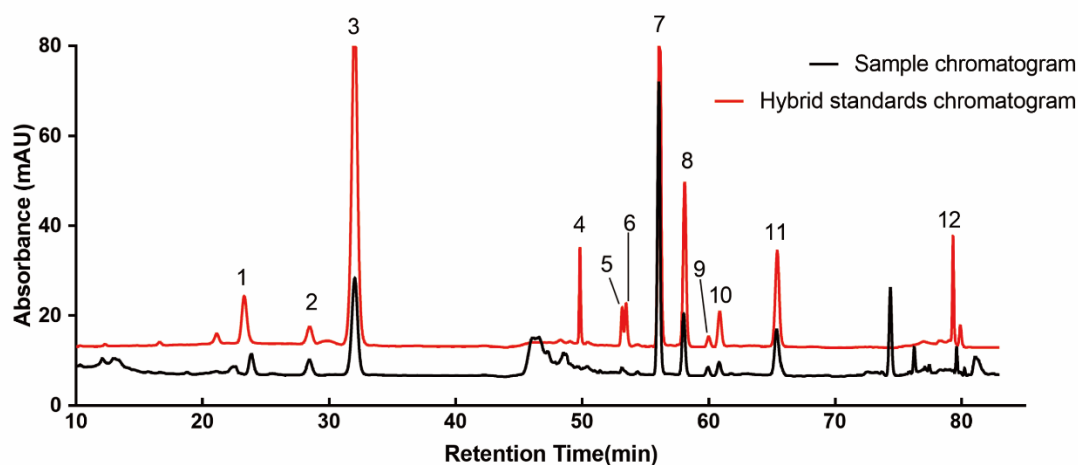

**Fig. 1.** HPLC chromatogram of ginsenosides (1: Ro. 2: Rg<sub>1</sub>. 3: Re. 4: Rf. 5: Rg<sub>2</sub>. 6: Rh<sub>1</sub>. 7: Rb<sub>1</sub>. 8: Rc. 9: Rb<sub>2</sub>. 10: Rb<sub>3</sub>. 11: Rd. 12: Rg<sub>3</sub>)

#### 3.1.1. Validation of analytical methods

We evaluated the proposed method according to the working curves and analytical performance, including linearity, precision, accuracy, and stability:

- Linearity: The working curves were plotted from the peak area values against the concentrations of the 12 ginsenosides in the spiked samples (Table 1).

#### Table 1

Regression equation for 12 compounds.

| Anlytes         | Regression Equation | Correlation Coefficient(R) | Range( $\mu$ g) |
|-----------------|---------------------|----------------------------|-----------------|
| Ro              | Y=593434X-3.6976    | 0.9995                     | 0.16-0.97       |
| Rg <sub>1</sub> | Y=133991X+21.999    | 0.9989                     | 0.23-1.35       |
| Re              | Y=235757X+162.72    | 0.9988                     | 3.33-19.98      |
| Rf              | Y=339669X-48.157    | 0.9975                     | 0.25-1.52       |
| Rg <sub>2</sub> | Y=377672X-2.3765    | 0.9997                     | 0.09-0.52       |
| Rh <sub>1</sub> | Y=521556X-2.3441    | 0.9994                     | 0.08-0.47       |
| Rb <sub>1</sub> | Y=194604X+28.418    | 0.9999                     | 1.98-11.88      |
| Rc              | Y=219980X+5.8826    | 0.9997                     | 0.86-5.13       |
| Rb <sub>2</sub> | Y=171807X-0.375     | 0.9999                     | 0.07-0.44       |
| Rb <sub>3</sub> | Y=214806X+6.6436    | 0.9998                     | 0.21-1.28       |
| Rd              | Y=249009X-7.1487    | 0.9998                     | 0.60-3.60       |
| Rg <sub>3</sub> | Y=529942X-7.9875    | 1.0000                     | 0.16-0.96       |

- Precision: The RSDs of the peak areas of the 12 analytes showed that Ro 0.62%, Rg<sub>1</sub> 0.94%, Re 0.21%, Rf 0.89%, Rg<sub>2</sub> 1.28%, Rh<sub>1</sub> 1.54%, Rb<sub>1</sub> 0.78%, Rc 2.33%, Rb<sub>2</sub> 1.05%, Rb<sub>3</sub> 0.60%, Rd 1.33%, and Rg<sub>3</sub> 1.38% were all less than 3%.

- Accuracy: The RSDs of the peak areas of the 12 analytes showed that Ro 0.91%, Rg<sub>1</sub> 0.68%, Re 1.21%, Rf 0.47%, Rg<sub>2</sub> 1.36%, Rh<sub>1</sub> 1.76%, Rb<sub>1</sub> 1.73%, Rc 2.06%, Rb<sub>2</sub> 1.64%, Rb<sub>3</sub> 1.38%, Rd 2.13%, and Rg<sub>3</sub> 1.56% were all less than 3%.

- Stability (12 h): The RSDs of the peak areas of the 12 analytes showed that Ro 1.47%, Rg<sub>1</sub> 1.37%, Re 1.74%, Rf 2.64%, Rg<sub>2</sub> 2.33%, Rh<sub>1</sub> 1.84%, Rb<sub>1</sub> 0.67%, Rc 1.74%, Rb<sub>2</sub> 1.83%, Rb<sub>3</sub> 1.76%, Rd 1.50%, and Rg<sub>3</sub> 2.23% were all less than 3%.

### **WEG improved motor behavior in PD model mice**

The mice behavioral experiments were conducted in two parts, in which the pole test, the traction test, and the rotary test were judgments of the strength of the mice's limbs and were used as the basis for whether the mice had motor impairment. For the Morris water maze test, mice were examined for their spatial learning and memory abilities. We determined whether there was an improvement in Parkinson's behavior based on spatial memory ability.

### **Comparison of action-behavioral disorders of the limbs in mice**

The pole test can be used to evaluate the muscular endurance of mice. The climbing time reflected the fatigue level of mice. A short climbing time decreased the muscular endurance (Fig. 2A). The model group showed a reduced pole climbing time compared with the blank group ( $P < 0.01$ ). The behavioral performance of mice treated with Carbidopa and Levodopa CR Tablets (CLCRT) or WEG was attenuated compared with mice in the modeling group. The P.C. group had a longer pole climbing time compared with the model group ( $P < 0.05$ ). The low group ( $P < 0.0001$ ), which was the group treated with WEG administration, had the longest pole climbing time. The middle group ( $P < 0.05$ ) and the high group ( $P < 0.01$ ) had prolonged



time spent compared with the model group. The PD model mice showed significant dysfunction in limb movement coordination, whereas WEG significantly improved their limb coordination motor dysfunction.

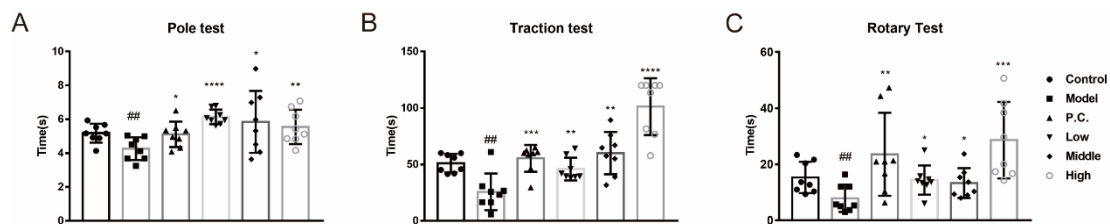

**Fig. 2.** WEG improves body-coordinated motor dysfunction in PD mice. (A) Pole test results. (B) Traction test results. (C) Rotary test results. Statistical analyses were performed using one-way ANOVA: \* $P < 0.05$ , \*\* $P < 0.01$ , \*\*\* $P < 0.001$ , \*\*\*\* $P < 0.0001$  vs. model group. # $P < 0.05$ , ## $P < 0.01$  vs. normal group; mean  $\pm$  SD.

In the traction test (Fig. 2B), grasp time was reduced in the model group ( $P < 0.01$ ) compared with the control group. Grasp time was significantly higher in mice in the high group treated with WEG compared with the model group ( $P < 0.0001$ ). The P.C. group ( $P < 0.001$ ), the low group ( $P < 0.01$ ), and the middle group ( $P < 0.01$ ) had significantly higher grip times.

Experimental results from the rotary test showed (Fig. 2C) that the dwell time was shorter in the model group compared with the control group ( $P < 0.01$ ). When compared with the model group, the residence time on the rotating bar was significantly higher in the high group treated with WEG ( $P < 0.001$ ). Group WEG had improved dwell time compared with P.C. group ( $P < 0.01$ ), the low group ( $P < 0.05$ ), and the middle group ( $P < 0.05$ ). This result suggested that WEG had the ability to improve the equilibrium disorder in MPTP-induced mice.

Predictors of WEG's ability to improve balance disorders in MPTP-induced mice were indicated by the results of the pole test, rotary test, and traction test.

### Spatial learning and memory skills compared

We used the Morris water maze test to assess the spatial learning and memory abilities of mice. For the positioning test (Fig. 3), the time ratios (TR,  $O/(I+M)$ ) of the sum of swimming time in the outer ring to swimming time in the center and swimming time in the inner ring. In the positioning test, the time to find a platform, the distance swum, TR, and the locomotor thermogram were used to provide feedback on the behavioral ability of the mice. Model mice had significantly higher time to find a plateau ( $P = 0.0002$ ), distance ( $P = 0.0005$ ), and TR ( $P = 0.0075$ ) than the control group. Compared with the model group, treatment with CLCRT and WEG significantly reduced swimming time ( $P = 0.0003$  for P.C. group,  $P = 0.0004$  for the low group,  $P = 0.0005$  for the middle group, and  $P = 0.0006$  for the high group), reduced distance ( $P = 0.0029$  for P.C. group,  $P = 0.0016$  for the low group,  $P = 0.0001$  for the middle group, and  $P = 0.0001$  for the high group), and decreased TR values ( $P = 0.0206$  for P.C. group,  $P = 0.2738$  for the low group,  $P = 0.0111$  for the middle group, and  $P = 0.0223$  for the high group).

According to the results of the experiment, the number of passes in the model group ( $P = 0.0083$ ) was significantly less than that of the blank group. Treatment with CLCRT and WEG significantly improved the learning memory ability of the mice. Swimming distance was shorter in the model group compared with the blank group ( $P = 0.00002$ ). TR was greater in the model group ( $P = 0.0014$ ) than in the blank group. There was a greater number of passes over the platform compared with the model group ( $P = 0.0486$  for P.C. group,  $P = 0.0022$  for the low

group,  $P = 0.0017$  for the middle group, and  $P = 0.0006$  for the high group). Swimming time was longer compared with the model group ( $P = 0.0047$  for P.C. group,  $P = 0.0114$  for the low group,  $P = 0.0003$  for the middle group, and  $P = 0.0007$  for High). Resting time was shorter compared with the model group ( $P = 0.0047$  for P.C. group,  $P = 0.0114$  for the low group,  $P = 0.0003$  for the middle group, and  $P = 0.0007$  for the high group). Compared with the model group, swimming distance increased ( $P = 0.0006$  for P.C. group,  $P = 0.0119$  for the low group,  $P = 0.0007$  for the middle group, and  $P = 0.0002$  for High). TR values for all groups ( $P = 0.0508$  for P.C. group,  $P = 0.0332$  the low group,  $P = 0.0016$  for the middle group, and  $P = 0.0025$  for the high group) were smaller than the model group. The facts showed that the shortest distance a mouse has to travel to find a platform was across the central two quadrants. From this, we know that the longer the time spent searching for a platform in the outer quadrant among the learning memory of PD mice, the relatively longer the distance a mouse has to travel to find the platform. Thus, the greater the ratio of the time the mice spent swimming in the outer quadrant compared with the time the mice spent swimming in the inner quadrant, the worse the PD mice were at finding platforms and the worse the spatial memory ability of the mice. Spatial memory ability is an examination of the strength of the mice's brain's ability to learn to remember.

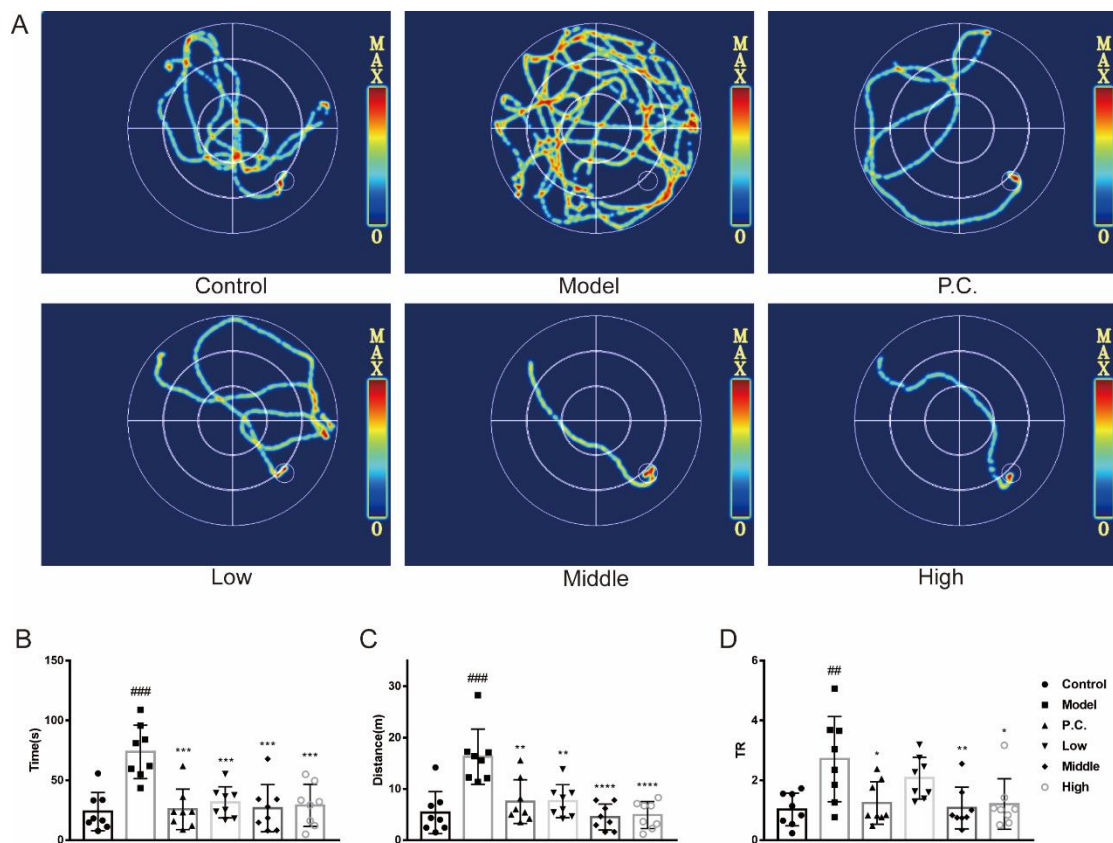

**Fig. 3.** Effect of WEG on the ability of mice to find platforms in the Morris water maze test. (A) Trajectory diagram of platform-seeking ability in mice. (B) Time to find the platform (in seconds). (C) Distance of swimming when finding the platform (meters). (D) Ratio of outer circle swimming time to the sum of central and inner circle swimming time TR. Statistical analyses were performed using one-way ANOVA: \* $P < 0.05$ , \*\* $P < 0.01$ , \*\*\* $P < 0.001$ , \*\*\*\* $P < 0.0001$  vs. model group. # $P < 0.05$ , ## $P < 0.01$ , ### $P < 0.001$  vs. normal group; mean  $\pm$  SD.

WEG was not concentration-dependent in terms of behavioral improvement in PD mice. Compared with CLCRT, the WEG regimen was more effective in reversing behavioral deficits in PD mice.

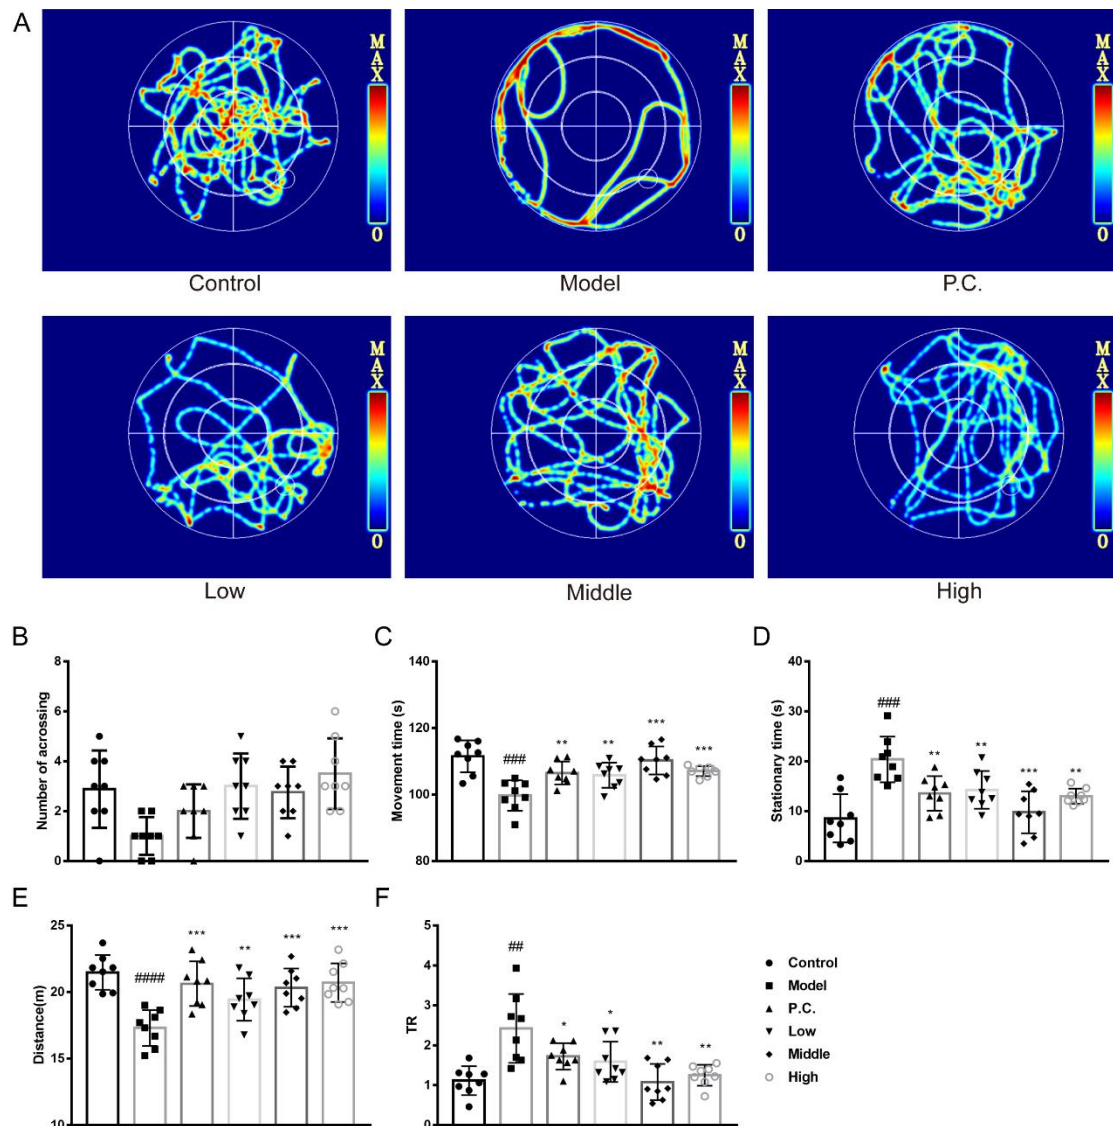

**Fig. 4.** WEG effects on the probing ability of the Morris water maze test in mice. (A) Trajectory diagram of mice swimming. (B) Number of times mice passed the platform position. (C) Time spent swimming. (D) Time spent at rest. (E) Distance swimming by mice. (F) TR. Statistical analyses were performed using one-way ANOVA: \* $P < 0.05$ , \*\* $P < 0.01$ , \*\*\* $P < 0.001$ , \*\*\*\* $P < 0.0001$  vs. model group. # $P < 0.05$ , ## $P < 0.01$ , ### $P < 0.001$  vs. normal group; mean  $\pm$  SD.

### WEG improves brain pathological changes in mice

We stained sections of the hippocampal CA1 area in mice with H&E (Fig. 5), and the area ratio of neuronal cells in the CA1 area of the hippocampus and the area ratio of neuronal cells in the striatum were calculated using ImageJ software. The cells in the CA1 area of the hippocampus of the control group were regular in morphology, with plump cell bodies, neat and orderly arrangement, clear nuclei, and intact neuronal morphology (Fig. 5A). In the model group, the CA1 area was damaged to some extent, and the nuclei were blurred, as shown by partial loss of neurons, empty stained cytosol, disordered cell arrangement, significantly

reduced number of neurons, and incomplete morphology. The improvement in the P.C. group was not significant (Fig. 5C). Nerve cells in the striatum of mice in the control group had clear structure and normal morphology with irregular shape (Fig. 5B). In the model group, incomplete cell morphology, scattered neuronal cells, reduced number of neuronal cells, and disorganized arrangement were seen in the striatum. More vacuoles were seen throughout the striatum. Compared with the model group, after treatment with WEG, the neuronal cells in the striatum of mice showed different degrees of restoration of morphological structure, and were more densely and neatly arranged. In addition to an increase in the number of cells (Fig. 5D), their distribution was more uniform, the cell spaces were reduced, and most of the cells returned to normal morphology.

### **Evidence of the effect of WEG on the rate of $\alpha$ -Syn positivity in the substantia nigra (SN) and TH positivity in the striatum of PD mice**

$\alpha$ -Syn is a key pathological product of PD pathogenesis. We performed IHC experiments on the substantia nigra of the mouse brain using the rabbit antibody  $\alpha$ -Syn (Abcam, ab212184). The results of  $\alpha$ -Syn IHC in the SN are shown in Fig. 6A, and positive ratios were calculated using ImageJ software (Fig. 6C).  $\alpha$ -Syn-positive cells were seen less frequently in the substantia nigra of the control mice, mainly in the cytoplasm and cytosol. We found an increase in  $\alpha$ -Syn positive cells in the substantia nigra in the model group compared with the control group ( $P < 0.0000$ ). CLCRT and WEG reduced the rate of  $\alpha$ -Syn positivity in the substantia nigra. WEG improved the aggregation of  $\alpha$ -Syn in the brain of MPTP-induced PD mice. We performed assays for striatal IHC of mice brains using the rabbit antibody TH (Abcam, ab137869), and positive ratios were calculated using ImageJ software (Fig. 6B and 6D). In the striate tissue of the control group, TH-positive cells were more abundant, mainly in the cytoplasm and cytosol, than in the blank group ( $p < 0.0000$ ). Striatal TH positivity was increased in the model group compared with the striatum ( $P < 0.0000$  for all groups).

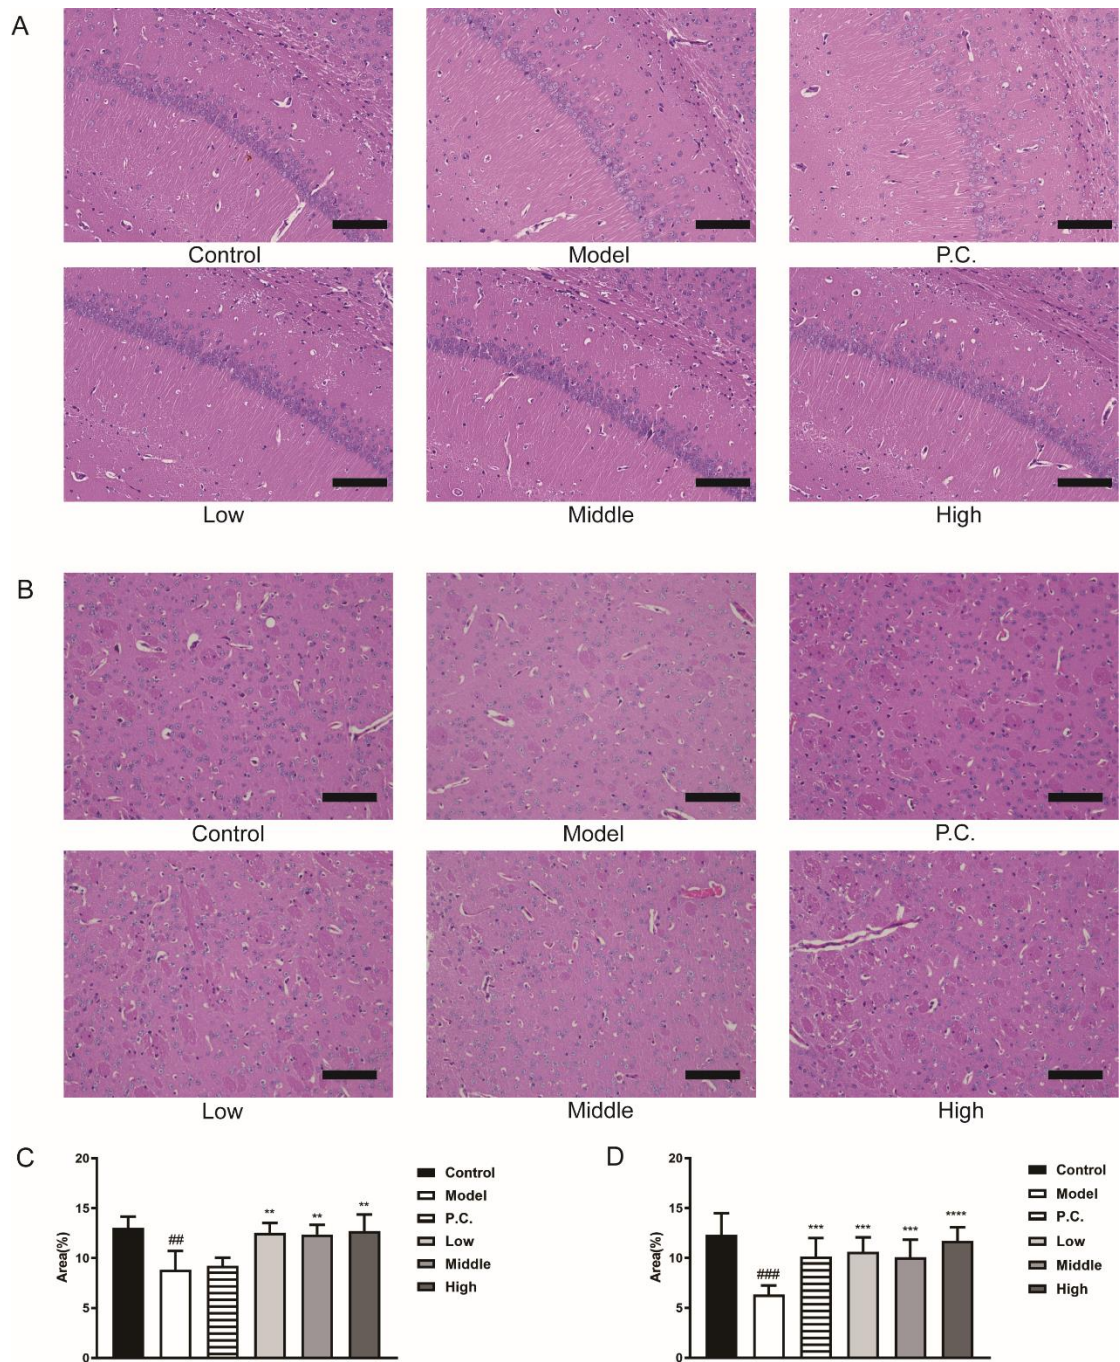

**Fig. 5.** WEG effects on MPTP-induced pathological changes in the hippocampal CA1 region and striatum of mice. (A) H&E staining of the hippocampal CA1 region of mice ( $\times 200$ , 100  $\mu\text{m}$ ). (B) H&E staining of the striatum of mice ( $\times 200$ , 100  $\mu\text{m}$ ). (C) Percentage of neuronal cells in CA1 region of hippocampus (%). (D) Percentage of neuronal cells in the striatum (%). Statistical analyses were performed using one-way ANOVA: \* $P < 0.05$ , \*\* $P < 0.01$ , \*\*\* $P < 0.001$ , \*\*\*\* $P < 0.0001$  vs. model group. # $P < 0.05$ , ## $P < 0.01$  vs. normal group; mean  $\pm$  SD.

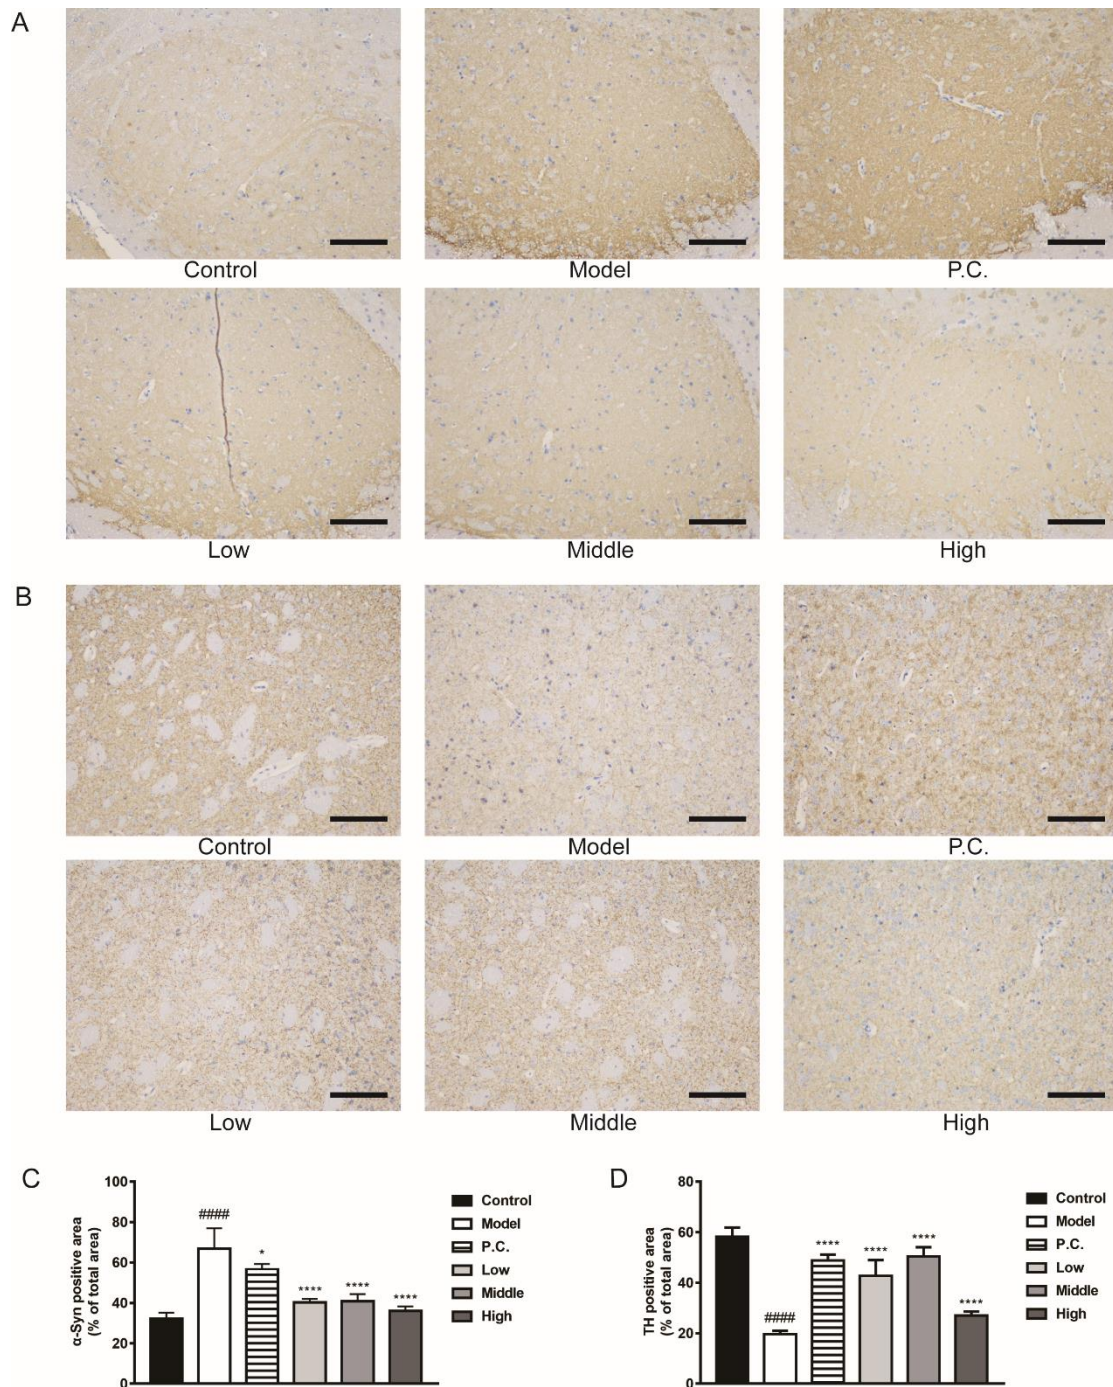

**Fig. 6.** WEG results of IHC experiments in the brain of PD mice. (A) IHC staining of WEG for positive expression of  $\alpha$ -syn in the SN of PD mice ( $\times 200$ ,  $100 \mu\text{m}$ ). (B) IHC staining of WEG for positive expression of TH in the striatum of PD model mice ( $\times 200$ ,  $100 \mu\text{m}$ ) Percentage of area positive for  $\alpha$ -syn in each group (%). (D) Percentage of area positive for TH in each group (%). Statistical analyses were performed using one-way ANOVA: \* $P < 0.05$ , \*\* $P < 0.01$ , \*\*\* $P < 0.001$ , \*\*\*\* $P < 0.0001$  vs. model group. # $P < 0.05$ , ## $P < 0.01$ , ### $P < 0.001$ , #### $P < 0.0001$  vs. normal group; mean  $\pm$  SD.

**Effect of WEG on the expression levels of TH and  $\alpha$ -Syn protein in the brain of PD mice**

With a view of exploring the treatment action of WEG on MPTP-induced PD in mice, we

assessed TH and  $\alpha$ -Syn activation according to western blot (Fig. 7). The MPTP treated mice in the model group showed significantly reduced expression of TH and significantly increased expression of  $\alpha$ -Syn in brain tissue compared with the control group. The expression level of TH protein was up-regulated and that of  $\alpha$ -Syn protein was significantly down-regulated in the brain tissue of mice after WEG intervention. WEG had a neuroprotective effect on MPTP-induced PD mice and improved the expression levels of TH and  $\alpha$ -Syn in the brain.

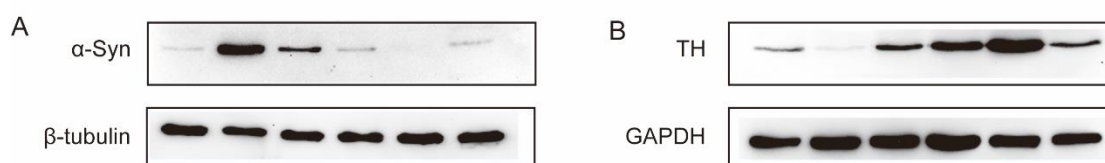

**Fig. 7.** Effect of WEG therapy on expression of (A)  $\alpha$ -Syn and (B) TH. From left to right samples are in order of control, model, P.C., low, middle, and high groups.

### **WEG improves pathological changes in the small intestine**

We performed H&E staining (Fig. 8A) and periodic acid-Schiff (PAS) staining (Fig. 8B) on sections of mouse small intestine, and calculated the length of the small intestinal villus ( $\mu\text{m}$ ) as well as the area ratio of goblet cells (%) using ImageJ software. The intestinal mucosa of the small intestine of the blank group of mice was pink, with intact and regular villus structure and neat margins; the crypt was relatively shallow, the small intestinal glands were intact, and the number of goblet cells was high (PAS treatment showed positive results). Compared with the control group, the model group showed broken or detached small intestinal villus ( $P = 0.0000$ ), a significant decrease in the number of goblet cells ( $P = 0.0000$ ), significant destruction of the villus structure, and more severe damage to the small intestinal glands. WEG had an improvement effect on intestinal tissue in PD model mice. Compared with the model group, the WEG-treated mice showed longer villus length ( $P = 0.0414$  for the low group,  $P = 0.0040$  for the middle group, and  $P = 0.0004$  for the high group) and a higher number of goblet cells ( $P = 0.0017$  for the low group,  $P = 0.0149$  for the middle group, and  $P = 0.0004$  for the high group). ( $P = 0.0149$  for the middle group and  $P = 0.0001$  for the high group.) The reduced depth of the crypt was associated with improved damage to the intestinal mucosa and small intestinal glands and a corresponding increase in the digestion and absorption of nutrients.

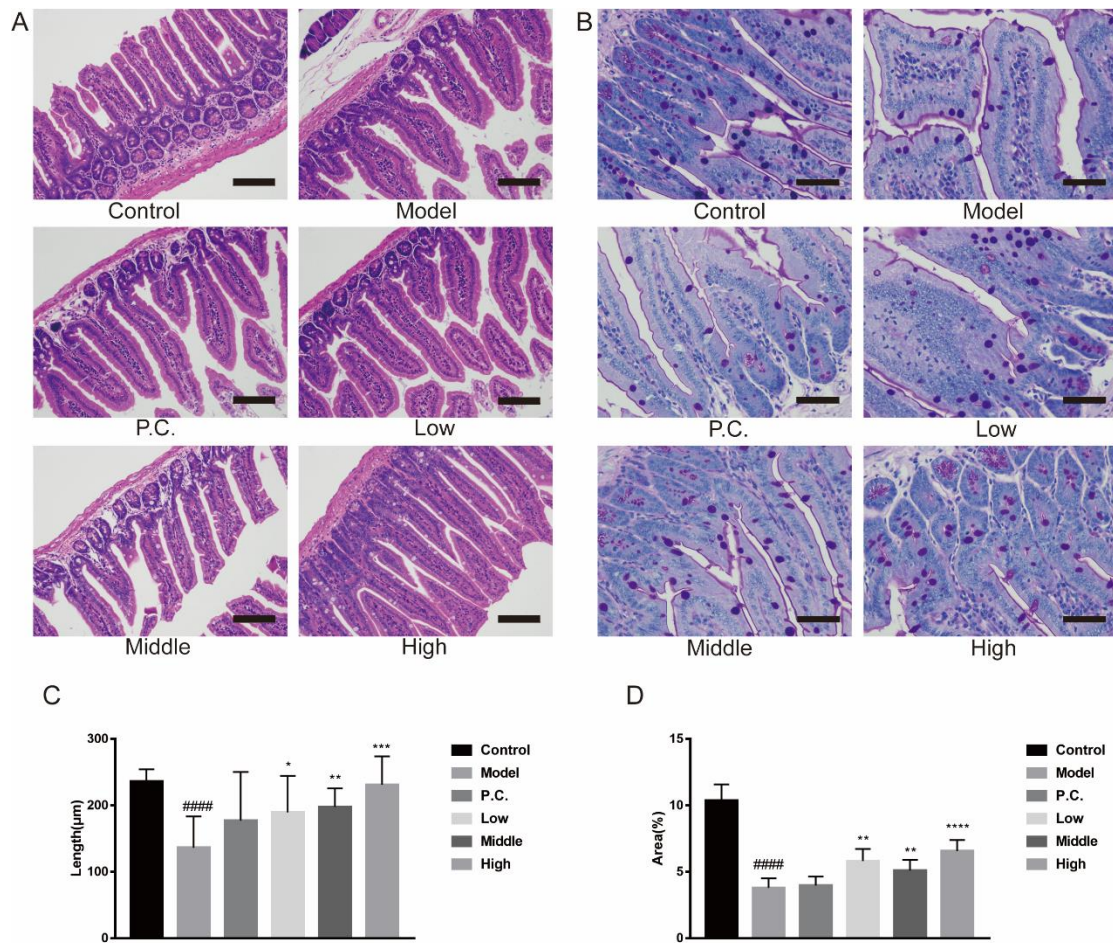

**Fig. 8.** Effect of WEG on MPTP-induced histopathological changes in the small intestine of mice. The small intestine of mice was stained with H&E and PAS to observe the morphological changes in the small intestine. (A) H&E staining of small intestine ( $\times 200$ ). (B) PAS staining of small intestine ( $\times 400$ ). (C) Length of small intestine villi in each group ( $\mu\text{m}$ ). (D) Positive area in each group of sections (%). Statistical analyses were performed using one-way ANOVA: \* $P < 0.05$ , \*\* $P < 0.01$ , \*\*\* $P < 0.001$ , \*\*\*\* $P < 0.0001$  vs. model group. # $P < 0.05$ , ## $P < 0.01$ , ### $P < 0.001$  #### $P < 0.0001$  vs. normal group, mean  $\pm$  SD.

### WEG improves gut microbiota dysbiosis in PD mice

In this study, the effects of different doses of WEG on the gut microbiota of PD mice were observed from different units. According to structural analysis of the microbial colonies at the phylum unit for comparison among groups, the following seven phyla were common to all samples: Firmicutes, Bacteroidetes, Proteobacteria, Saccharibacteria (TM7), Actinobacteria, Deferribacteres, and Tenericutes. Normal mice gut microflora consisted mainly of Firmicutes and Bacteroidetes, with the sum of the two accounting for more than 97% of the total microflora. The relative abundance ratios of Firmicutes and Bacteroidetes were analyzed comparatively. The model group had less Firmicutes ( $P < 0.0000$ ) and more Bacteroidetes ( $P = 0.0001$ ) compared with the control group. Compared with the model group, the WEG resulted in an increased proportion of Firmicutes ( $P = 0.0059$  for the low group,  $P = 0.0365$  for the middle group, and  $P = 0.0124$  for the high group) and a decreased proportion of Bacteroidetes in the mice intestine ( $P = 0.0026$  for the low group,  $P = 0.0347$  for the middle group, and  $P = 0.0090$  for the high group). In addition, CLCRT caused an increase in the proportion of Firmicutes ( $P$



= 0.0001) and a decrease in the proportion of Bacteroidetes ( $P = 0.0002$ ) in the intestine of mice.

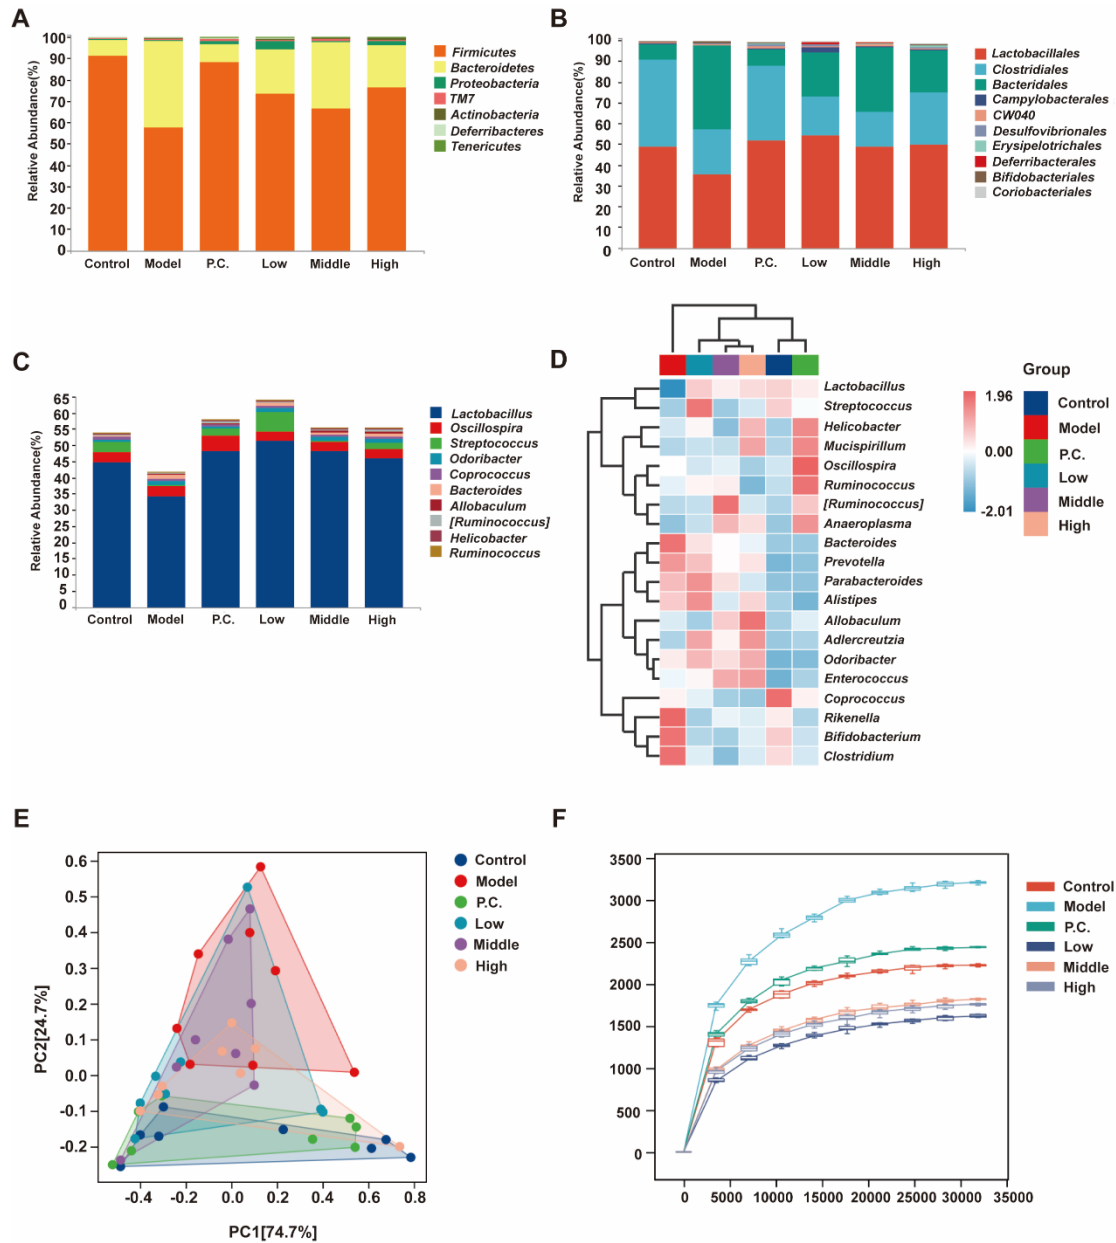

**Fig.9.** Effect of WEG in different basic units on the composition of gut microflora in PD mice. (A) Effect of WEG based on order species unit on gut microflora in PD mice. (B) Effect of WEG based on phylum species unit on gut microflora in PD mice. (C) Effect of WEG based on genus species unit on gut microflora in PD mice. (D) Heat map for genus unit based. (E) Principal component analysis. (F) Rarefaction curves based on Chao1 index.

According to the microbial colony structure analysis at the order level, the normal mice gut microbiota consisted mainly of the orders *Lactobacillales*, *Clostridiales*, and *Bacteroidales*, accounting for more than 97% of the total number of bacteria. *Lactobacillales* were reduced in the model group compared with the control group ( $P = 0.0016$ ). Both CLCRT and WEG increased the amount of *Lactobacillales* in the intestine of mice compared with the model group ( $P = 0.0038$  for the P.C. group,  $P = 0.0001$  for the low group,  $P = 0.0306$  for the middle group, and  $P = 0.0044$  for the high group). *Bacteroidales* were less abundant in the model group compared with the control group ( $P = 0.0055$ ). Both CLCRT and high doses of WEG elevated

the amount of *Clostridiales* in the intestine of mice compared with the model group ( $P = 0.0304$  for the P.C. group and  $P = 0.0509$  for the high group), but the low and middle doses of WEG did not have a significant effect on *Clostridiales* in the intestine of mice. *Bacteroidales* were reduced in the *Modelmodel* group compared with the control group ( $P = 0.0001$ ). Both CLCRT and WEG resulted in increased levels of *Bacteroidales* in the intestine of mice compared with the model group ( $P = 0.0002$  for the P.C. group,  $P = 0.0026$  for the low group,  $P = 0.0347$  for the middle group, and  $P = 0.0071$  for the high group).

According to the genus unit microbial colony structure analysis, the normal mice gut microflora consisted mainly of *Lactobacillus*, *Oscillospira*, and *Streptococcus*, accounting for more than 50% of the total bacterial flora. *Lactobacillus* levels were reduced in the model group compared with the control group ( $P = 0.0052$ ) and *Streptococcus* levels were also reduced in the model group ( $P = 0.0054$ ). Both CLCRT and WEG increased *Streptococcus* levels in the intestine of mice compared with the model group ( $P = 0.0107$  for the P.C. group,  $P = 0.0001$  for the low group, and  $0.0102$  for high group). Ginseng showed significant improvement in gut microbiota disorders in PD mice after a low-dose WEG administration, which most closely resembled the gut flora composition of normal mice. In addition, *Oscillospira* was not significantly different between the groups, although *Oscillospira* accounted for approximately 3% of the gut microbiota of the mice. MPTP-induced PD was not associated with *Oscillospira*, however, and we did not find any significant difference between the groups. The WEG intervention significantly increased the levels of beneficial bacteria, such as *Lactobacillus*. Treatment with WEG restored the abundance of probiotic bacteria and reduced the levels of harmful microflora.

We drew a clustering heat map based on the genus unit, reflecting the trend of species abundance distribution among the groups, with red representing positive correlation and blue representing negative correlation (Fig. 9D). The figure clearly shows that the model group clustered separately, whereas the remaining five treatment groups clustered into one category with the normal group. Among them, WEG not only interfered with the elevation of beneficial genera, such as *Lactobacillus*, but also made the elevation of other beneficial genera related to glycolipid metabolism, such as *Allobaculum* and *Adlercreutzia*, which improved the flora environment in the body.

High doses of WEG did not reduce the level of *Odoribacter* and *Enterococcus* and other genera in the intestine, but rather elevated them. Therefore, although a high dose of WEG could improve PD, it also affected the intestinal bacteria in mice. As shown by the principal component score plot, the WEG and CLCRT treatment groups were relatively concentrated with the blank group in terms of dispersion, and the model group had less overlap with the rest of the groups. Additionally, the first principal component in this principal component analysis accounted for 74.7%, and the second principal component accounted for 24.7%, with a cumulative contribution value of 99.4%, reaching more than 85% of the eigenvalues (Fig. 9E).

We conducted an evaluation of community richness and diversity in the gut of mice using the alpha-diversity index. A rarefaction curve was plotted using the index type Chao1 index (Fig. 9F). When the extraction depth reached above 20,000, the rarefaction curve leveled off, indicating that the amount of sequencing was sufficient to cover all taxa in the sample. For a more comprehensive assessment of the alpha diversity of the microbial community, we used an index such as Chao1 (Fig. 10A). In the alpha-diversity analysis, the indices for each WEG

dosing group were close to the control group with significant differences compared with the model group ( $p < 0.05$  for all group). The results of the alpha analysis indicated that treatment with WEG normalized the diversity and richness of the gut bacterial flora. Beta diversity was analyzed using both principal coordinates analysis (PCoA) and nonmeasured multidimensional scale analysis (NMDS) to describe the variability of the samples (group to group). We evaluated the distance of similarity between samples by NMDS analysis (Fig 10B). The distances between the model group and the other groups were clearly separated, while the WEG treatment group was close to the control group. The results indicated that treatment with WEG led to a convergence of intergroup variability in the gut microbiota of PD mice with the normal group.

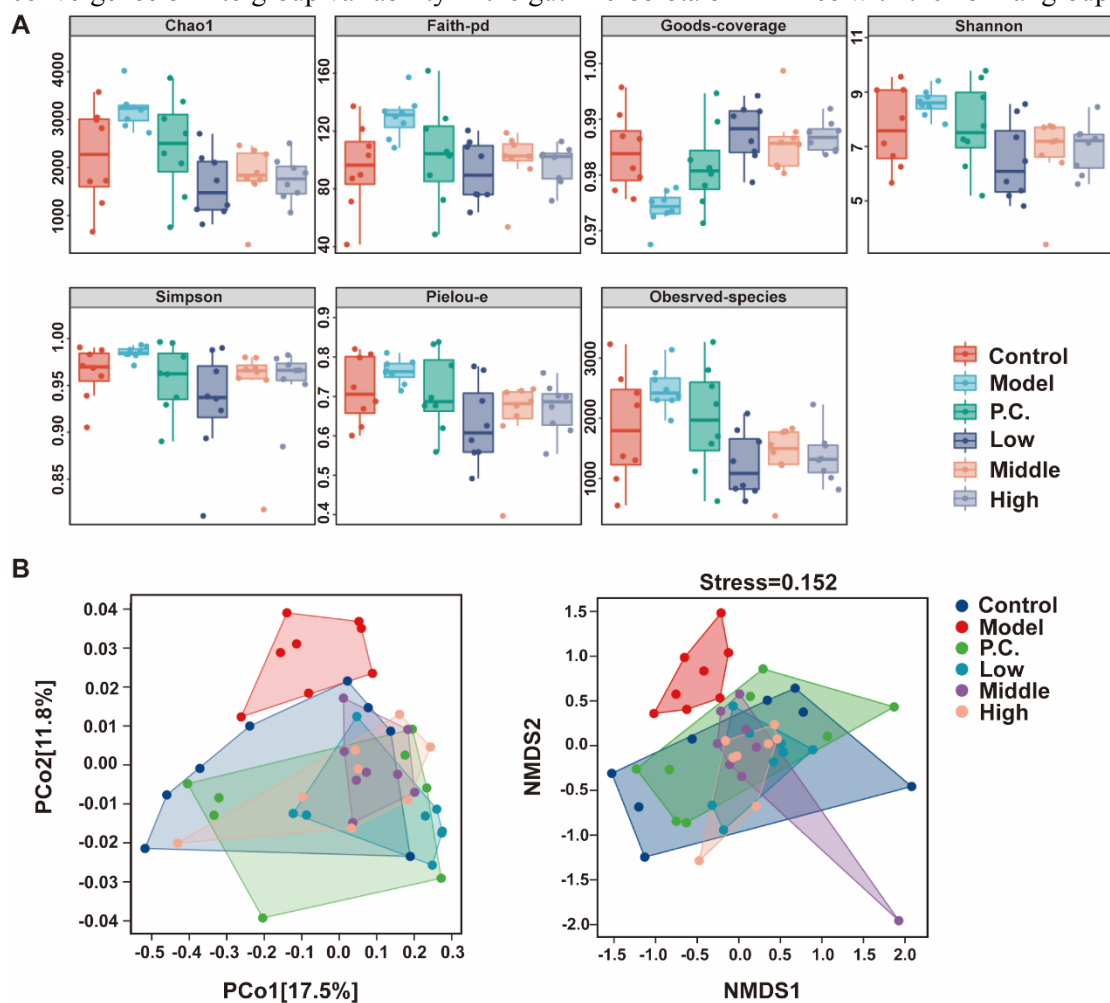

**Fig. 10.** Effect of WEG on the abundance and diversity of gut microbiota in PD mice. (A) Results of the alpha-diversity evaluation according to each index. (B) PCoA and NMDS results of beta diversity.

## Discussion

Ginseng has complex active components, and the chemical composition of ginseng extracts obtained under different processing conditions varies greatly [37]. The choice of temperature and solvent influenced the ratio of various chemical components in the extract of ginseng [38]. Kim et al. found that the content of protopanaxadiol (PPD)-type ginsenosides in ginseng decreased with increasing temperature, whereas the content of protopanaxatriol (PPT)-type ginsenosides increased after high temperature conversion, and the content of some ginsenosides, such as ginsenoside Rf, decreased with increasing temperature [39-41]. The conventional

method of high -temperature extraction of ginseng broke down the proteins in ginseng, resulting in a near-absent protein content in the resulting sample [42-44]. The contents of polysaccharides, ginsenosides, and proteins in ginseng were 40%, 4%, and 10%, respectively [45-47]. In this study, the contents of ginseng polysaccharides, ginsenosides, and proteins in WEG obtained using mild extraction conditions of low temperature and water extraction were 26.58%, 3.85%, and 7.36%, respectively. Our study was statistically evaluated with behavioral and histopathological data from mice. We found that WEG had a significant ameliorative effect on MPTP-induced PD mice, based on the pharmacological effects exerted by the joint coordination between the three main compounds in WEG. For MPTP-induced impairment of brain  $\alpha$ -Syn accumulation in mice, our study found that oral administration of WEG was sufficient to reduce brain  $\alpha$ -Syn accumulation and increase TH content in PD mice.

MPTP freely crosses the blood–brain barrier and is converted to MPP<sup>+</sup> in the brain by astrocytes. MPP<sup>+</sup> is selectively taken up by dopaminergic cells and inhibits mitochondrial complexes in the respiratory chain [48]. MPTP toxicity-induced PD models are well-established animal models, and numerous studies have shown that MPTP can cause impaired learning memory in humans, mice, and primates [49]. MPTP is the only environmental factor directly associated with the development of levodopa-responsive PD, which is clinically indistinguishable from PD. Similar chemicals abound, however, supporting the hypothesis that substances in the environment may contribute to this disorder [50]. Some scholars found that ginsenoside Rb<sub>1</sub> could alleviate MPTP-induced gait kinetic dysfunction and cognitive impairment in mice, suggesting that ginsenoside Rb<sub>1</sub> has neuroprotective mechanisms in PD mice [51]. We performed pathological studies on the hippocampal CA1 and striatum of MPTP-injured mice and the small intestine of mice and discovered that damaged neuronal cells in the CA1 and striatum of WEG-treated mice were improved, and the number of neuronal cells increased and the cell morphology largely returned to normal after treatment with WEG. Furthermore, WEG also had a significant therapeutic effect on the damaged mice intestine, with improvements in the damaged intestinal mucosa and small intestinal glands, and a corresponding increase in the digestion and absorption of nutrients.

People with PD suffer from clinical manifestations of tremor, muscle tonus, motor bradykinesia, and postural dysreflexia. Its main pathological manifestations are pathophysiological loss or degeneration of dopaminergic neurons in the midbrain substantia nigra and the development of neuronal Lewy bodies with reduced striatal dopamine levels. Moreover, PD is based on the brain, so the examination of learning and memory abilities is also the focus of behavioral tests in mice [52-56]. Success in simulating working memory deficits and other cognitive impairments in PD also have been reported for the MPTP model [57-60]. First, we used behavioral tests, such as the pole test, to determine the strength of the limbs as a basis for the presence of motor deficits in mice. MPTP altered the locomotor ability of the mice, suggesting that these mice had a locomotor deficit, whereas treatment with WEG improved the mice's locomotor impairment well, which was consistent with our previously hypothesized results. Notably, the results of the Morris water maze test provided a more intuitive sense that WEG could improve motor retardation and learning memory abilities in mice. These results support the finding that WEG can improve spatial learning and cognitive abilities in mice already disturbed by MPTP in in vivo experiments.  $\alpha$ -Syn, a key protein in PD development, and Lewy bodies formed by  $\alpha$ -Syn aggregation are the main pathological features of PD [61].

Min et al. proposed that gintonin, a glycolipid protein isolated from ginseng, has some neuroprotective effects. Gintonin's neuroprotective effects were associated with reduced accumulation of  $\alpha$ -Syn in the substantia nigra and striatum of MPTP-induced PD mice, and the neuroprotective effect of gintonin was further validated via analyzing the effect of gintonin on MPP<sup>+</sup> treated SH-SY5Y cells [62]. This result is consistent with the findings in this study that WEG intervention reduced the accumulation of  $\alpha$ -Syn and thus acted as a neuroprotective agent. This finding also revealed that WEG has played a role in resisting the progression of PD, and the results of both WB and IHC experiments suggested that WEG clearance of  $\alpha$ -Syn appears to be more effective than CLCRT given alone. Additionally, it is important to measure the TH levels in the brain. TH catalyzes the rate-limiting step in the synthesis of the neurotransmitter dopamine and other catecholamines. TH enzymes play an important role in dopamine synthesis and are abundant in dopaminergic neurons. Therefore, TH is used as a marker of dopaminergic neurons and plays an important role in the pathophysiology of PD [63]. Establishing the beneficial effect of gintonin on MPTP-induced nigrostriatal TH loss in previous reports has confirmed the hypothesis that gintonin can restore reduced TH expression in MPTP-treated mice [64]. We found that the MPTP-induced decrease in TH levels in the mouse brain and the intervention of WEG modulated the increase in intracranial TH levels, thus preventing the loss of TH in the skull and acting as a neuroprotective agent.

Early studies have found that the etiology of PD may originate in the gut [65]. Researchers detected  $\alpha$ -Syn in the intestinal mucosa and submucosal nerve fibers of PD patients, and found that  $\alpha$ -Syn in the gut could be transported to the brain through the vagus nerve, thus providing a basis for the hypothesis that the origin of PD may come from outside the brain in the gut [66]. Changes in the composition of the gut microflora also have been observed in the intestines of patients with PD [67]. When mice were cocolonized with the flora of PD patients by the fecal microbiota transplantation technique, the mice exhibited typical signs of PD such as motor deficits and neuroinflammation [68]. Previous studies have reported that MPTP induction can increase the number of some pathogens and have confirmed that MPTP neurotoxicity to the brain can lead to intestinal dysfunction and ultimately alter gut flora in PD patients [69-70]. This study confirmed that MPTP did have a detrimental effect on the intestine and gut microbiota of mice, whereas WEG not only improved the intestinal tissues, but also had the ability to improve the disordered flora of mice. WEG increased the proportion of Firmicutes and decreased the proportion of Bacteroidetes in the intestine of mice and repaired the disordered gut microbiota, resulting in a normal regulation of the active system of the flora. The gut microbiota is complex in structure and consists of four main bacterial phyla. The thick-walled phylum is predominant (50–75%), followed by the phylum *Bacteroides* (10–50%), the phylum Actinomycetes, and the phylum Aspergillus [71]. Elevated flora of either phylum will affect the levels of other species and lead to disorders. We found a decrease in *Lactobacillus* abundance in the model group and a significant increase with oral WEG, and other studies also have confirmed that elevated values of *Lactobacillus* abundance are important for improving the gut microbiota environment [72-73]. The high dose of WEG in this study improved PD and also had an effect on the gut microbiota of the mice. Even though the high dose of WEG had the best effect on the repair of the intestinal environment, the treatment was better for the low dose of WEG. Thus, the hypothesis that an imbalance of gut microbiota may indirectly contribute to the pathogenesis of PD is further supported by the fact that the mechanism of

change in gut microbiota regulation by WEG. Whether or not WEG can be used in combination with CLCRT needs to be further explored. Also, our study has not investigated which metabolic pathways are involved in the neuroprotective mechanism of WEG improvement in PD mice, and this pathway should be investigated in subsequent experiments.

## Conclusion

This study used a low-temperature extraction technique to obtain WEG with high retention of active ingredients, and MPTP intraperitoneal injection was used to construct an in vivo PD model. We demonstrated that WEG could repair intestinal damage and improve gut microbiota dysbiosis in PD mice. We also demonstrated that WEG could significantly improve behavioral functions and inhibit the accumulation of  $\alpha$ -Syn in the brain via regulating the level of TH in the brain, thus exerting neuroprotective effects in PD mice. The study provides a new approach to the pharmacological treatment of PD, further supports the hypothesis that the pathogenesis of PD is related to the gut, and offers a research basis for whether WEG may be a suitable treatment for other degenerative diseases.

## Ethics Statements

Animals was raised and experimented according to the guidance of the Animal Care Committee of Changchun University of Chinese Medicine.

CRedit authorship contribution statement

**Ning Xu**: Methodology, Investigation, Software, Formal analysis, Writing–original draft, Writing–review & editing, Visualization. **Shuyang Xing**: Methodology, Writing –review & editing. **Jie Li**: Project administration, Formal analysis, Data curation. **Bo Pang**: Methodology, Data curation. **Meichen Liu**: Methodology, Writing–review & editing, Funding acquisition. **Meiling Fan**: Resources, Project administration. **Yu Zhao**: Conceptualization, Methodology, Resources, Formal analysis, Investigation, Writing–original draft, Funding acquisition, Supervision.

## Declaration of Competing Interest

The authors declare that they have no known competing financial interests or personal relationships that could have appeared to influence the work reported in this paper.

## References

- [1] Samii, A., Nutt, J. G., & Ransom, B. R. (2004). Parkinson's disease. *Lancet* (London, England), 363(9423), 1783–1793. [https://doi.org/10.1016/S0140-6736\(04\)16305-8](https://doi.org/10.1016/S0140-6736(04)16305-8)
- [2] Reich, S. G., & Savitt, J. M. (2019). Parkinson's Disease. *The Medical clinics of North America*, 103(2), 337–350. <https://doi.org/10.1016/j.mcna.2018.10.014>
- [3] Chao, Y. X., Gulam, M. Y., Chia, N., Feng, L., Rotzschke, O., & Tan, E. K. (2020). Gut-Brain Axis: Potential Factors Involved in the Pathogenesis of Parkinson's Disease. *Frontiers in neurology*, 11, 849. <https://doi.org/10.3389/fneur.2020.00849>
- [4] Peterson C. T. (2020). Dysfunction of the Microbiota-Gut-Brain Axis in Neurodegenerative Disease: The Promise of Therapeutic Modulation with Prebiotics, Medicinal Herbs, Probiotics, and Synbiotics. *Journal of evidence-based integrative medicine*, 25, 2515690X20957225. <https://doi.org/10.1177/2515690X20957225>
- [5] Sung, H. Y., Park, J. W., & Kim, J. S. (2014). The frequency and severity of gastrointestinal symptoms in patients with early Parkinson's disease. *Journal of movement disorders*, 7(1),

- 7–12. <https://doi.org/10.14802/jmd.14002>
- [6] Klingelhoefer, L., & Reichmann, H. (2015). Pathogenesis of Parkinson disease--the gut-brain axis and environmental factors. *Nature reviews. Neurology*, 11(11), 625–636. <https://doi.org/10.1038/nrneurol.2015.197>
- [7] Mulak, A., & Bonaz, B. (2015). Brain-gut-microbiota axis in Parkinson's disease. *World journal of gastroenterology*, 21(37), 10609–10620. <https://doi.org/10.3748/wjg.v21.i37.10609>
- [8] Keshavarzian, A., Green, S. J., Engen, P. A., Voigt, R. M., Naqib, A., Forsyth, C. B., Mutlu, E., & Shannon, K. M. (2015). Colonic bacterial composition in Parkinson's disease. *Movement disorders: official journal of the Movement Disorder Society*, 30(10), 1351–1360. <https://doi.org/10.1002/mds.26307>
- [9] Houser, M. C., & Tansey, M. G. (2017). The gut-brain axis: is intestinal inflammation a silent driver of Parkinson's disease pathogenesis. *NPJ Parkinson's disease*, 3, 3. <https://doi.org/10.1038/s41531-016-0002-0>
- [10] Zhang Y, Xu S, Qian Y. (2023). Sodium butyrate ameliorates gut dysfunction and motor deficits in a mouse model of Parkinson's disease by regulating gut microbiota [J]. *Frontiers in Aging Neuroscience*, 151099018-1099018. <https://doi.org/10.3389/FNAGI.2023.1099018>
- [11] Mulak Agata, Bonaz Bruno. (2015). Brain-gut-microbiota axis in Parkinson's disease.[J]. *World journal of gastroenterology*, 21(37), 10609-20. <https://doi.org/10.3748/wjg.v21.i37.10609>
- [12] Houser Madelyn C; Tansey Malú G. (2017). The gut-brain axis: is intestinal inflammation a silent driver of Parkinson's disease pathogenesis?. *NPJ Parkinson's disease*, 3(12), 3. <https://doi.org/10.1038/s41531-016-0002-0>
- [13] Nutt, J. G., Curtze, C., Hiller, A., Anderson, S., Larson, P. S., Van Laar, A. D., Richardson, R. M., Thompson, M. E., Sedkov, A., Leinonen, M., Ravina, B., Bankiewicz, K. S., & Christine, C. W. (2020). Aromatic L-Amino Acid Decarboxylase Gene Therapy Enhances Levodopa Response in Parkinson's Disease. *Movement disorders: official journal of the Movement Disorder Society*, 35(5), 851–858. <https://doi.org/10.1002/mds.27993>
- [14] Chen, L. W., Wang, Y. Q., Wei, L. C., Shi, M., & Chan, Y. S. (2007). Chinese herbs and herbal extracts for neuroprotection of dopaminergic neurons and potential therapeutic treatment of Parkinson's disease. *CNS & neurological disorders drug targets*, 6(4), 273–281. <https://doi.org/10.2174/187152707781387288>
- [15] Pérez-Hernández, J., Zaldívar-Machorro, V. J., Villanueva-Porras, D., Vega-Ávila, E., & Chavarría, A. (2016). A Potential Alternative against Neurodegenerative Diseases: Phytodrugs. *Oxidative medicine and cellular longevity*, 2016, 8378613. <https://doi.org/10.1155/2016/8378613>
- [16] Attele, A. S., Wu, J. A., & Yuan, C. S. (1999). Ginseng pharmacology: multiple constituents and multiple actions. *Biochemical pharmacology*, 58(11), 1685–1693. [https://doi.org/10.1016/s0006-2952\(99\)00212-9](https://doi.org/10.1016/s0006-2952(99)00212-9)
- [17] Kim, H. J., Kim, P., & Shin, C. Y. (2013). A comprehensive review of the therapeutic and pharmacological effects of ginseng and ginsenosides in central nervous system. *Journal of ginseng research*, 37(1), 8–29. <https://doi.org/10.5142/jgr.2013.37.8>
- [18] Gao, Q. G., Chen, W. F., Xie, J. X., & Wong, M. S. (2009). Ginsenoside Rg<sub>1</sub> protects

- against 6-OHDA-induced neurotoxicity in neuroblastoma SK-N-SH cells via IGF-I receptor and estrogen receptor pathways. *Journal of neurochemistry*, 109(5), 1338–1347. <https://doi.org/10.1111/j.1471-4159.2009.06051.x>
- [19] Effects of Panax ginseng in Neurodegenerative Diseases. *Journal of ginseng research*, 36(4), 342–353. <https://doi.org/10.5142/jgr.2012.36.4.342>
- [20] Van Kampen, J. M., Baranowski, D. B., Shaw, C. A., & Kay, D. G. (2014). Panax ginseng is neuroprotective in a novel progressive model of Parkinson's disease. *Experimental gerontology*, 50, 95–105. <https://doi.org/10.1016/j.exger.2013.11.012>
- [21] Li, Q., Rubin, L., Silva, M., Li, S., Yang, C., Lazarovici, P., & Zheng, W. (2022). Current Progress on Neuroprotection Induced by Artemisia, Ginseng, Astragalus, and Ginkgo Traditional Chinese Medicines for the Therapy of Alzheimer's Disease. *Oxidative medicine and cellular longevity*, 2022, 3777021. <https://doi.org/10.1155/2022/3777021>
- [22] Jiang, Y., Li, Z., Liu, Y., Liu, X., Chang, Q., Liao, Y., & Pan, R. (2015). Neuroprotective effect of water extract of Panax ginseng on corticosterone-induced apoptosis in PC12 cells and its underlying molecule mechanisms. *Journal of ethnopharmacology*, 159, 102–112. <https://doi.org/10.1016/j.jep.2014.10.062>
- [23] Van Kampen, J., Robertson, H., Hagg, T., & Drobitch, R. (2003). Neuroprotective actions of the ginseng extract G115 in two rodent models of Parkinson's disease. *Experimental neurology*, 184(1), 521–529. <https://doi.org/10.1016/j.expneurol.2003.08.002>
- [24] Wang, J., Sun, C., Zheng, Y., Pan, H., Zhou, Y., & Fan, Y. (2014). The effective mechanism of the polysaccharides from Panax ginseng on chronic fatigue syndrome. *Archives of pharmacal research*, 37(4), 530–538. <https://doi.org/10.1007/s12272-013-0235-y>
- [25] Jiao, L., Li, J., Liu, F., Wang, J., Jiang, P., Li, B., Li, H., Chen, C., & Wu, W. (2021). Characterisation, Chain Conformation and Antifatigue Effect of Steamed Ginseng Polysaccharides with Different Molecular Weight. *Frontiers in pharmacology*, 12, 712836. <https://doi.org/10.3389/fphar.2021.712836>
- [26] Wang, W., Liu, X., Liu, J., Cai, E., Zhao, Y., Li, H., Zhang, L., Li, P., & Gao, Y. (2018). Sesquiterpenoids from the Root of Panax ginseng Attenuates Lipopolysaccharide-Induced Depressive-Like Behavior through the Brain-Derived Neurotrophic Factor/Tropomyosin-Related Kinase B and Sirtuin Type 1/Nuclear Factor- $\kappa$ B Signaling Pathways. *Journal of agricultural and food chemistry*, 66(1), 265–271. <https://doi.org/10.1021/acs.jafc.7b04835>
- [27] Zheng, X., Zhai J., Li, H., Zhao, L., Gao, Z. (2020). Effect of ginseng polysaccharide on apoptosis in the hippocampus of rats with cerebral hemorrhage. *Chinese Journal of Difficult and Complicated Cases*, 19(04):394-398. <https://doi:10.3969/j.issn.1671-6450.2020.04.016>
- [28] Liu, X., Wang, L., Wen, A., Yang, J., Yan, Y., Song, Y., Liu, X., Ren, H., Wu, Y., Li, Z., Chen, W., Xu, Y., Li, L., Xia, J., & Zhao, G. (2012). Ginsenoside-Rd improves outcome of acute ischaemic stroke - a randomized, double-blind, placebo-controlled, multicenter trial. *European journal of neurology*, 19(6), 855–863. <https://doi.org/10.1111/j.1468-1331.2011.03634.x>
- [29] Xu, L., Chen, W. F., & Wong, M. S. (2009). Ginsenoside Rg<sub>1</sub> protects dopaminergic neurons in a rat model of Parkinson's disease through the IGF-I receptor signalling pathway. *British journal of pharmacology*, 158(3), 738–748. <https://doi.org/10.1111/j.1476-5381.2009.00361.x>



- [30] Chen, C., Zhang, H., Xu, H., Zheng, Y., Wu, T., & Lian, Y. (2019). Ginsenoside Rb<sub>1</sub> ameliorates cisplatin-induced learning and memory impairments. *Journal of ginseng research*, 43(4), 499–507. <https://doi.org/10.1016/j.jgr.2017.07.009>
- [31] Yang X, Dong B, An L, Zhang Q, Chen Y, Wang H. (2021). Ginsenoside Rb<sub>1</sub> ameliorates Glycemic Disorder in Mice with High Fat Diet-Induced Obesity via Regulating Gut Microbiota and Amino Acid Metabolism. *Frontiers in Pharmacology*, 12756491-756491. <https://doi.org/10.3389/FPHAR.2021.756491>
- [32] Bai X, Fu R, Duan Z, Wang P, Zhu Ch. (2021). Ginsenoside Rk<sub>3</sub> alleviates gut microbiota dysbiosis and colonic inflammation in antibiotic-treated mice. *Food Research International*, 146110465-110465. <https://doi.org/10.1016/J.FOODRES.2021.110465>
- [33] Li, H., Kang, T., Qi, B., Kong, L., Jiao, Y., Cao, Y., Zhang, J., & Yang, J. (2016). Neuroprotective effects of ginseng protein on PI3K/Akt signaling pathway in the hippocampus of D-galactose/AlCl<sub>3</sub> inducing rats model of Alzheimer's disease. *Journal of ethnopharmacology*, 179, 162–169. <https://doi.org/10.1016/j.jep.2015.12.020>
- [34] Liu, M., Yu, S., Wang, J., Qiao, J., Liu, Y., Wang, S., & Zhao, Y. (2020). Ginseng protein protects against mitochondrial dysfunction and neurodegeneration by inducing mitochondrial unfolded protein response in *Drosophila melanogaster* PINK1 model of Parkinson's disease. *Journal of ethnopharmacology*, 247, 112213. <https://doi.org/10.1016/j.jep.2019.112213>
- [35] Ryu, J., Lee, H. W., Yoon, J., Seo, B., Kwon, D. E., Shin, U. M., Choi, K. J., & Lee, Y. W. (2017). Effect of hydrothermal processing on ginseng extract. *Journal of ginseng research*, 41(4), 572–577. <https://doi.org/10.1016/j.jgr.2016.12.002>
- [36] Karmazyn, M., & Gan, X. T. (2021). Chemical components of ginseng, their biotransformation products and their potential as treatment of hypertension. *Molecular and cellular biochemistry*, 476(1), 333–347. <https://doi.org/10.1007/s11010-020-03910-8>
- [37] Liu, H., Lu, X., Hu, Y., & Fan, X. (2020). Chemical constituents of *Panax ginseng* and *Panax notoginseng* explain why they differ in therapeutic efficacy. *Pharmacological research*, 161, 105263. <https://doi.org/10.1016/j.phrs.2020.105263>
- [38] Wang, C. Q., Yi, L. W., Zhao, L., Zhou, Y. Z., Guo, F., Huo, Y. S., Zhao, D. Q., Xu, F., Wang, X., & Cai, S. Q. (2021). 177 Saponins, Including 11 New Compounds in Wild Ginseng Tentatively Identified via HPLC-IT-TOF-MSn, and Differences among Wild Ginseng, Ginseng under Forest, and Cultivated Ginseng. *Molecules (Basel, Switzerland)*, 26(11), 3371. <https://doi.org/10.3390/molecules26113371>
- [39] Kim, C. J., Kim, B. M., Kim, C. S., Baek, J. Y., & Jung, I. C. (2020). Variations in Ginsenosides of Raw Ginseng According to Heating Temperature and Time. *Journal of pharmacopuncture*, 23(2), 79–87. <https://doi.org/10.3831/KPI.2020.23.012>
- [40] Li, H., Jiang, H., Xu, L., Deng, Y., Xu, J., & Zhao, Y. (2022). Effects of Different Extraction Methods in Pharmacopoeia on the Content and Structure Transformation of Ginsenosides. *Molecules*, 27(14), 4347. <https://doi.org/10.3390/molecules27144347>
- [41] Chen, W., Balan, P., & Popovich, D. G. (2020). Changes of Ginsenoside Composition in the Creation of Black Ginseng Leaf. *Molecules*, 25(12), 2809. <https://doi.org/10.3390/molecules25122809>
- [42] Potin, F., Lubbers, S., Husson, F., & Saurel, R. (2019). Hemp (*Cannabis sativa* L.) Protein Extraction Conditions Affect Extraction Yield and Protein Quality. *Journal of food science*,

- 84(12), 3682–3690. <https://doi.org/10.1111/1750-3841.14850>
- [43] Scepankova, H., Martins, M., Estevinho, L., Delgado, I., & Saraiva, J. A. (2018). Enhancement of Bioactivity of Natural Extracts by Non-Thermal High Hydrostatic Pressure Extraction. *Plant foods for human nutrition*, 73(4), 253–267. <https://doi.org/10.1007/s11130-018-0687-9>
- [44] Sarnaik, A., Mhatre, A., Faisal, M., Smith, D., Davis, R., & Varman, A. M. (2021). Novel perspective on a conventional technique: Impact of ultra-low temperature on bacterial viability and protein extraction. *PloS one*, 16(5), e0251640. <https://doi.org/10.1371/journal.pone.0251640>
- [45] Zhao, J. L., Zhang, M., & Zhou, H. L. (2019). Microwave-Assisted Extraction, Purification, Partial Characterization, and Bioactivity of Polysaccharides from *Panax ginseng*. *Molecules* (Basel, Switzerland), 24(8), 1605. <https://doi.org/10.3390/molecules24081605>
- [46] Ru, W., Wang, D., Xu, Y., He, X., Sun, Y. E., Qian, L., Zhou, X., & Qin, Y. (2015). Chemical constituents and bioactivities of *Panax ginseng* (C. A. Mey.). *Drug discoveries & therapeutics*, 9(1), 23–32. <https://doi.org/10.5582/ddt.2015.01004>
- [47] Zhao, B., Lv, C., & Lu, J. (2019). Natural occurring polysaccharides from *Panax ginseng* C. A. Meyer: A review of isolation, structures, and bioactivities. *International journal of biological macromolecules*, 133, 324–336. <https://doi.org/10.1016/j.ijbiomac.2019.03.229>
- [48] Bhurtel, S., Bok, E., Katila, N., Kim, J., & Choi, D. Y. (2021). Activation of Nrf2 by methylene blue is associated with the neuroprotection against MPP+ induced toxicity via ameliorating oxidative stress and mitochondrial dysfunction. *Biochemical pharmacology*, 192, 114719. <https://doi.org/10.1016/j.bcp.2021.114719>
- [49] Morissette, M., Morin, N., Grégoire, L., Rajput, A., Rajput, A. H., & Di Paolo, T. (2016). Brain  $\alpha 7$  nicotinic acetylcholine receptors in MPTP-lesioned monkeys and parkinsonian patients. *Biochemical pharmacology*, 109, 62–69. <https://doi.org/10.1016/j.bcp.2016.03.023>
- [50] Tranchant C. (2019). Introduction and classical environmental risk factors for Parkinson. *Revue neurologique*, 175(10), 650–651. <https://doi.org/10.1016/j.neurol.2019.04.006>
- [51] Liu, Y., Zong, X., Huang, J., Guan, Y., Li, Y., Du, T., Liu, K., Kang, X., Dou, C., Sun, X., Wu, R., Wen, L., & Zhang, Y. (2019). Ginsenoside Rb1 regulates prefrontal cortical GABAergic transmission in MPTP-treated mice. *Aging*, 11(14), 5008–5034. <https://doi.org/10.18632/aging.102095>
- [52] Sasikumar, S., & Strafella, A. P. (2020). Imaging Mild Cognitive Impairment and Dementia in Parkinson's Disease. *Frontiers in neurology*, 11, 47. <https://doi.org/10.3389/fneur.2020.00047>
- [53] Orgeta, V., McDonald, K. R., Poliakoff, E., Hindle, J. V., Clare, L., & Leroi, I. (2020). Cognitive training interventions for dementia and mild cognitive impairment in Parkinson's disease. *The Cochrane database of systematic reviews*, 2(2), CD011961. <https://doi.org/10.1002/14651858.CD011961.pub2>
- [54] Christopher, L., Marras, C., Duff-Canning, S., Koshimori, Y., Chen, R., Boileau, I., Segura, B., Monchi, O., Lang, A. E., Rusjan, P., Houle, S., & Strafella, A. P. (2014). Combined insular and striatal dopamine dysfunction are associated with executive deficits in Parkinson's disease with mild cognitive impairment. *Brain: a journal of neurology*, 137(Pt 2), 565–575. <https://doi.org/10.1093/brain/awt337>

- [55] Braak, H., de Vos, R. A., Bohl, J., & Del Tredici, K. (2006). Gastric alpha-synuclein immunoreactive inclusions in Meissner's and Auerbach's plexuses in cases staged for Parkinson's disease-related brain pathology. *Neuroscience letters*, 396(1), 67–72. <https://doi.org/10.1016/j.neulet.2005.11.012>
- [56] Pont-Sunyer, C., Hotter, A., Gaig, C., Seppi, K., Compta, Y., Katzenschlager, R., Mas, N., Hofeneder, D., Brücke, T., Bayés, A., Wenzel, K., Infante, J., Zach, H., Pirker, W., Posada, I. J., Álvarez, R., Ispuerto, L., De Fàbregues, O., Callén, A., Palasí, A., ... Tolosa, E. (2015). The onset of nonmotor symptoms in Parkinson's disease (the ONSET PD study). *Movement disorders: official journal of the Movement Disorder Society*, 30(2), 229–237. <https://doi.org/10.1002/mds.26077>
- [57] Pflibsen, L., Stang, K. A., Sconce, M. D., Wilson, V. B., Hood, R. L., Meshul, C. K., & Mitchell, S. H. (2015). Executive function deficits and glutamatergic protein alterations in a progressive 1-methyl-4-phenyl-1,2,3,6-tetrahydropyridine mouse model of Parkinson's disease. *Journal of neuroscience research*, 93(12), 1849–1864. <https://doi.org/10.1002/jnr.23638>
- [58] Durand, E., Petit, O., Tremblay, L., Zimmer, C., Sgambato-Faure, V., Chassain, C., Laurent, M., Pereira, B., Silberberg, C., & Durif, F. (2015). Social behavioral changes in MPTP-treated monkey model of Parkinson's disease. *Frontiers in behavioral neuroscience*, 9, 42. <https://doi.org/10.3389/fnbeh.2015.00042>
- [59] Lai, F., Jiang, R., Xie, W., Liu, X., Tang, Y., Xiao, H., Gao, J., Jia, Y., & Bai, Q. (2018). Intestinal Pathology and Gut Microbiota Alterations in a Methyl-4-phenyl-1,2,3,6-tetrahydropyridine (MPTP) Mouse Model of Parkinson's Disease. *Neurochemical research*, 43(10), 1986–1999. <https://doi.org/10.1007/s11064-018-2620-x>
- [60] Maiti, P., Gregg, L. C., & McDonald, M. P. (2016). MPTP-induced executive dysfunction is associated with altered prefrontal serotonergic function. *Behavioural brain research*, 298(Pt B), 192–201. <https://doi.org/10.1016/j.bbr.2015.09.014>
- [61] Dehay, B., Bourdenx, M., Gorry, P., Przedborski, S., Vila, M., Hunot, S., Singleton, A., Olanow, C. W., Merchant, K. M., Bezdard, E., Petsko, G. A., & Meissner, W. G. (2015). Targeting  $\alpha$ -synuclein for treatment of Parkinson's disease: mechanistic and therapeutic considerations. *The Lancet. Neurology*, 14(8), 855–866. [https://doi.org/10.1016/S1474-4422\(15\)00006-X](https://doi.org/10.1016/S1474-4422(15)00006-X)
- [62] Zhang, G., Xia, F., Zhang, Y., Zhang, X., Cao, Y., Wang, L., Liu, X., Zhao, G., & Shi, M. (2016). Ginsenoside Rd Is Efficacious Against Acute Ischemic Stroke by Suppressing Microglial Proteasome-Mediated Inflammation. *Molecular neurobiology*, 53(4), 2529–2540. <https://doi.org/10.1007/s12035-015-9261-8>
- [63] Nagatsu, T., Nakashima, A., Watanabe, H., Ito, S., & Wakamatsu, K. (2022). Neuromelanin in Parkinson's Disease: Tyrosine Hydroxylase and Tyrosinase. *International journal of molecular sciences*, 23(8), 4176. <https://doi.org/10.3390/ijms23084176>
- [64] Choi, J. H., Jang, M., Oh, S., Nah, S. Y., & Cho, I. H. (2018). Multi-Target Protective Effects of Gintonin in 1-Methyl-4-phenyl-1,2,3,6-tetrahydropyridine-Mediated Model of Parkinson's Disease via Lysophosphatidic Acid Receptors. *Frontiers in pharmacology*, 9, 515. <https://doi.org/10.3389/fphar.2018.00515>
- [65] Sampson, T. R., Debelius, J. W., Thron, T., Janssen, S., Shastri, G. G., Ilhan, Z. E., Challis, C., Schretter, C. E., Rocha, S., Gradinaru, V., Chesselet, M. F., Keshavarzian, A., Shannon,

- K. M., Krajmalnik-Brown, R., Wittung-Stafshede, P., Knight, R., & Mazmanian, S. K. (2016). Gut Microbiota Regulate Motor Deficits and Neuroinflammation in a Model of Parkinson's Disease. *Cell*, 167(6), 1469–1480.e12. <https://doi.org/10.1016/j.cell.2016.11.018>
- [66] Gorecki, A. M., Preskey, L., Bakeberg, M. C., Kenna, J. E., Gildenhuis, C., MacDougall, G., Dunlop, S. A., Mastaglia, F. L., Akkari, P. A., Koengten, F., & Anderton, R. S. (2019). Altered Gut Microbiome in Parkinson's Disease and the Influence of Lipopolysaccharide in a Human  $\alpha$ -Synuclein Over-Expressing Mouse Model. *Frontiers in neuroscience*, 13, 839. <https://doi.org/10.3389/fnins.2019.00839>
- [67] Unger, M. M., Spiegel, J., Dillmann, K. U., Grundmann, D., Philippeit, H., Bürmann, J., Faßbender, K., Schwartz, A., & Schäfer, K. H. (2016). Short chain fatty acids and gut microbiota differ between patients with Parkinson's disease and age-matched controls. *Parkinsonism & related disorders*, 32, 66–72. <https://doi.org/10.1016/j.parkreldis.2016.08.019>
- [68] Vendrik, K., Ooijevaar, R. E., de Jong, P., Laman, J. D., van Oosten, B. W., van Hilten, J. J., Ducarmon, Q. R., Keller, J. J., Kuijper, E. J., & Contarino, M. F. (2020). Fecal Microbiota Transplantation in Neurological Disorders. *Frontiers in cellular and infection microbiology*, 10, 98. <https://doi.org/10.3389/fcimb.2020.00098>
- [69] Sun, M. F., Zhu, Y. L., Zhou, Z. L., Jia, X. B., Xu, Y. D., Yang, Q., Cui, C., & Shen, Y. Q. (2018). Neuroprotective effects of fecal microbiota transplantation on MPTP-induced Parkinson's disease mice: Gut microbiota, glial reaction and TLR4/TNF- $\alpha$  signaling pathway. *Brain, behavior, and immunity*, 70, 48–60. <https://doi.org/10.1016/j.bbi.2018.02.005>
- [70] Jang, J. H., Yeom, M. J., Ahn, S., Oh, J. Y., Ji, S., Kim, T. H., & Park, H. J. (2020). Acupuncture inhibits neuroinflammation and gut microbial dysbiosis in a mouse model of Parkinson's disease. *Brain, behavior, and immunity*, 89, 641–655. <https://doi.org/10.1016/j.bbi.2020.08.015>
- [71] Zhang, J., Guo, Z., Xue, Z., Sun, Z., Zhang, M., Wang, L., Wang, G., Wang, F., Xu, J., Cao, H., Xu, H., Lv, Q., Zhong, Z., Chen, Y., Qimuge, S., Menghe, B., Zheng, Y., Zhao, L., Chen, W., & Zhang, H. (2015). A phylo-functional core of gut microbiota in healthy young Chinese cohorts across lifestyles, geography and ethnicities. *The ISME journal*, 9(9), 1979–1990. <https://doi.org/10.1038/ismej.2015.11>
- [72] Wang, L., Zhao, Z., Zhao, L., Zhao, Y., Yang, G., Wang, C., Gao, L., Niu, C., & Li, S. (2022). *Lactobacillus plantarum* DP189 Reduces  $\alpha$ -SYN Aggravation in MPTP-Induced Parkinson's Disease Mice via Regulating Oxidative Damage, Inflammation, and Gut Microbiota Disorder. *Journal of agricultural and food chemistry*, 70(4), 1163–1173. <https://doi.org/10.1021/acs.jafc.1c07711>
- [73] Fu, S. K., Tseng, W. C., Tseng, K. W., Lai, C. C., Tsai, Y. C., Tai, H. L., & Hsu, C. C. (2021). Effect of Daily Oral *Lactobacillus plantarum* PS128 on Exercise Capacity Recovery after a Half-Marathon. *Nutrients*, 13(11), 4023. <https://doi.org/10.3390/nu13114023>

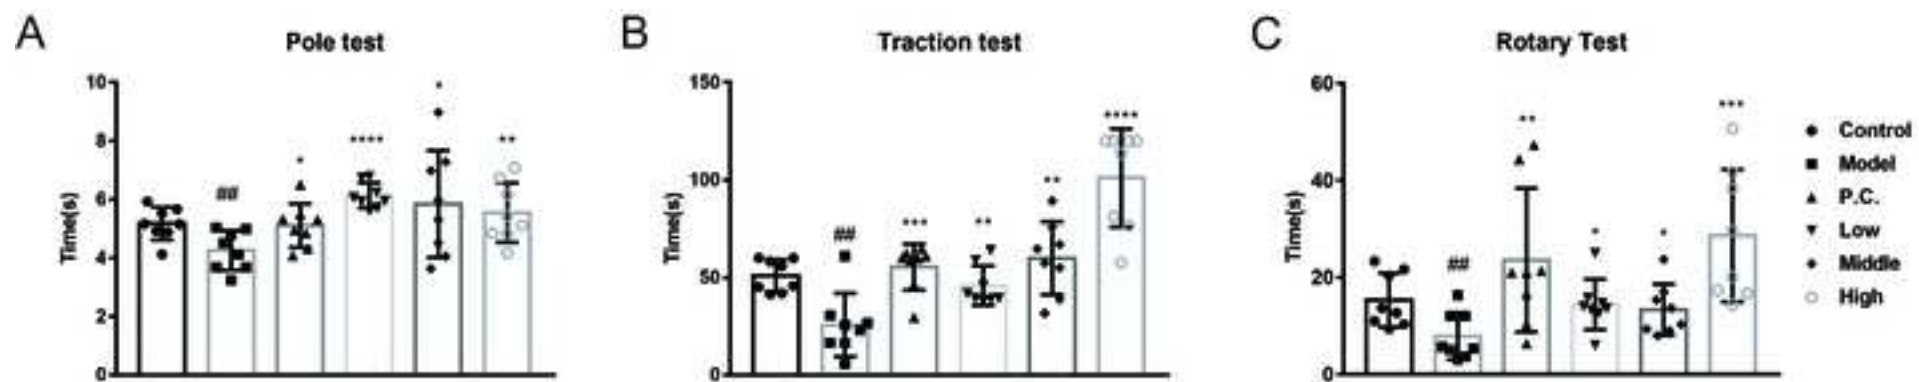

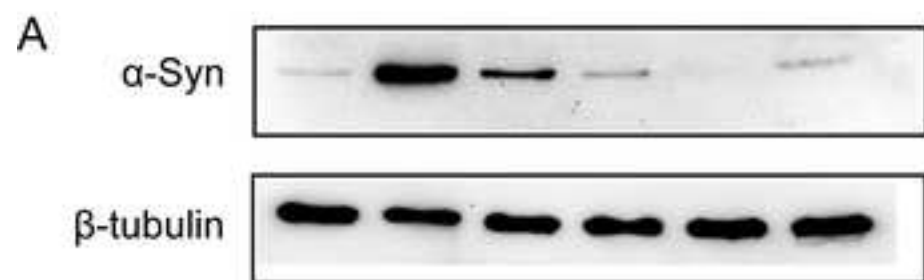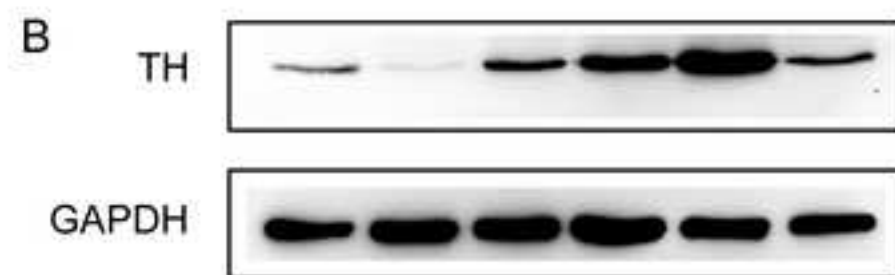

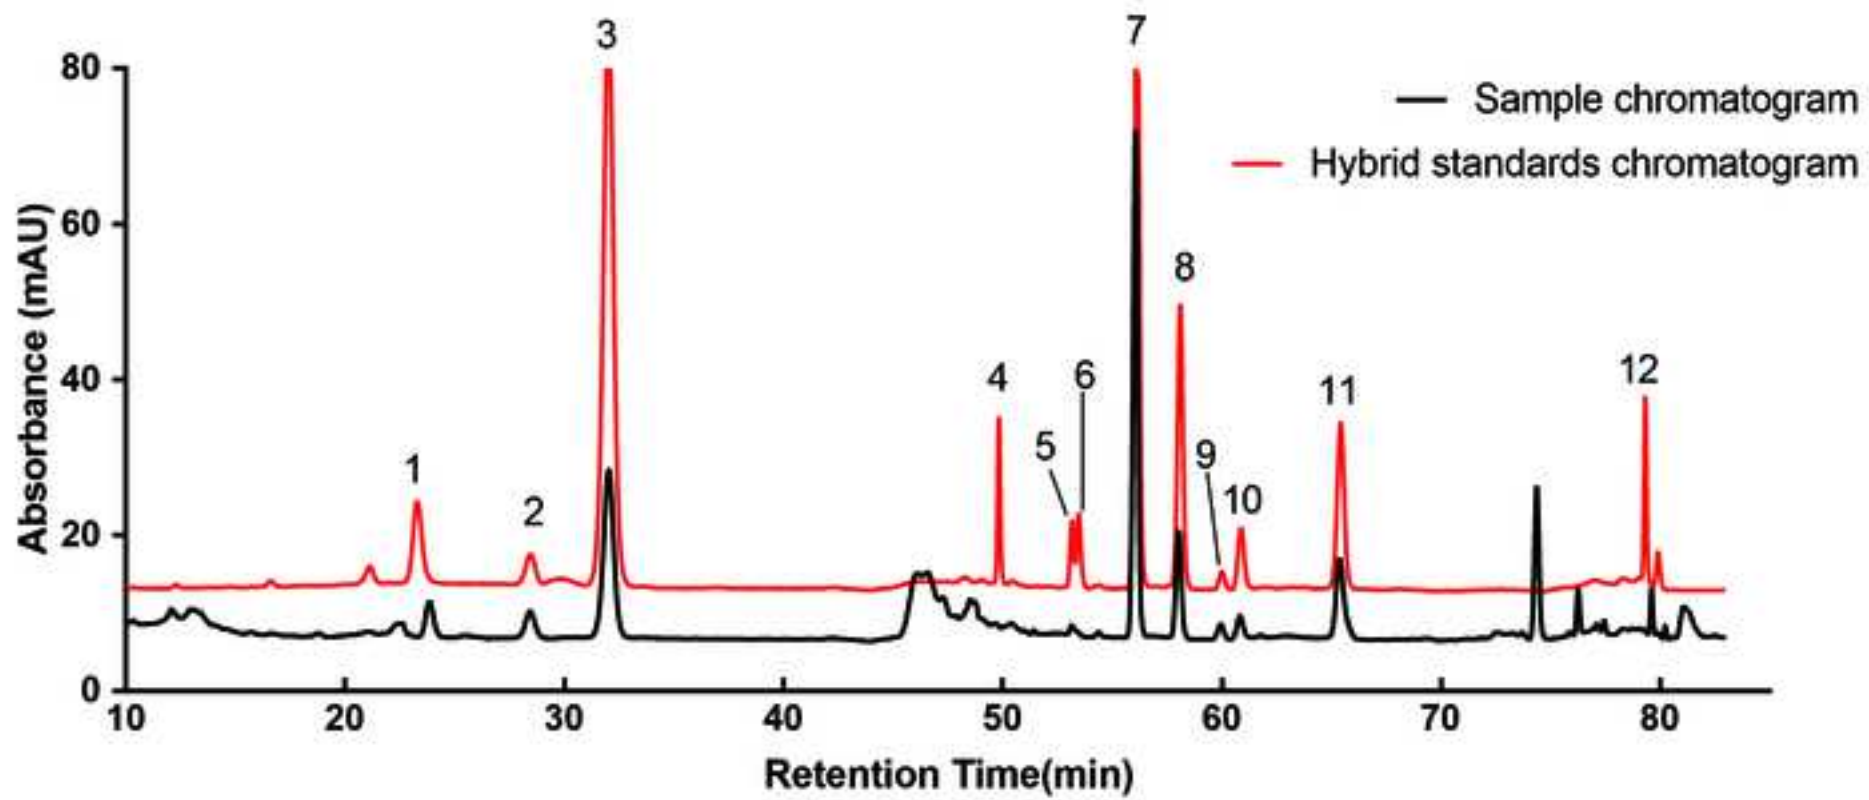

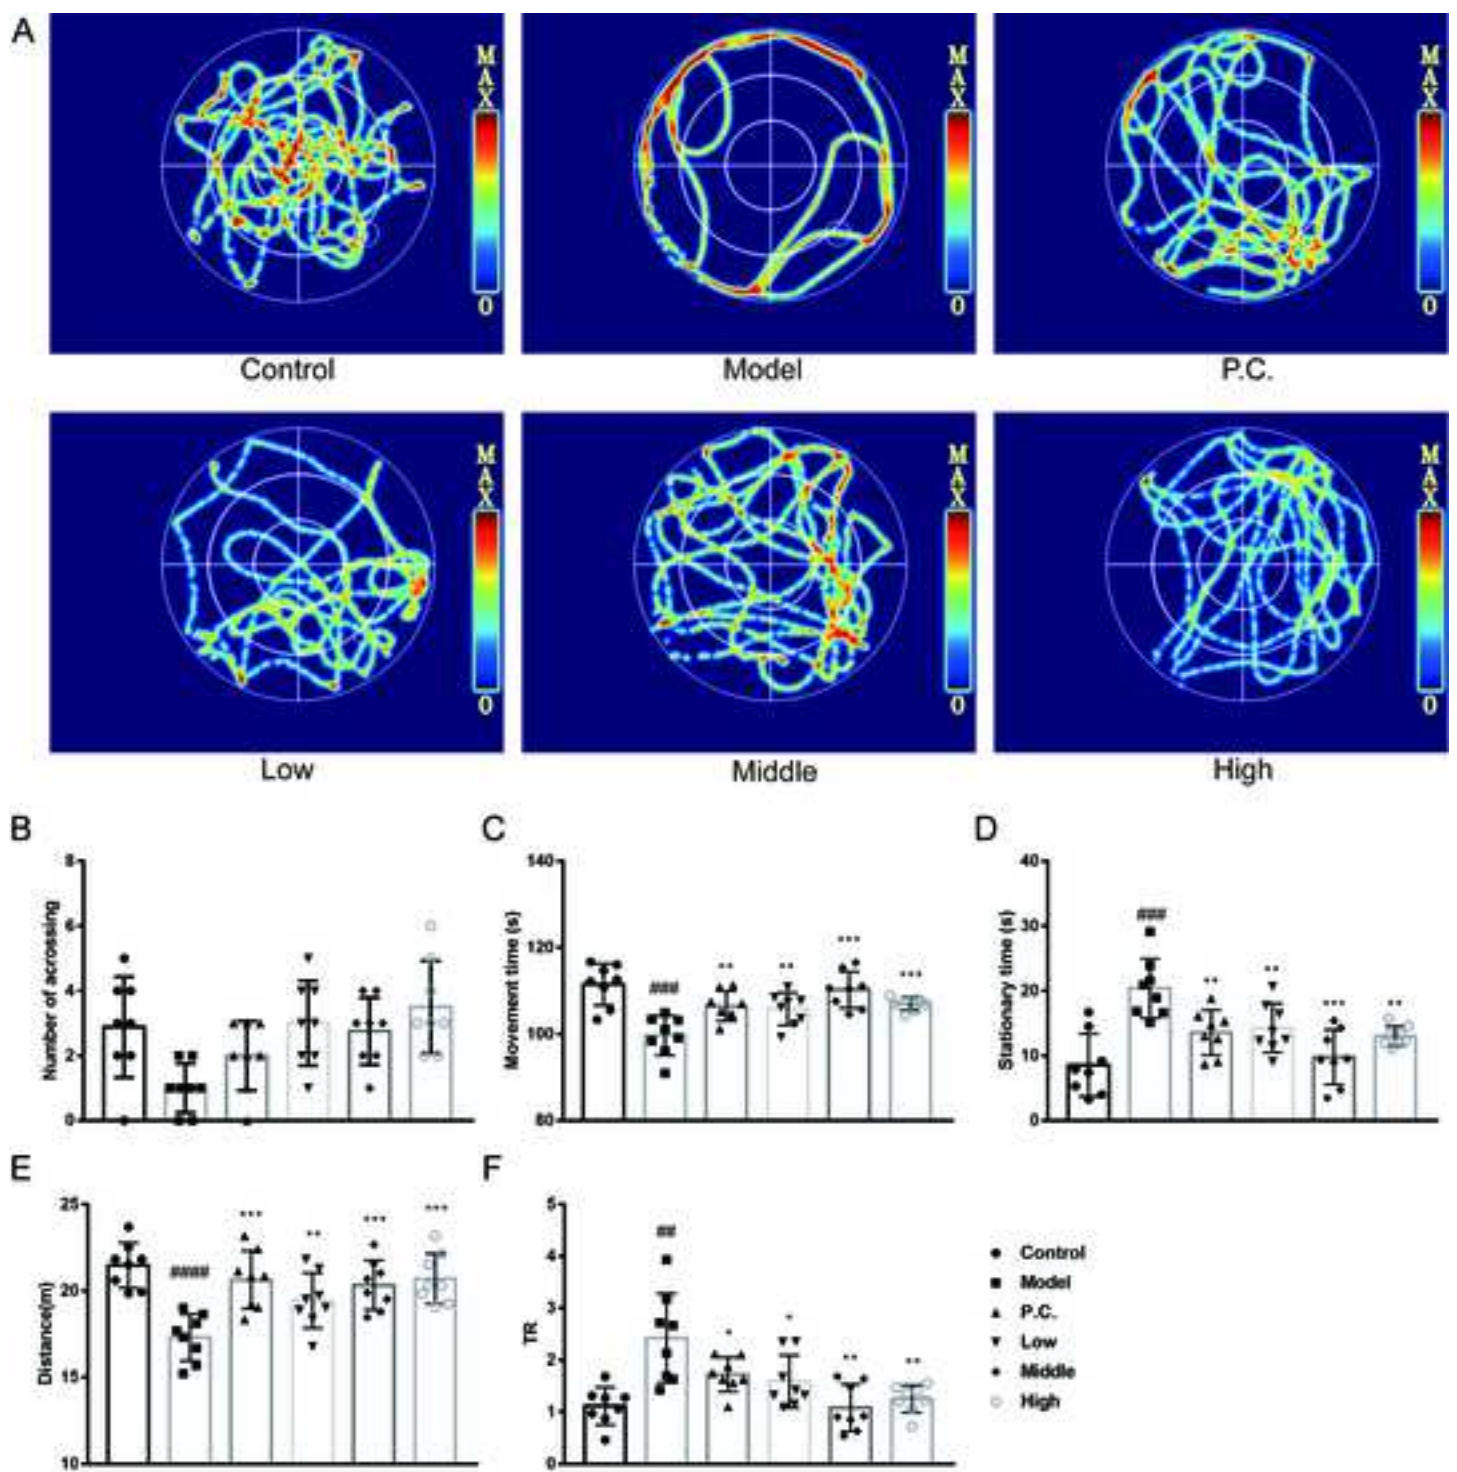



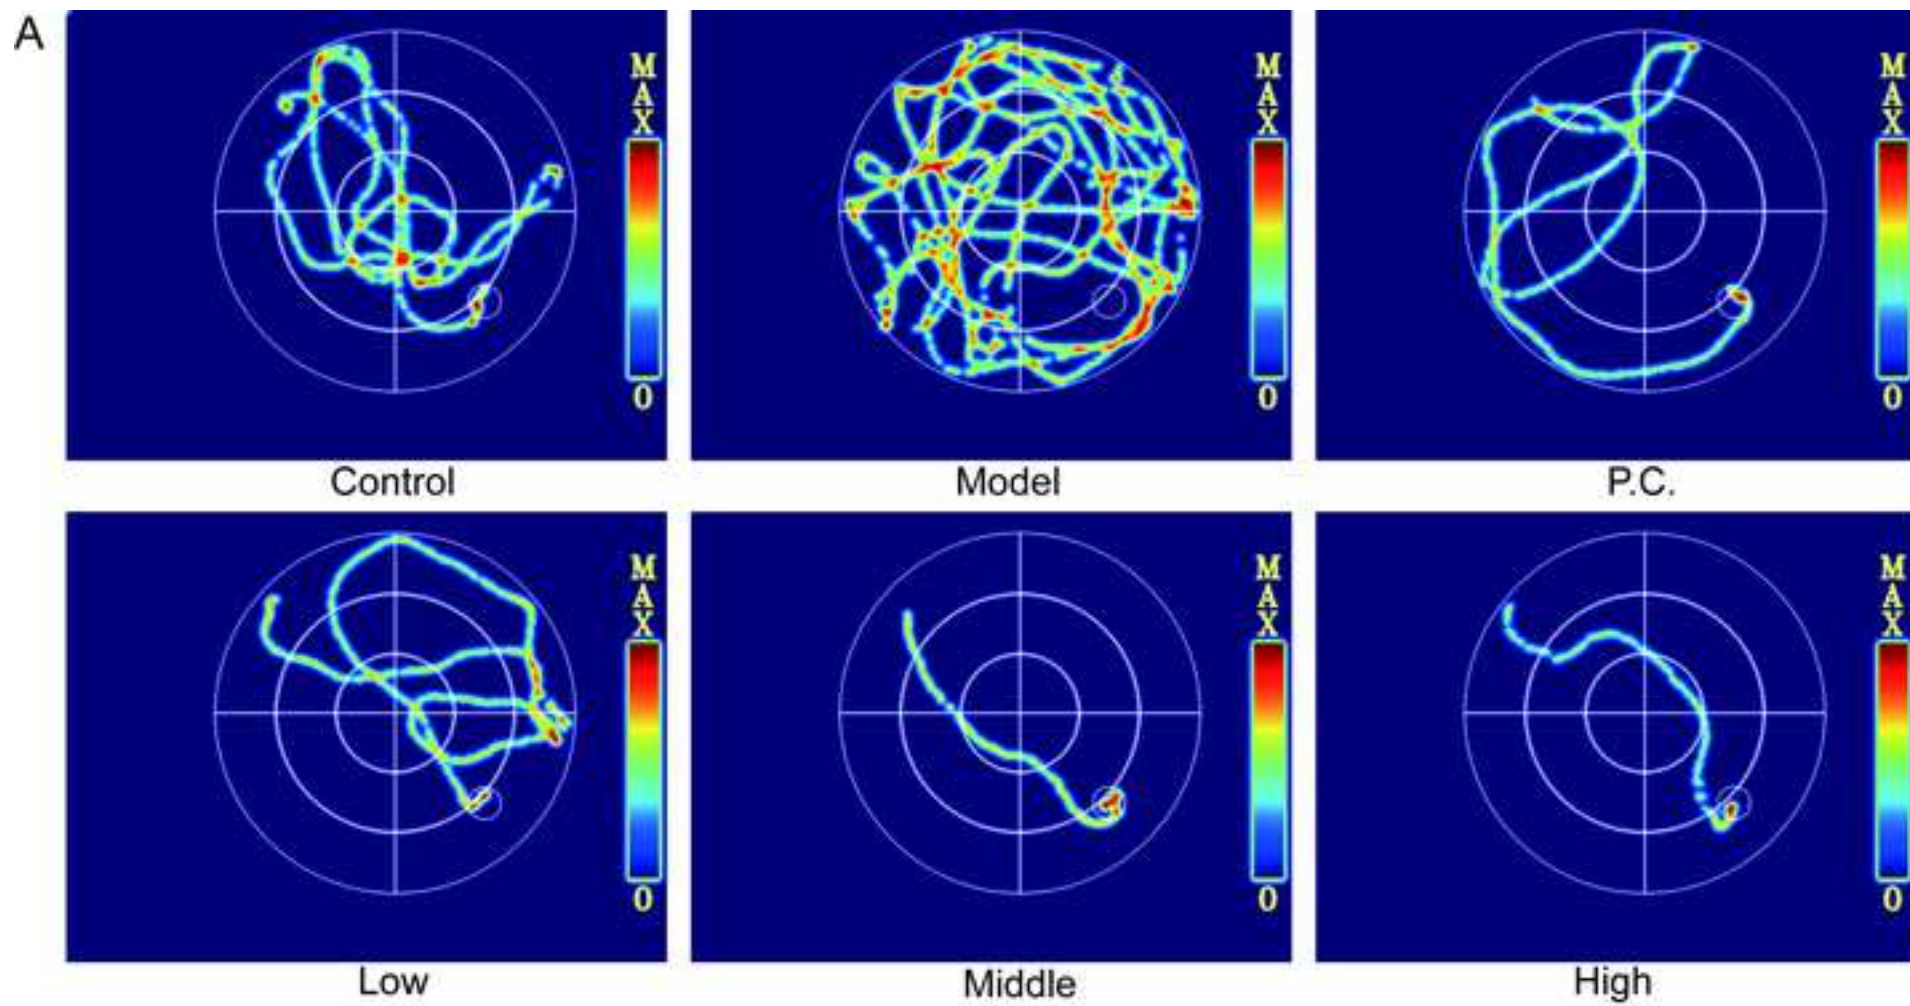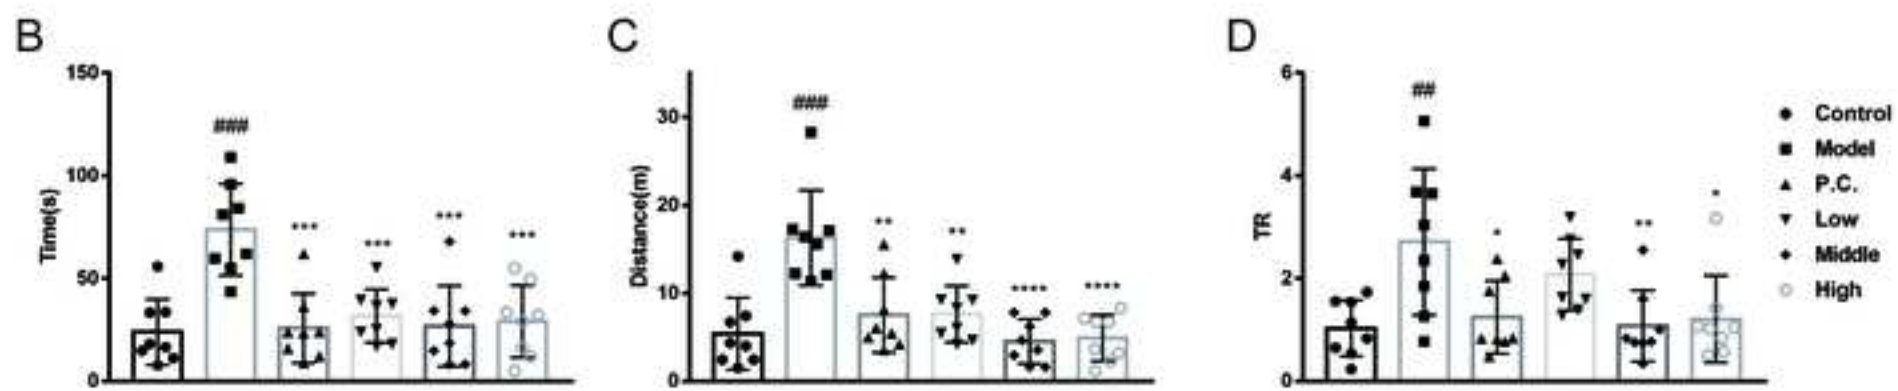

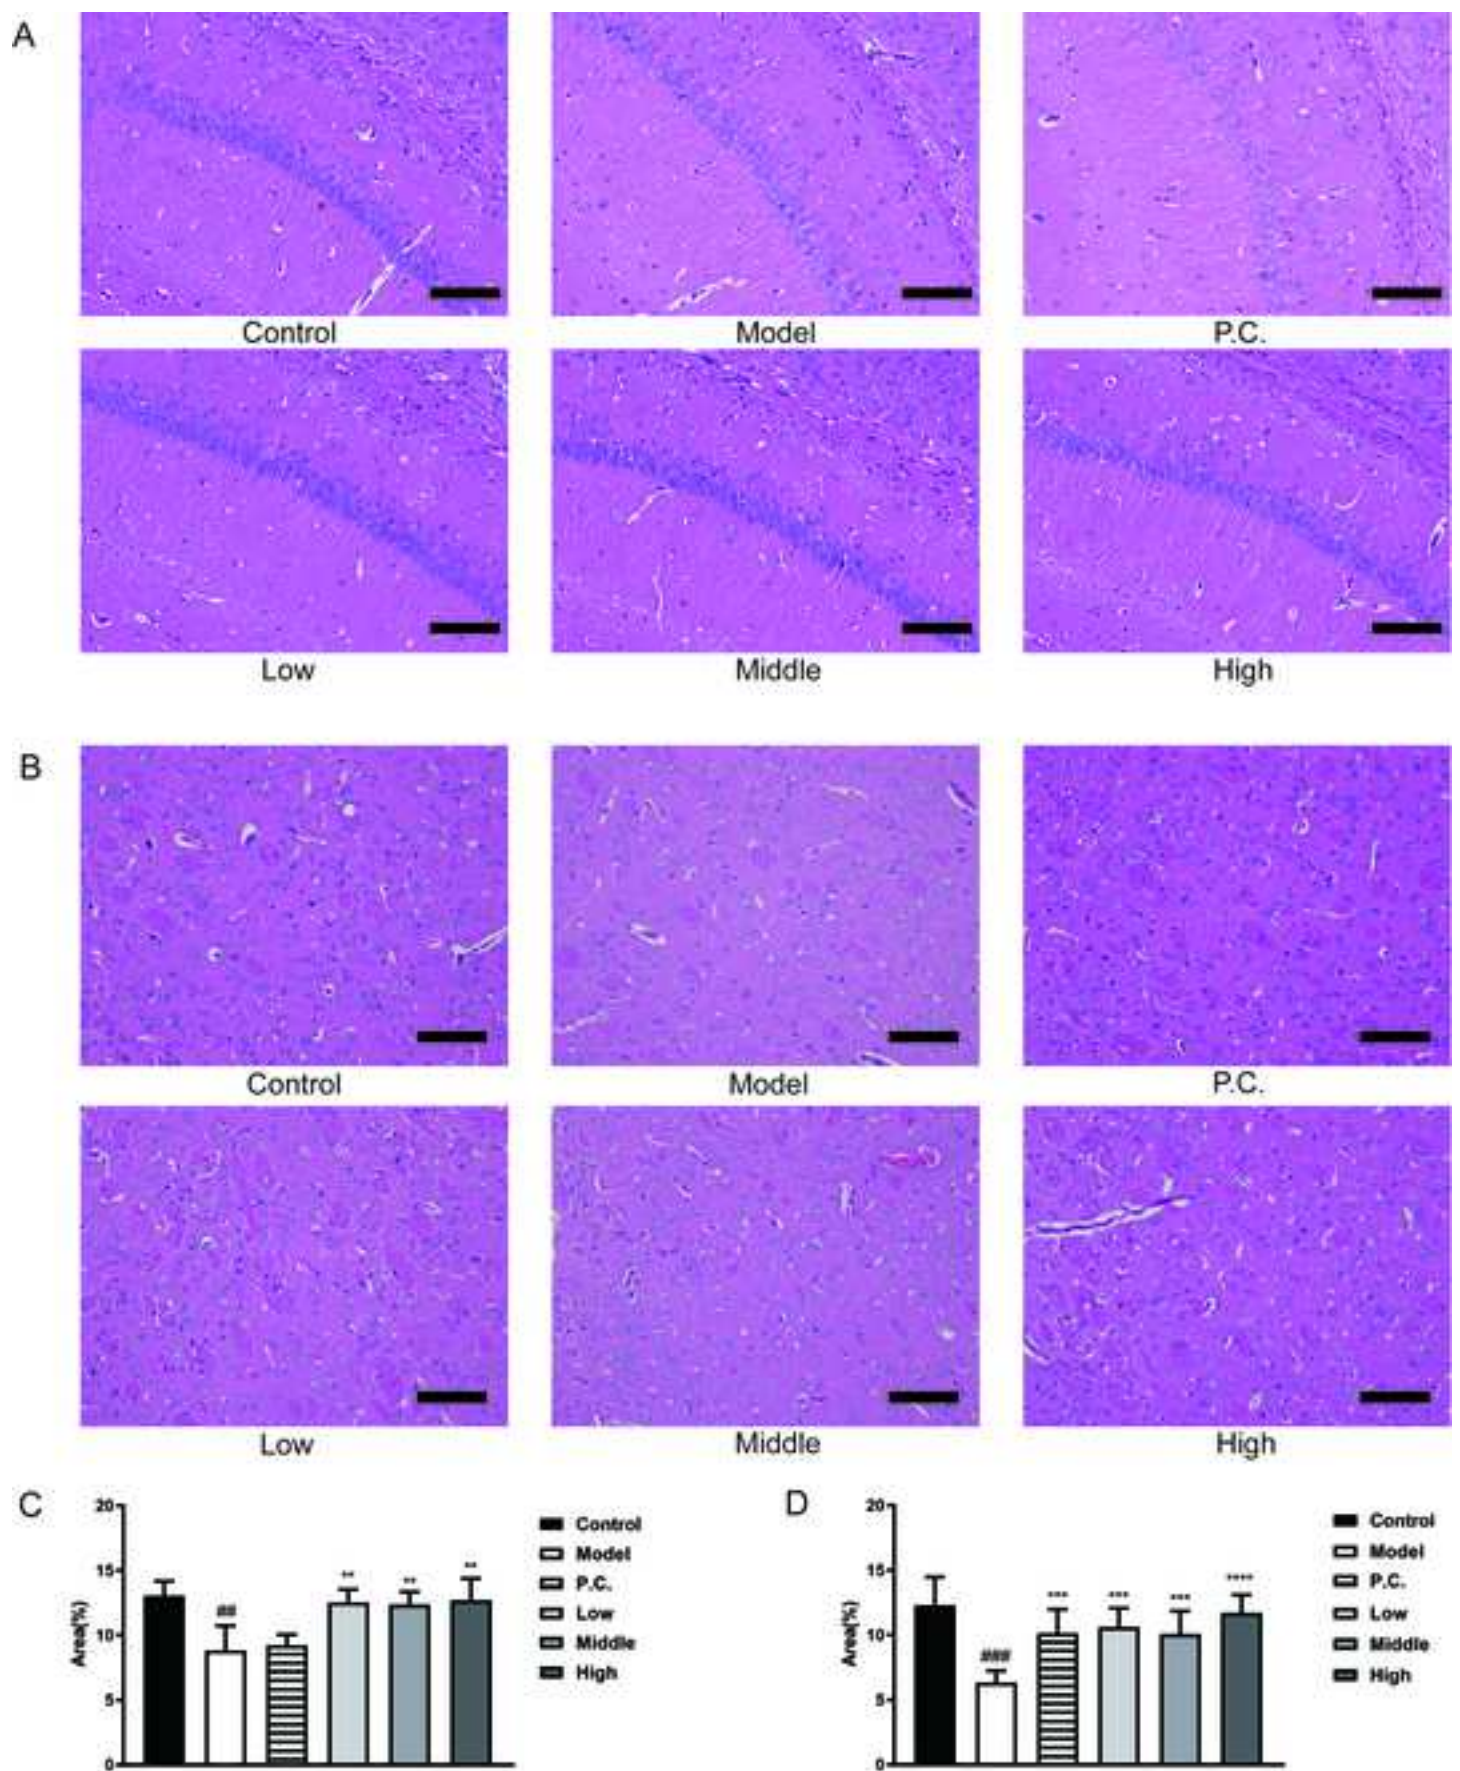

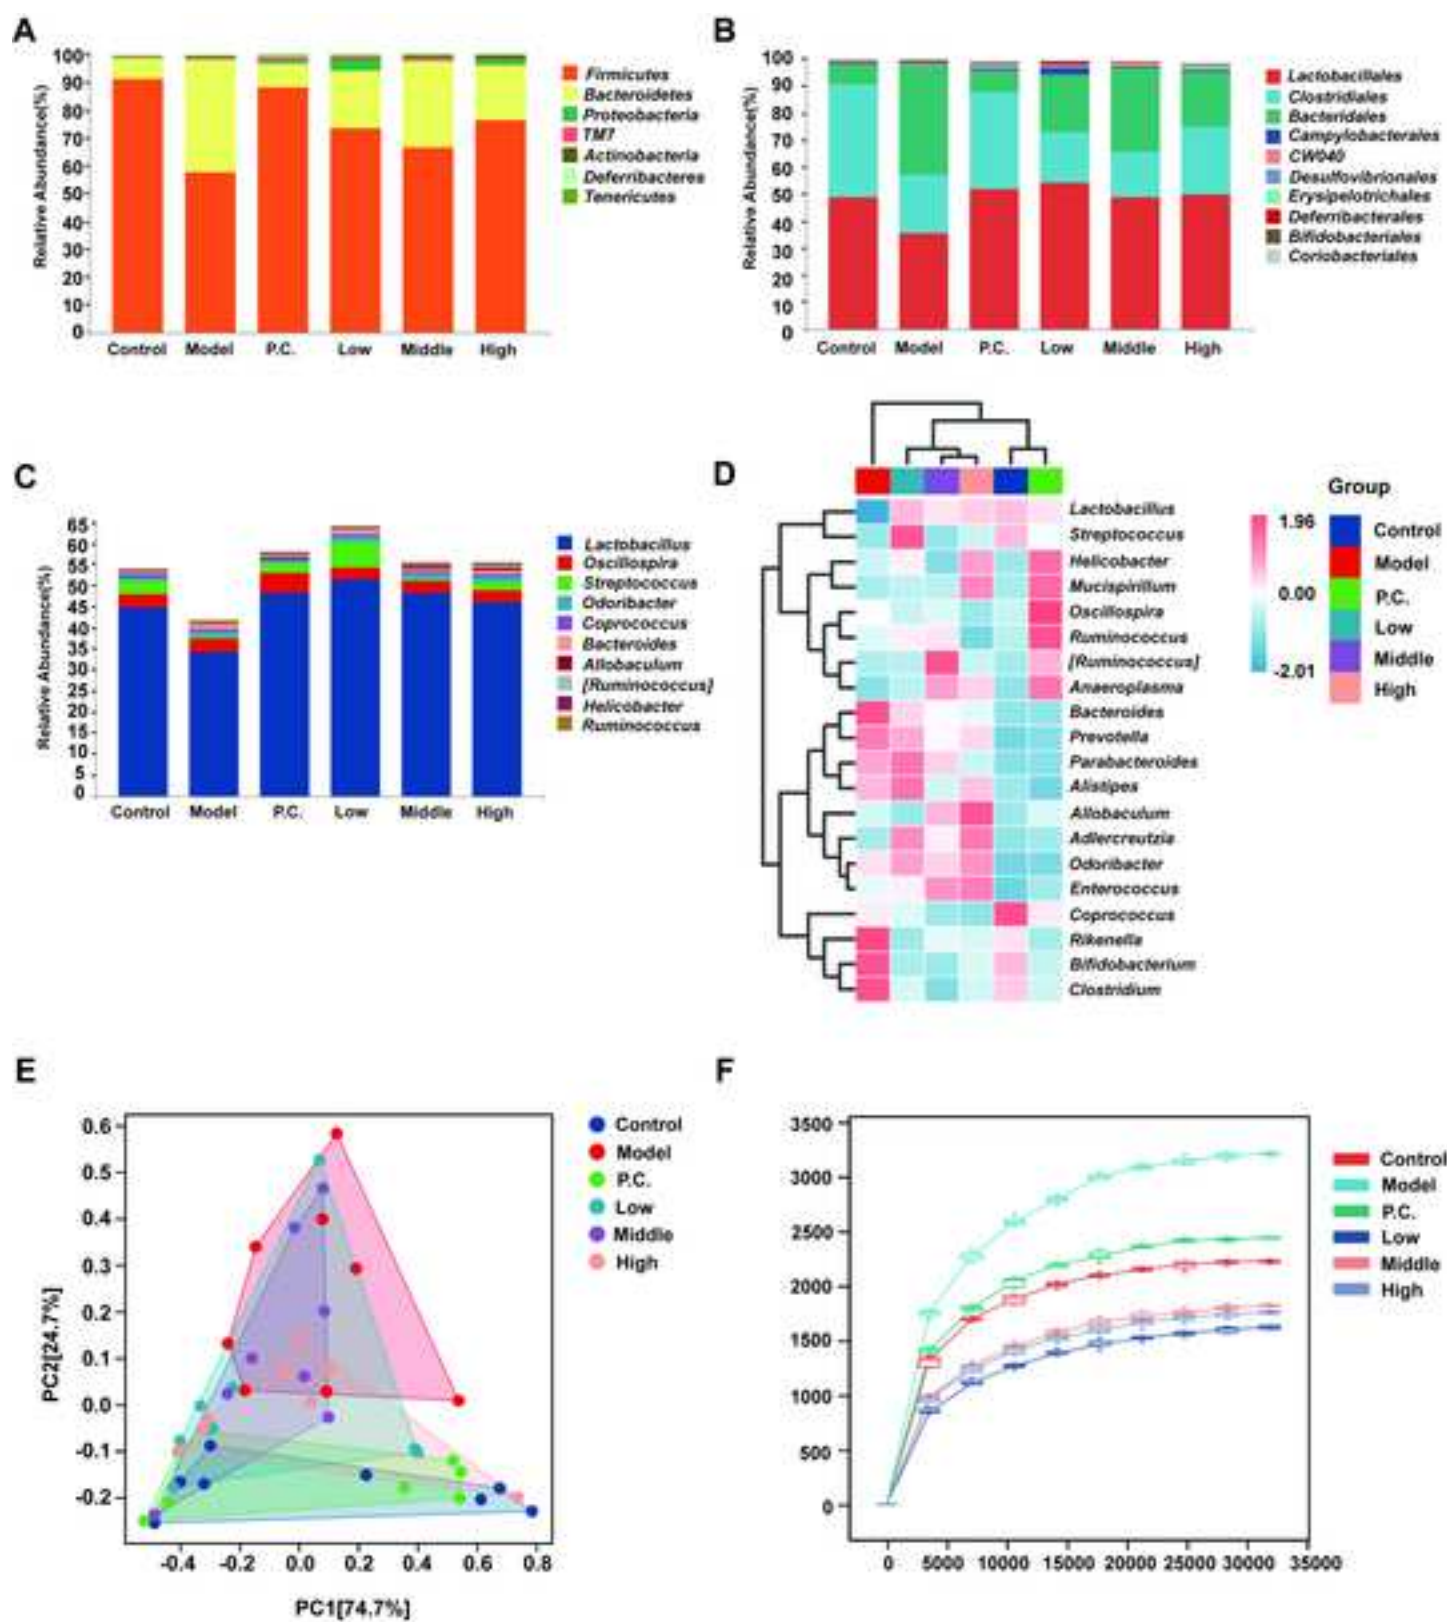

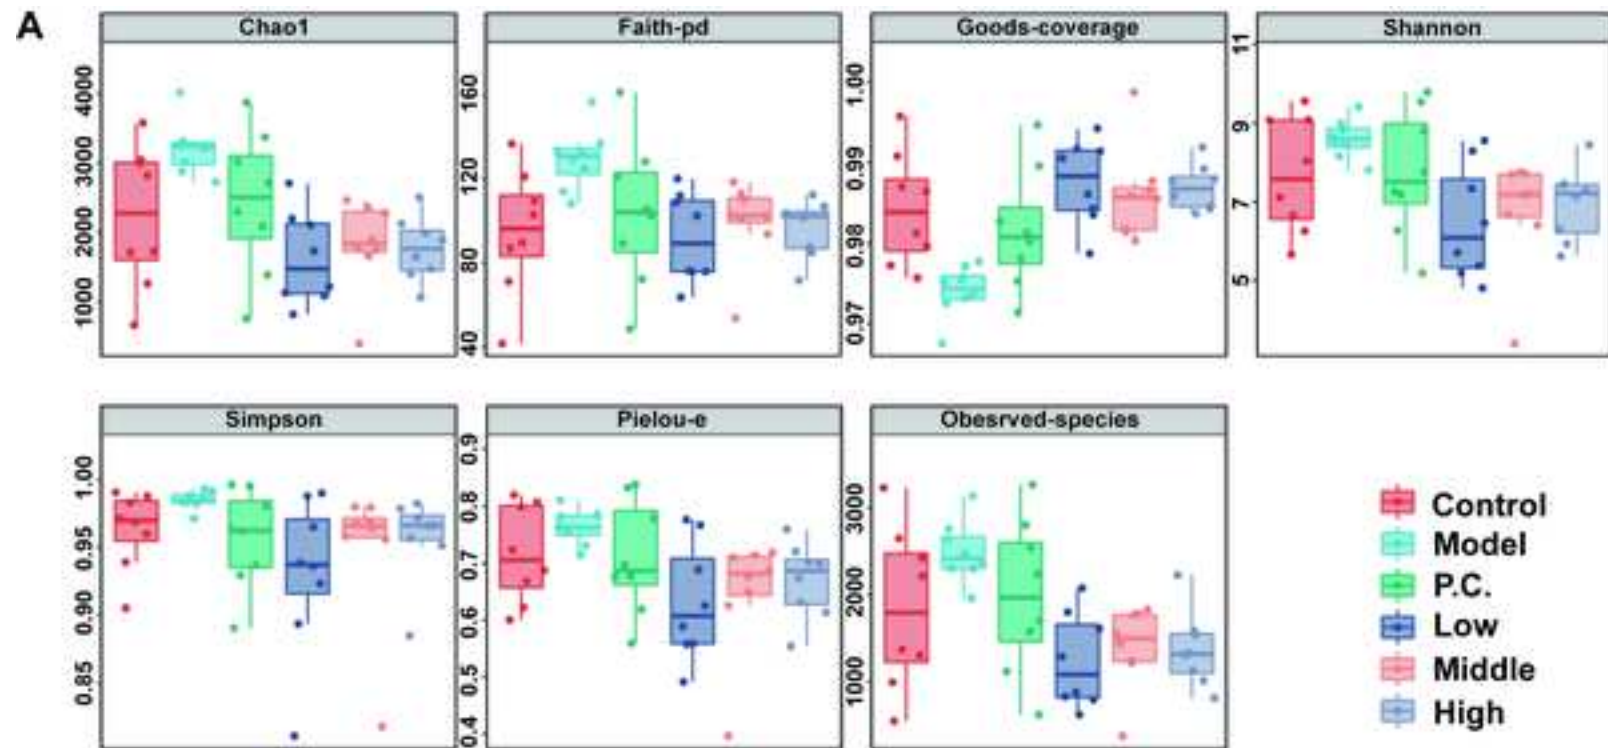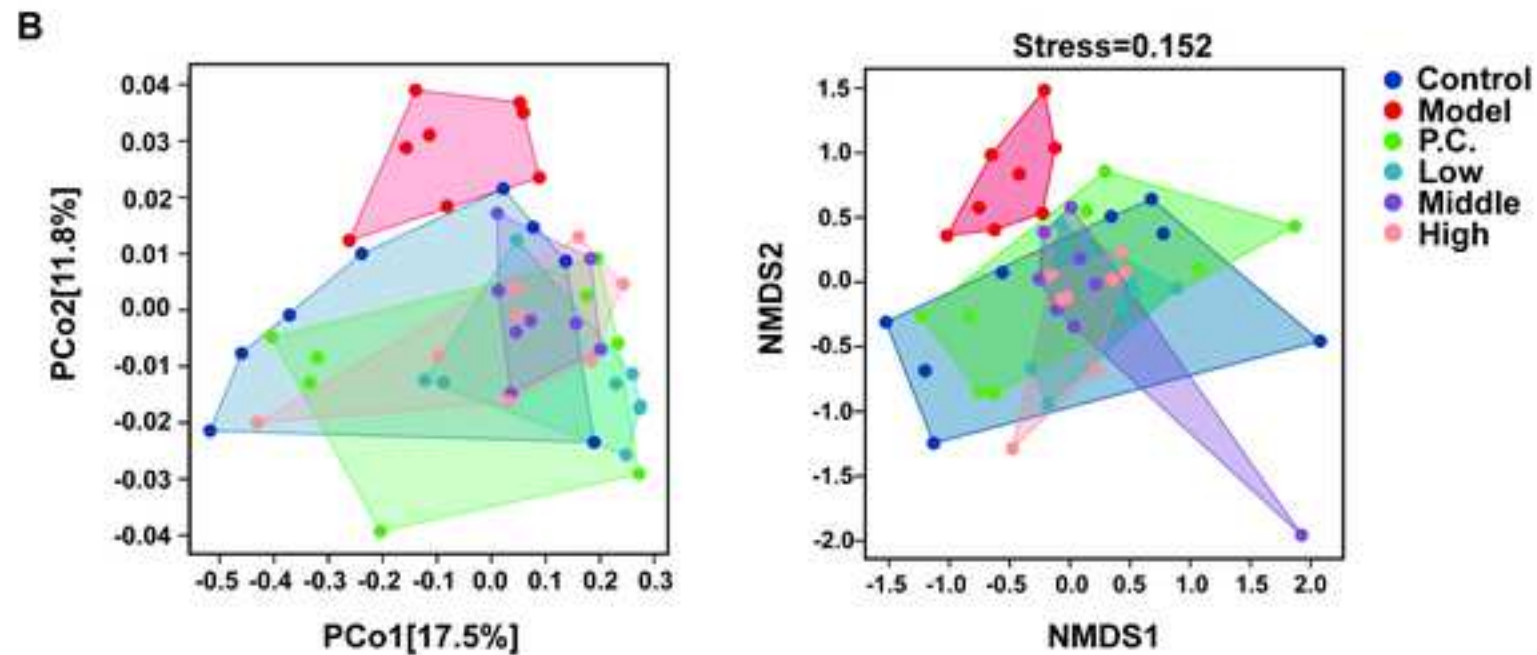

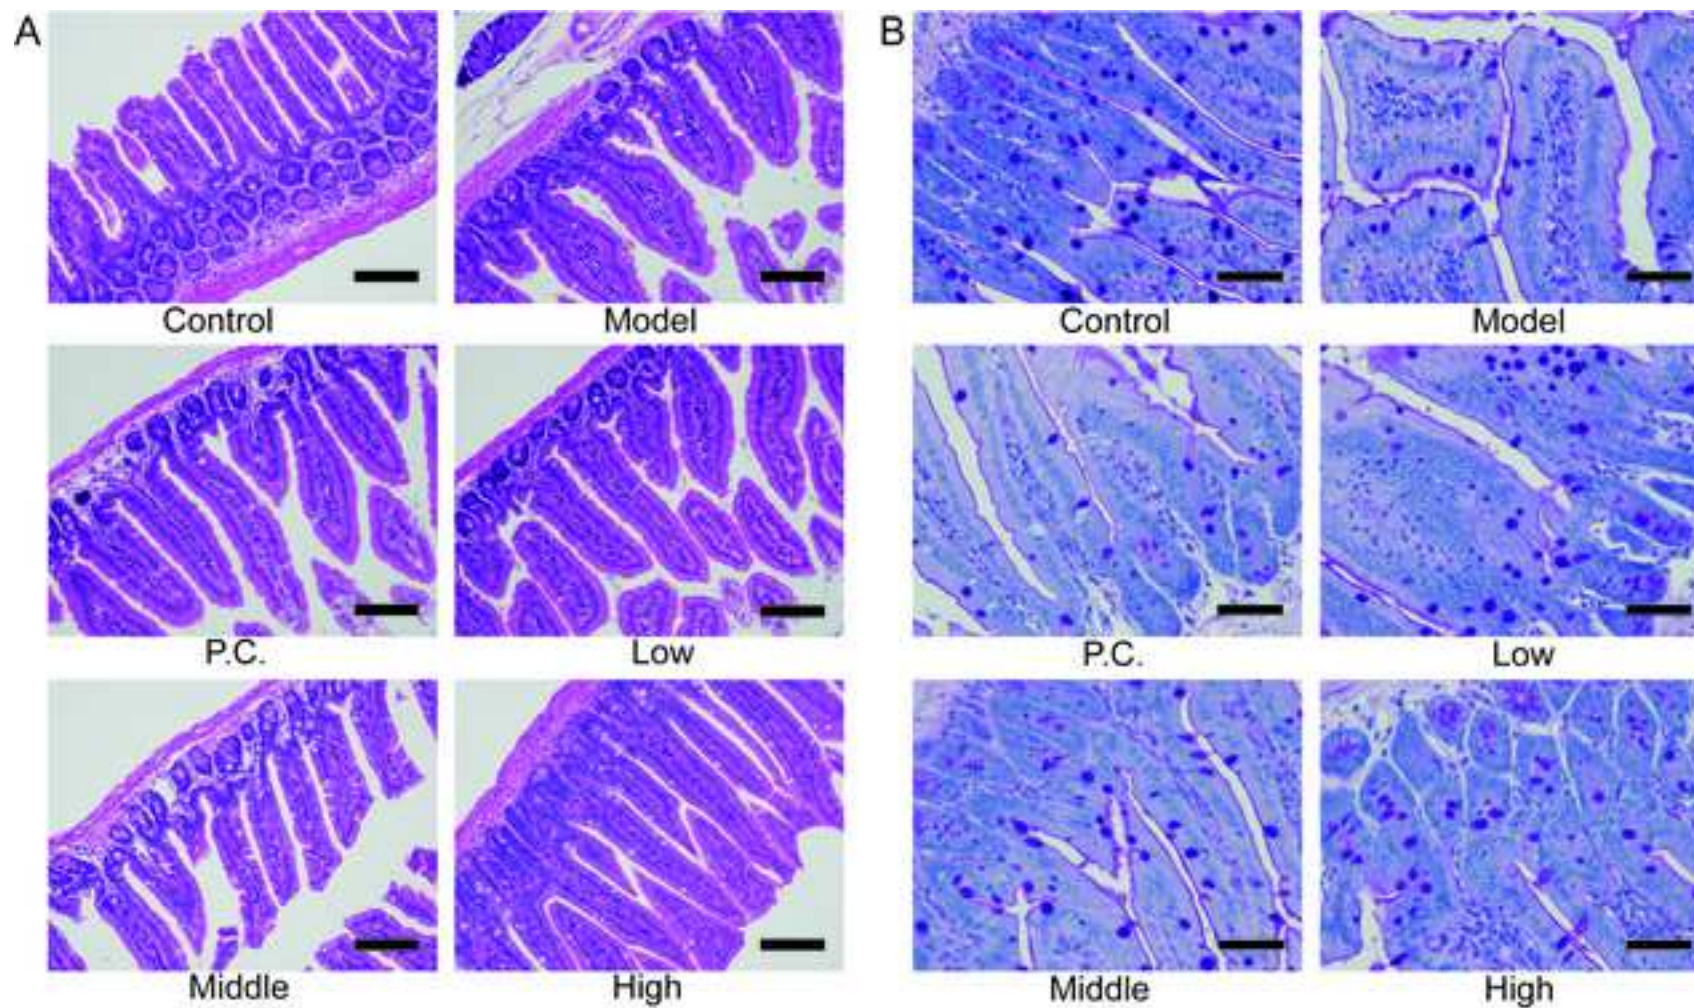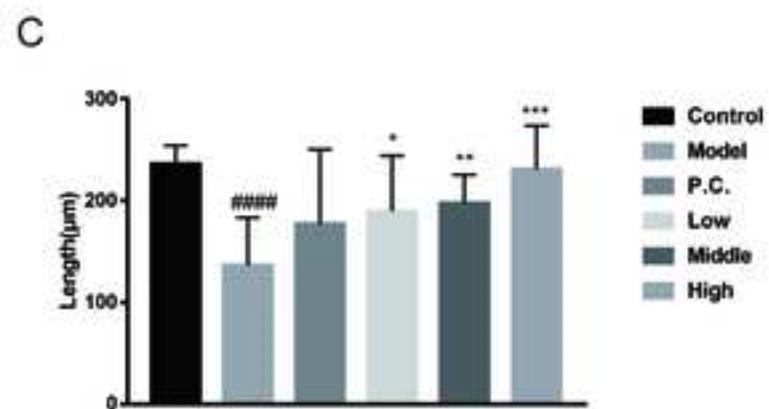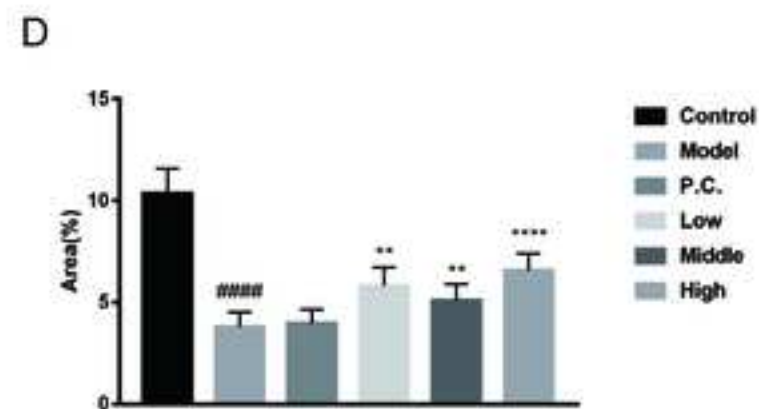

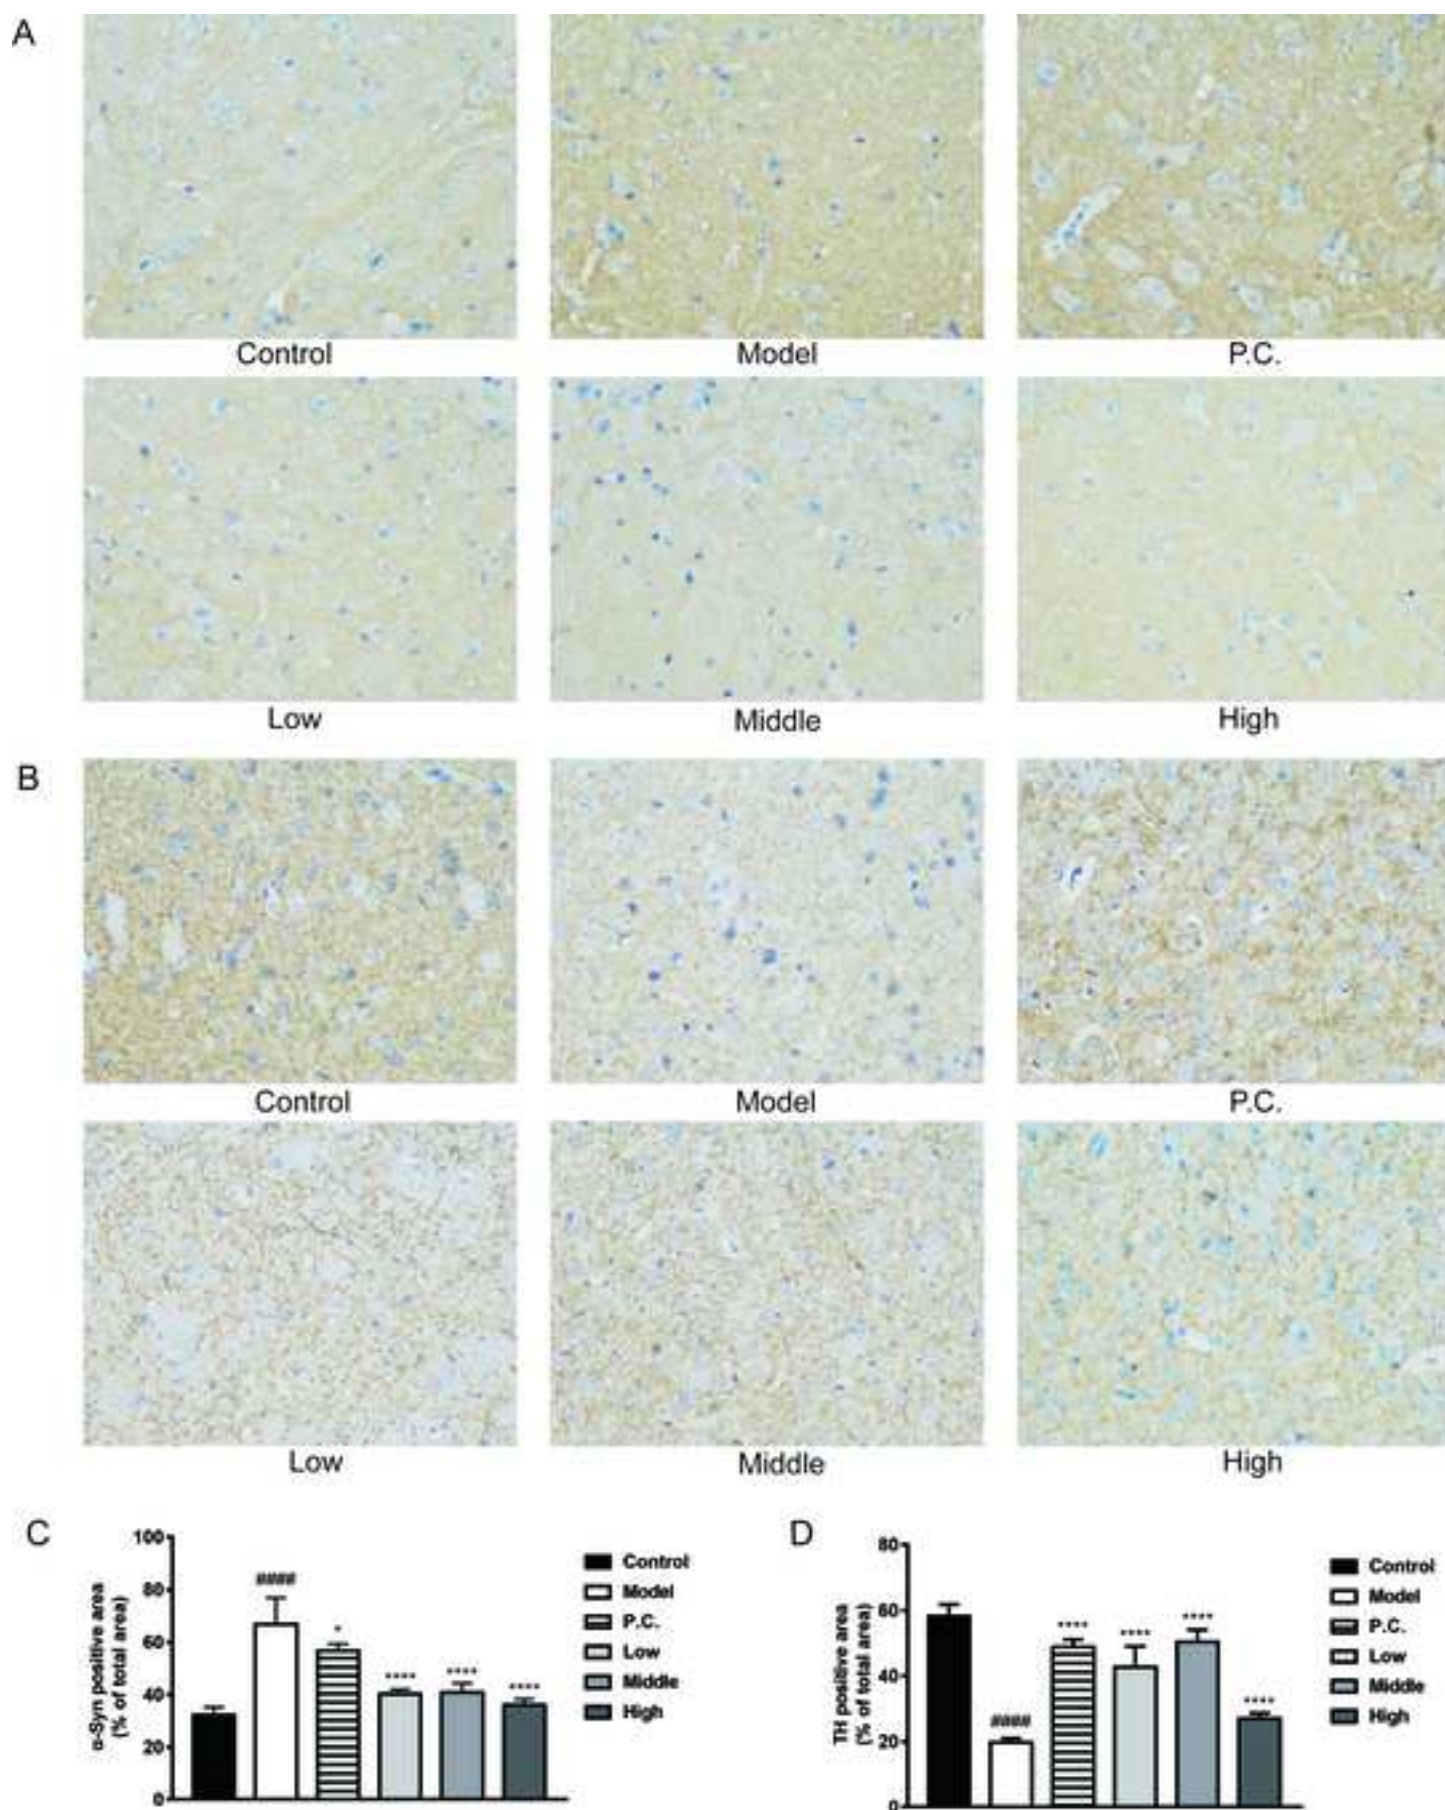

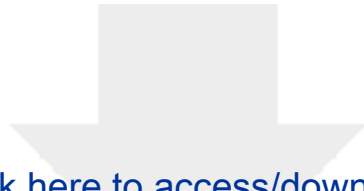

Click here to access/download  
**Supporting Information**  
Supporting Information.docx

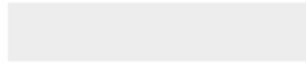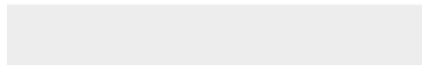

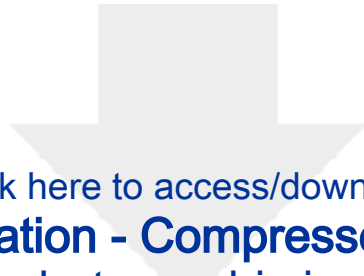

[Click here to access/download](#)

**Supporting Information - Compressed/ZIP File Archive**  
original photographic images.zip

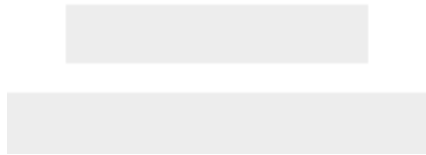



## Water extract of ginseng alleviates parkinsonism in MPTP-induced Parkinson's disease mice

Ning Xu<sup>1a</sup>, Shuyang Xing<sup>1a</sup>, Jie Li<sup>a</sup>, Bo Pang<sup>b</sup>, Meichen Liu<sup>a</sup>, Meiling Fan<sup>c\*</sup>, Yu Zhao<sup>a\*</sup>

<sup>a</sup>Jilin Ginseng Academy, Changchun University of Chinese Medicine, Changchun 130117, PR China

<sup>b</sup>College of Pharmacy, Jining Medical University, Rizhao 276826, PR China

<sup>c</sup>The Affiliated Hospital of Changchun University of Chinese Medicine, Changchun 130021, PR China

**Abstract:** In this study, we investigated the neuroprotective effect of a water extract of ginseng (WEG) obtained via low-temperature extraction of the brain of mice with Parkinson's disease (PD) and the ameliorative effect on the damaged intestinal system for the treatment of dyskinesia in PD mice. MPTP (1-methyl-4-phenyl-1,2,3,6-tetrahydropyridine) was injected intraperitoneally into male C57BL/6 mice to establish a PD model, and WEG was given via **gavage**. The results indicated that WEG could protect the damaged neuronal cells of the mice brain, inhibit the aggregation of  $\alpha$ -synuclein ( $\alpha$ -Syn) in the brain, and increase the positive expression rate of tyrosine hydroxylase (TH). WEG **significantly** improved intestinal damage and regulated intestinal disorders. WEG intervention increased the levels of beneficial bacteria, such as *Lactobacillus*, and normalized the abundance and diversity of colonies in the intestine of mice. Our results suggested that WEG protected neurons in the brain of PD mice via inhibiting the aggregation of  $\alpha$ -Syn in the brain and increasing the positive expression level of TH in the brain. WEG regulated the gut microbiota of mice, improved the behavioral disorders of PD mice, and offered some therapeutic effects on PD mice.

**Keywords:** Parkinson's disease, water extract of ginseng, neuroprotection, low-temperature extraction, gut microbiota

### 1. Introduction

Parkinson's disease (PD) is a frequent chronic neurodegenerative disease of the elderly, manifested via movement disorders such as tremors, tightening of muscles, and bradykinesia [1]. The pathological features are mainly the accumulation of  $\alpha$ -synuclein ( $\alpha$ -Syn) in the patient's brain, the loss of dopaminergic neurons in the substantia nigra region of the brain, the reduction of tyrosine hydroxylase (TH) forcing the production of Lewy bodies, and the disturbance of the gut microbiota [2–9]. **The latest research has found that PD may originate in the intestines. Since abnormal  $\alpha$ -Syn first appears in intestinal neurons before the onset of PD, intestinal dysbacteriosis is most likely related to the onset of PD disease [10]. Intestinal microorganisms act on the central nervous system through metabolites, neurotransmitters and cytokines secreted by immune cells, regulating brain-gut axis interactions [11], and the imbalance of the gut microbiota of Parkinson's patients may lead to  $\alpha$ -Syn misfolding, from the intestinal nerves to the brain and brainstem, which in turn leads to brain dopaminergic neuronal damage [12].** Treatment for PD is often based on dopamine replacement therapy, which can only improve clinical motor symptoms but cannot cure the disease completely. Levodopa,

\* Corresponding author at: Jilin Ginseng Academy, Changchun University of Chinese Medicine, No. 1035 Boshuo Road, Changchun, Jilin Province 130117, PR China.  
E-mail address: zhaoyu@ccucm.edu.cn (Y. Zhao).

<sup>1</sup> These authors contributed equally to this work.

for example, is converted to dopamine in the presence of Aromatic amino-acid decarboxylase [13]. As the disease progresses, however, the duration of levodopa's effectiveness is reduced and can also cause movement disorders. Data have suggested that some herbal extracts protect dopaminergic neurons and promote functional recovery from brain injury. Thus, herbs acting on multiple targets may have a potential role to play in the treatment of neurodegenerative diseases [14–15].

Panax ginseng, a traditional herbal medicine, has been used as a traditional medicine in Asia for more than 2000 years. It is famous for its healthcare and therapeutic effects. Phytochemical studies have found that the main components of ginseng contain many active ingredients, such as polysaccharides, ginsenosides, and proteins. [16]. Clinical studies have shown that ginseng has sedative, anti-aging, and neuroregulatory effects, as well as therapeutic benefits for neurodegenerative diseases. [17–18]. Modern research suggests that compounds in ginseng may be good drugs for treating neurodegenerative diseases, such as PD [19–21]. Jiang et al. studied the neuroprotective effect of boiling-water extract of ginseng on corticosterone-induced apoptosis in PC12 cells [22]. Van et al. found that alcoholic extracts of ginseng, such as G115, significantly reduced dopaminergic cell loss, microglia division, and the accumulation of  $\alpha$ -synuclein aggregates when administered orally [23]. Scholars have found that different ginseng chemical components have similar neuroprotective effects. Wang et al. conducted behavioral tests on mice and demonstrated that ginseng polysaccharides had antidepressant effects [24]. Ginseng polysaccharides also has been demonstrated to have antidepressant effects and may be closely related to neurotransmitters [25–26]. Ginseng polysaccharides improved motor impairment in PD mice, as well as improved oxidative stress levels in mice, reduced the expression of apoptotic proteins in brain tissue of PD mice, and reduced parkinsonian symptoms [27]. Different types of ginsenosides exhibited neuroprotective effects in both in vivo and in vitro tests [28–29]. Chen et al. found that ginsenoside Rb<sub>1</sub> restored neural loss by reducing oxidative stress and neuroinflammation, restoring cholinergic neuronal function, and rescuing cisplatin-induced memory impairment, suggesting that ginsenoside Rb<sub>1</sub> exerts neuroprotective effects [30]. At the same time, ginsenosides also have a potential therapeutic effect on intestinal microbiota dysbiosis. Ginsenoside Rb<sub>1</sub> significantly changed the composition of gut microbiota in hyperglycemic mice and increased the abundance of mucin-degrading bacteria *Akkermansia spp.* [31]. Ginsenoside Rk<sub>3</sub> intake caused significant changes in the intestinal flora of mice, enriching *Bacteroides*, *Alloprevotella* and *Blautia*, significantly reducing the *Firmicutes/Bacteroidetes* ratio, effectively improving intestinal dysbacteriosis and reducing the inflammatory response of mice [32]. Ginseng protein exerted neuroprotective effects on D-galactose/AICl<sub>3</sub>-induced hippocampus in rats [33]. Liu et al. demonstrated that ginseng protein prevented mitochondrial dysfunction and neurodegeneration in PD by ginseng protein giving *Drosophila melanogaster* PINK1 model of PD [34]. Numerous experiments have been conducted to demonstrate the neuroprotective effects of the three components—that is, ginseng polysaccharides, ginsenosides, and proteins. Whether the synergistic administration of these three components still had a neuroprotective effect and whether the WEG had an improvement on PD in vivo, however, have not been

reported.

We know that ginseng extracts obtained using traditional extraction methods under high-temperature environments or with organic solvents. During high-temperature extraction or in organic solvents, proteins in ginseng are decomposed and ginsenosides are partially converted under high-temperature conditions [35–36]. In this study, we investigated the improvement of parkinsonism in mice using WEG obtained using low-temperature extraction. We used a 1-methyl-4-phenyl-1,2,3,6-tetrahydropyridine (MPTP) induced PD mice model to evaluate the therapeutic effect of WEG on PD mice according to behavioral indicators. For statistical analysis of MPTP-induced changes in  $\alpha$ -Syn and TH in mice brain, we observed the improvement of parkinsonism in mice brain by oral administration of WEG. By analyzing the sequence of gut microbiota of mice fecal samples, we addressed the changes in the gut microbiota in mice with PD. To evaluate the use of ginseng to treat PD, we studied the effect of WEG on the composition and diversity of microbial gut flora in PD mice.

## 2. Materials and Methods

### 2.1. Animals and feeding

We used specific pathogen-free (SPF) male C57BL/6 mice (lot number) weighing  $21 \pm 1$  g in this study. The animals were raised separately in a clean and dry laboratory with the following environmental conditions: temperature  $25 \pm 2^\circ\text{C}$ , humidity  $50\% \pm 5\%$ , alternating light and dark for 12 h/12 h, and free diet. All mice were purchased from YiSi Laboratory Animal Technology Co., Ltd. (Jilin Province, China). All of the animal experiments complied with the requirements of international experimental animal ethics, and were approved by the Animal Ethics Committee of Changchun University of Chinese Medicine.

### 2.2 Establishing PD mice, grouping, and drug administration

The procedure to build the chronic PD mice model. was as follows: After 1 week of adaptive feeding, the mice were randomly divided into six groups (eight mice in each group), including control, model, positive control (P.C.), low, middle, and high groups. We injected MPTP intraperitoneally every three days from days 0 to 14 (dose: 0.6 mg/mouse, blank group was injected intraperitoneally with equal volume of normal saline), and intraperitoneally every two days from days 14 to 28. Oral administration was given on days 28 to 56. According to the records in Pharmacopoeia of the People's Republic of China 2020, the daily oral dose of ginseng for human should be 3–9 g, and the corresponding administration groups of mice were categorized into low (0.013g/kg body weight per day), middle (0.026g/kg body weight per day), and high groups (0.039g/kg body weight per day).

### 2.3. Preparation of WEG

The ginseng used in this study was purchased from Wanliang Ginseng Market (Jilin Province, China). Carbidopa and Levodopa Sustained Release Tablets (Carbidopa50 mg and Levodopa 200 mg/tablet) were purchased from MSD (Hangzhou MSD Pharmaceutical Co., LTD., Hangzhou, China). To prepare the WEG, we crushed the ginseng herbs to form a powder, which was sieved and then placed in a conical flask with a stopper. Ginseng was extracted with neutral aqueous solution (pH  $7.0 \pm 0.1$ ; ratio of ginseng powder to solvent 1:10) for three times for 12 h at  $4^\circ\text{C}$ . Using centrifugal

supernatant fluid filtration, we obtained the samples after vacuum freeze drying. To maximize the retention of active components, such as protein and amino acid in ginseng, the temperature of the whole extraction process was kept below 30°C (the calculated extraction rate was 30%±3%).

#### 2.4 Identification of main components in WEG

We determined the three main chemical components of the WEG. The total protein content of the samples was determined using a Bradford Protein Concentration Kit (Solarbio Science & Technology Co Ltd., Beijing, China), and the result was expressed as a percentage of total protein in the ginseng powder. The total polysaccharide content was determined using the phenol–sulfuric acid solution method, and the result was expressed as the percentage of total polysaccharide in ginseng powder. The ginsenoside content in the samples was determined using high–performance liquid chromatography (HPLC).

##### 2.4.1 HPLC analysis conditions

HPLC analysis was performed using Agilent LC–1220 HPLC (Agilent Technologies Co Ltd., Santa Clara, CA, USA), equipped with a binary solvent delivery pump, an automatic sampler, and an ultraviolet (UV) detector (Agilent Technologies Co Ltd.). The separation was performed on an Agilent SB–AQ C18 column (250 mm×4.6 mm, 5 μm). The flow rate was 1.0 mL/min. The detection wavelength was set to 203 nm. The column temperature was set at 35°C, and the injection volume was 10 μL. The mobile phase consisted of acetonitrile (A) and 0.1% phosphoric acid aqueous solution (B). The gradient program was as follows: 0–40 min, 19% A. 40–42 min, 19–22% A. 42–46 min, 26–32% A. 46–71 min, 32–38% A. 71–78 min, 38–49% A. 78–83 min, 49–51% A. All solutions were filtered using a 0.22–μm membrane filter before being added to the machine.

#### 2.5. Behavioral tests

##### 2.5.1. Pole test

The pole climbing test is a classical method used to evaluate the motor coordination ability of mice. The climbing rod is an antiskid rod with a length of 50 cm and a diameter of 1 cm that is erected on a plane. The mice climbed from the top to the bottom of the rod, and the time spent climbing was recorded to compare their motor ability.

##### 2.5.2. Rotor test

A rotor test was used to investigate the reaction and motor ability of mice. A rotating shaft was rotated at 8 g and mice were placed on the opposite side of the rotating rod and moved upward. Mice who stayed on the rotating rod, maintained their balance, and did not fall to the ground, maintained limb muscle coordination. Mice with motor problems or poor coordination fell more quickly. We recorded the amount of time the mice lasted on the rotating rod.

##### 2.5.3. Traction test

A traction test is a method used to evaluate the motor ability of the mice. We took an 80 cm length of string with a diameter of 0.5 cm and fixed the ends of the string at the same height. The mice were placed upside down on the rope, and we recorded the hanging time.

##### 2.5.4. Morris water maze test

The water maze test is a sensitive test used to evaluate the learning and memory ability of experimental animals to sense their position in space. The Morris water maze test used in this study was conducted in a circular pool (120 cm in diameter, 50 cm high wall). The pool was filled with water and the temperature was maintained at  $24\pm 1^{\circ}\text{C}$ . We divided the pool equally into four areas. A circular fixed platform (10 cm in diameter) was submerged 1 cm below the surface of the water. On days 1 to 4 of training, the platform was moved to the same position (15 cm from the pool wall) and the mice were gently lowered from the edge of the pool wall at the four area edges (facing the pool wall). The starting position was in the water in the area opposite the platform. The experiment was automatically terminated when the mice climbed onto the platform for the first time and stood still for more than 3 s. If the mouse did not reach the platform within 120 s, the mouse was gently guided to the platform position. The fixed-position search test was conducted on day 5. We added titanium dioxide to the pool to make the water appear white and opaque. We placed the platform in a fixed position 15 cm from the edge of the pool (submerged 1 cm below the surface of the water so that the mice could not see the platform due to the opacity of the water). We recorded the time when the mice found the platform and the actual swimming distance, as well as the swimming time of the mice in the inner and outer circles. The cruise experiment was conducted on day 6. We recorded the swimming time, stationary time, and swimming distance of the mice in 120 s. All data were obtained using a video tracking system (Taimeng Technology Co Ltd., Chengdu, China).

## 2.6. Tissue collection

After completing the behavior test, the mice were euthanized after being anesthetized with carbon dioxide. The head and body were separated, and the rectum with fecal contents was immediately dissected and taken from all mice and placed in cryopreservation tubes. The samples were quickly placed in liquid nitrogen and stored at ultralow temperatures for the detection of gut microbiota. The mouse brain was quickly removed on a cold wooden board and immediately immobilized in 4% paraformaldehyde for 48 h for immunohistochemistry (IHC) and hematoxylin and eosin (H&E). Small intestine was taken from mice at the same location and immediately fixed in 4% paraformaldehyde for 48 h for H&E.

## 2.7. Western blot analysis

The mice brains were lysed using RIPA lysis buffer (Solarbio Science & Technology Co. Ltd., Beijing, China) and the supernatant was collected using  $10^4\text{g}$  centrifugation at  $4^{\circ}\text{C}$  for 10 min. We determined protein concentration using the Bradford Protein Concentration Kit by adding the appropriate amount of loading buffer and then boiling the sample to denature it. Protein samples (30  $\mu\text{g}$  per lane) were separated using gel electrophoresis and transferred to polyvinylidene fluoride (PVDF) films (Millipore, Bedford, MA, USA). After the transfer, the transferred PVDF films were placed in an antibody incubation kit and closed at  $25^{\circ}\text{C}$  for 2 h on a shaker with an appropriate amount of 5% skimmed milk powder, after closure the films were washed three times with Tris-buffered saline with polysorbate 20 (TBST) for 5 min each. PBST was discarded and the films were incubated overnight on a shaker at  $4^{\circ}\text{C}$  with primary antibodies against  $\alpha\text{-Syn}$  (1:1000), TH (1:6000), glyceraldehyde 3-phosphate

dehydrogenase (GAPDH) (1:1000), and  $\beta$ -tubulin (1:2000) (all antibodies were purchased from Abcam Biotechnology Co Ltd., Cambridge, UK). This process was followed by incubation with horseradish peroxidase-conjugated antibody for 1 h. We used  $\beta$ -tubulin and GAPDH as a loading control.

## 2.8. Intestinal microbiome analysis

We conducted gut microbe 16S rRNA sequencing and data analysis. According to the manufacturer's protocol, the total DNA used was fecal DNA Isolation Kit (MP Biomedicals, Santa Ana, CA, USA). The amplified polymerase chain reaction (PCR) products were sequenced on Illumina MiSeq, and the high-quality sequences with 97% homology similarity were classified by operational taxon (OTU). The sequencing primer was F:ACTCCTACGGGAGGCAGCA R:GGACTACHVGGGTWTCTAAT and the sequencing region was 16S-V3V4. We used QIIME2 (Quantitative Insights Into Microbial Ecology, V2.0, <https://docs.QIIME2.org/>) and R package 3.5.1 (<https://www.r-project.org/>) for the 16S rRNA gene sequencing analysis. We analyzed alpha diversity by Chao1 and Shannon indices. Beta diversity was studied using principal coordinate analysis (PCoA) and a weighted UniFrac phylogenetic distance matrix. We determined bacterial community structure using relative abundance at the phylum level and compared the differences between groups at the genus level using the heat map method.

## 2.9. Statistical analysis

We plotted all data by GraphPad Prism7.0 software and analyzed the data using SPSS22.0 statistical software. Data were expressed as mean $\pm$ SD. We used one-way analysis of variance (ANOVA) to compare the mean across multiple groups, and Tukey's test for the postcomparison of multiple groups.  $P < 0.05$  was regarded as the threshold of significance.

## 3. Results

### 3.1. Main compound mass in WEG

The calculated extraction rate of WEG was 34.23 $\pm$ 3.50%. The protein content of WEG was 21.51%, accounting for 7.36% of ginseng:

$$Y = 0.6136X + 0.5851, \quad (1)$$

where range = 0–1.5 mg·mL<sup>-1</sup>, and R = 0.9967.

Ginseng polysaccharides in WEG was 68.40%, accounting for 23.41% of ginseng:

$$Y = 0.6327X + 0.1083, \quad (2)$$

where range = 0–0.6 mg·mL<sup>-1</sup>, and R = 0.9998.

WEG was quantified for the analysis of ginsenosides by HPLC. HPLC profiles are shown in Fig. 1. Each ginsenoside contained the following: Ro 0.13%, Rg<sub>1</sub> 0.66%, Re 2.39%, Rf 0.27%, Rg<sub>2</sub> 0.09%, Rh<sub>1</sub> 0.03%, Rb<sub>1</sub> 4.93%, Rc 1.05%, Rb<sub>2</sub> 0.21%, Rb<sub>3</sub> 0.25%, Rd 1.15%, and Rg<sub>3</sub> 0.11%. With a total content of 11.27% for all ginsenosides, accounting for 3.86% of the ginseng. All standard substances were purchased from Yuanye Bio-Technology for (Yuanye Bio-Technology Co Ltd., Shanghai, China).

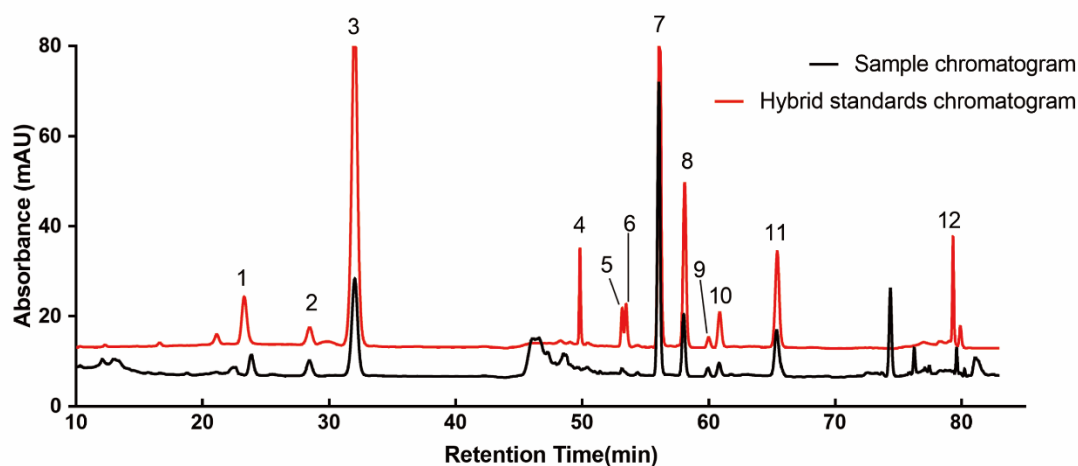

**Fig. 1.** HPLC chromatogram of ginsenosides (1: Ro. 2: Rg<sub>1</sub>. 3: Re. 4: Rf. 5: Rg<sub>2</sub>. 6: Rh<sub>1</sub>. 7: Rb<sub>1</sub>. 8: Rc. 9: Rb<sub>2</sub>. 10: Rb<sub>3</sub>. 11: Rd. 12: Rg<sub>3</sub>)

### 3.1.1. Validation of analytical methods

We evaluated the proposed method according to the working curves and analytical performance, including linearity, precision, accuracy, and stability:

- Linearity: The working curves were plotted from the peak area values against the concentrations of the 12 ginsenosides in the spiked samples (Table 1).

**Table 1**

Regression equation for 12 compounds.

| Anlytes         | Regression Equation | Correlation Coefficient(R) | Range( $\mu$ g) |
|-----------------|---------------------|----------------------------|-----------------|
| Ro              | $Y=593434X-3.6976$  | 0.9995                     | 0.16-0.97       |
| Rg <sub>1</sub> | $Y=133991X+21.999$  | 0.9989                     | 0.23-1.35       |
| Re              | $Y=235757X+162.72$  | 0.9988                     | 3.33-19.98      |
| Rf              | $Y=339669X-48.157$  | 0.9975                     | 0.25-1.52       |
| Rg <sub>2</sub> | $Y=377672X-2.3765$  | 0.9997                     | 0.09-0.52       |
| Rh <sub>1</sub> | $Y=521556X-2.3441$  | 0.9994                     | 0.08-0.47       |
| Rb <sub>1</sub> | $Y=194604X+28.418$  | 0.9999                     | 1.98-11.88      |
| Rc              | $Y=219980X+5.8826$  | 0.9997                     | 0.86-5.13       |
| Rb <sub>2</sub> | $Y=171807X-0.375$   | 0.9999                     | 0.07-0.44       |
| Rb <sub>3</sub> | $Y=214806X+6.6436$  | 0.9998                     | 0.21-1.28       |
| Rd              | $Y=249009X-7.1487$  | 0.9998                     | 0.60-3.60       |
| Rg <sub>3</sub> | $Y=529942X-7.9875$  | 1.0000                     | 0.16-0.96       |

- Precision: The RSDs of the peak areas of the 12 analytes showed that Ro 0.62%, Rg<sub>1</sub> 0.94%, Re 0.21%, Rf 0.89%, Rg<sub>2</sub> 1.28%, Rh<sub>1</sub> 1.54%, Rb<sub>1</sub> 0.78%, Rc 2.33%, Rb<sub>2</sub> 1.05%, Rb<sub>3</sub> 0.60%, Rd 1.33%, and Rg<sub>3</sub> 1.38% were all less than 3%.

- Accuracy: The RSDs of the peak areas of the 12 analytes showed that Ro 0.91%, Rg<sub>1</sub> 0.68%, Re 1.21%, Rf 0.47%, Rg<sub>2</sub> 1.36%, Rh<sub>1</sub> 1.76%, Rb<sub>1</sub> 1.73%, Rc 2.06%, Rb<sub>2</sub> 1.64%, Rb<sub>3</sub> 1.38%, Rd 2.13%, and Rg<sub>3</sub> 1.56% were all less than 3%.

- Stability (12 h): The RSDs of the peak areas of the 12 analytes showed that Ro 1.47%, Rg<sub>1</sub> 1.37%, Re 1.74%, Rf 2.64%, Rg<sub>2</sub> 2.33%, Rh<sub>1</sub> 1.84%, Rb<sub>1</sub> 0.67%, Rc 1.74%, Rb<sub>2</sub> 1.83%, Rb<sub>3</sub> 1.76%, Rd 1.50%, and Rg<sub>3</sub> 2.23% were all less than 3%.

### 3.2. WEG improved motor behavior in PD model mice

The mice behavioral experiments were conducted in two parts, in which the pole test, the traction test, and the rotary test were judgments of the strength of the mice's limbs and were used as the basis for whether the mice had motor impairment. For the Morris water maze test, mice were examined for their spatial learning and memory abilities. We determined whether there was an improvement in Parkinson's behavior based on spatial memory ability.

#### 3.2.1. Comparison of action-behavioral disorders of the limbs in mice

The pole test can be used to evaluate the muscular endurance of mice. The climbing time reflected the fatigue level of mice. A short climbing time decreased the muscular endurance (Fig. 2A). The model group showed a reduced pole climbing time compared with the blank group ( $P < 0.01$ ). The behavioral performance of mice treated with Carbidopa and Levodopa CR Tablets (CLCRT) or WEG was attenuated compared with mice in the modeling group. The P.C. group had a longer pole climbing time compared with the model group ( $P < 0.05$ ). The low group ( $P < 0.0001$ ), which was the group treated with WEG administration, had the longest pole climbing time. The middle group ( $P < 0.05$ ) and the high group ( $P < 0.01$ ) had prolonged time spent compared with the model group. The PD model mice showed significant dysfunction in limb movement coordination, whereas WEG significantly improved their limb coordination motor dysfunction.

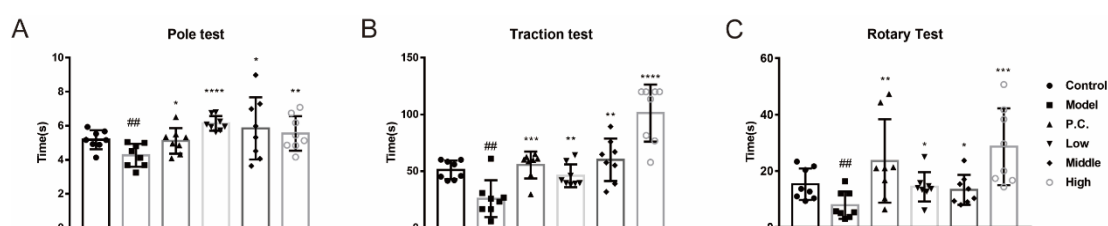

**Fig. 2.** WEG improves body-coordinated motor dysfunction in PD mice. (A) Pole test results. (B) Traction test results. (C) Rotary test results. Statistical analyses were performed using one-way ANOVA: \* $P < 0.05$ , \*\* $P < 0.01$ , \*\*\* $P < 0.001$ , \*\*\*\* $P < 0.0001$  vs. model group. # $P < 0.05$ , ## $P < 0.01$  vs. normal group; mean  $\pm$  SD.

In the traction test (Fig. 2B), grasp time was reduced in the model group ( $P < 0.01$ ) compared with the control group. Grasp time was significantly higher in mice in the high group treated with WEG compared with the model group ( $P < 0.0001$ ). The P.C. group ( $P < 0.001$ ), the low group ( $P < 0.01$ ), and the middle group ( $P < 0.01$ ) had significantly higher grip times.

Experimental results from the rotary test showed (Fig. 2C) that the dwell time was shorter in the model group compared with the control group ( $P < 0.01$ ). When compared with the model group, the residence time on the rotating bar was significantly higher in



the high group treated with WEG ( $P < 0.001$ ). Group WEG had improved dwell time compared with P.C. group ( $P < 0.01$ ), the low group ( $P < 0.05$ ), and the middle group ( $P < 0.05$ ). This result suggested that WEG had the ability to improve the equilibrium disorder in MPTP-induced mice.

Predictors of WEG's ability to improve balance disorders in MPTP-induced mice were indicated by the results of the pole test, rotary test, and traction test.

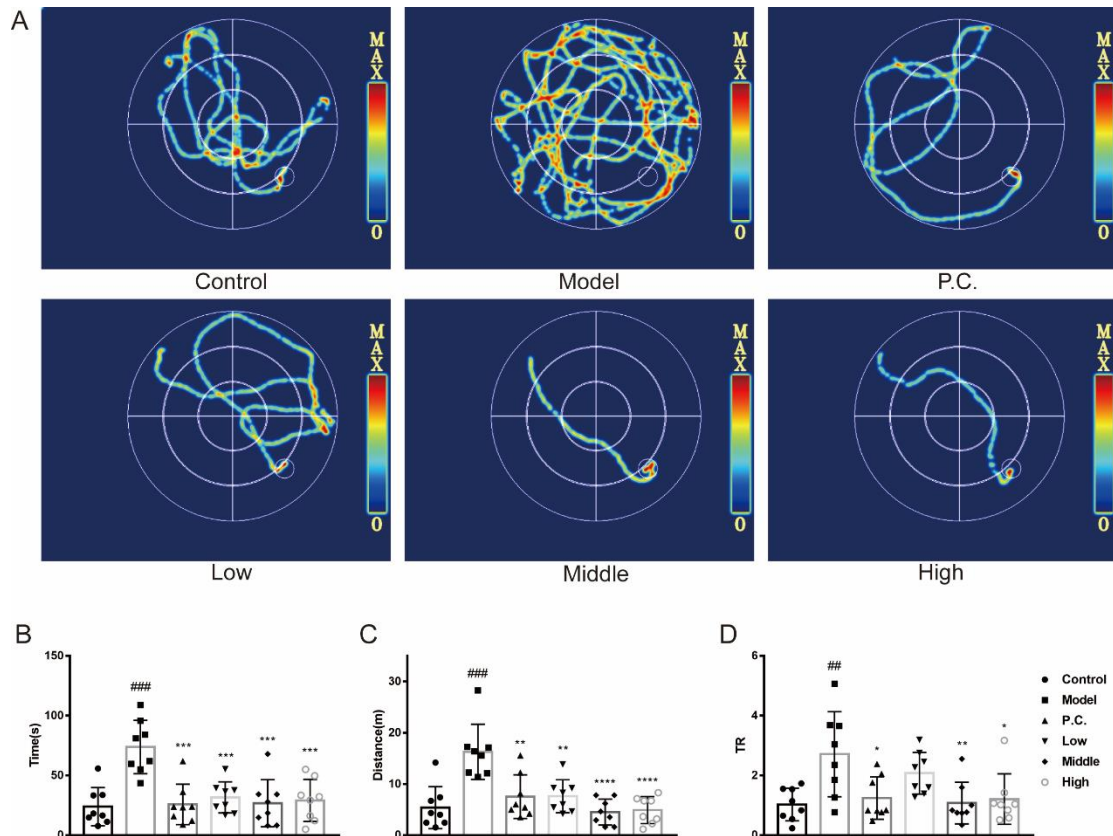

**Fig. 3.** Effect of WEG on the ability of mice to find platforms in the Morris water maze test. (A) Trajectory diagram of platform-seeking ability in mice. (B) Time to find the platform (in seconds). (C) Distance of swimming when finding the platform (meters). (D) Ratio of outer circle swimming time to the sum of central and inner circle swimming time TR. Statistical analyses were performed using one-way ANOVA: \* $P < 0.05$ , \*\* $P < 0.01$ , \*\*\* $P < 0.001$ , \*\*\*\* $P < 0.0001$  vs. model group. # $P < 0.05$ , ## $P < 0.01$ , ### $P < 0.001$  vs. normal group; mean  $\pm$  SD.

### 3.2.2. Spatial learning and memory skills compared

We used the Morris water maze test to assess the spatial learning and memory abilities of mice. For the positioning test (Fig. 3), the time ratios (TR,  $O/(I+M)$ ) of the sum of swimming time in the outer ring to swimming time in the center and swimming time in the inner ring. In the positioning test, the time to find a platform, the distance swum, TR, and the locomotor thermogram were used to provide feedback on the behavioral ability of the mice. Model mice had significantly higher time to find a plateau ( $P = 0.0002$ ), distance ( $P = 0.0005$ ), and TR ( $P = 0.0075$ ) than the control group. Compared with the model group, treatment with CLCRT and WEG significantly reduced swimming time ( $P = 0.0003$  for P.C. group,  $P = 0.0004$  for the low group,  $P = 0.0005$  for the middle group, and  $P = 0.0006$  for the high group), reduced distance ( $P =$

0.0029 for P.C. group,  $P = 0.0016$  for the low group,  $P = 0.0001$  for the middle group, and  $P = 0.0001$  for the high group), and decreased TR values ( $P = 0.0206$  for P.C. group,  $P = 0.2738$  for the low group,  $P = 0.0111$  for the middle group, and  $P = 0.0223$  for the high group).

According to the results of the experiment, the number of passes in the model group ( $P = 0.0083$ ) was significantly less than that of the blank group. Treatment with CLCRT and WEG significantly improved the learning memory ability of the mice. Swimming distance was shorter in the model group compared with the blank group ( $P = 0.00002$ ). TR was greater in the model group ( $P = 0.0014$ ) than in the blank group. There was a greater number of passes over the platform compared with the model group ( $P = 0.0486$  for P.C. group,  $P = 0.0022$  for the low group,  $P = 0.0017$  for the middle group, and  $P = 0.0006$  for the high group). Swimming time was longer compared with the model group ( $P = 0.0047$  for P.C. group,  $P = 0.0114$  for the low group,  $P = 0.0003$  for the middle group, and  $P = 0.0007$  for High). Resting time was shorter compared with the model group ( $P = 0.0047$  for P.C. group,  $P = 0.0114$  for the low group,  $P = 0.0003$  for the middle group, and  $P = 0.0007$  for the high group). Compared with the model group, swimming distance increased ( $P = 0.0006$  for P.C. group,  $P = 0.0119$  for the low group,  $P = 0.0007$  for the middle group, and  $P = 0.0002$  for High). TR values for all groups ( $P = 0.0508$  for P.C. group,  $P = 0.0332$  the low group,  $P = 0.0016$  for the middle group, and  $P = 0.0025$  for the high group) were smaller than the model group. The facts showed that the shortest distance a mouse has to travel to find a platform was across the central two quadrants. From this, we know that the longer the time spent searching for a platform in the outer quadrant among the learning memory of PD mice, the relatively longer the distance a mouse has to travel to find the platform. Thus, the greater the ratio of the time the mice spent swimming in the outer quadrant compared with the time the mice spent swimming in the inner quadrant, the worse the PD mice were at finding platforms and the worse the spatial memory ability of the mice. Spatial memory ability is an examination of the strength of the mice's brain's ability to learn to remember.

WEG was not concentration-dependent in terms of behavioral improvement in PD mice. Compared with CLCRT, the WEG regimen was more effective in reversing behavioral deficits in PD mice.

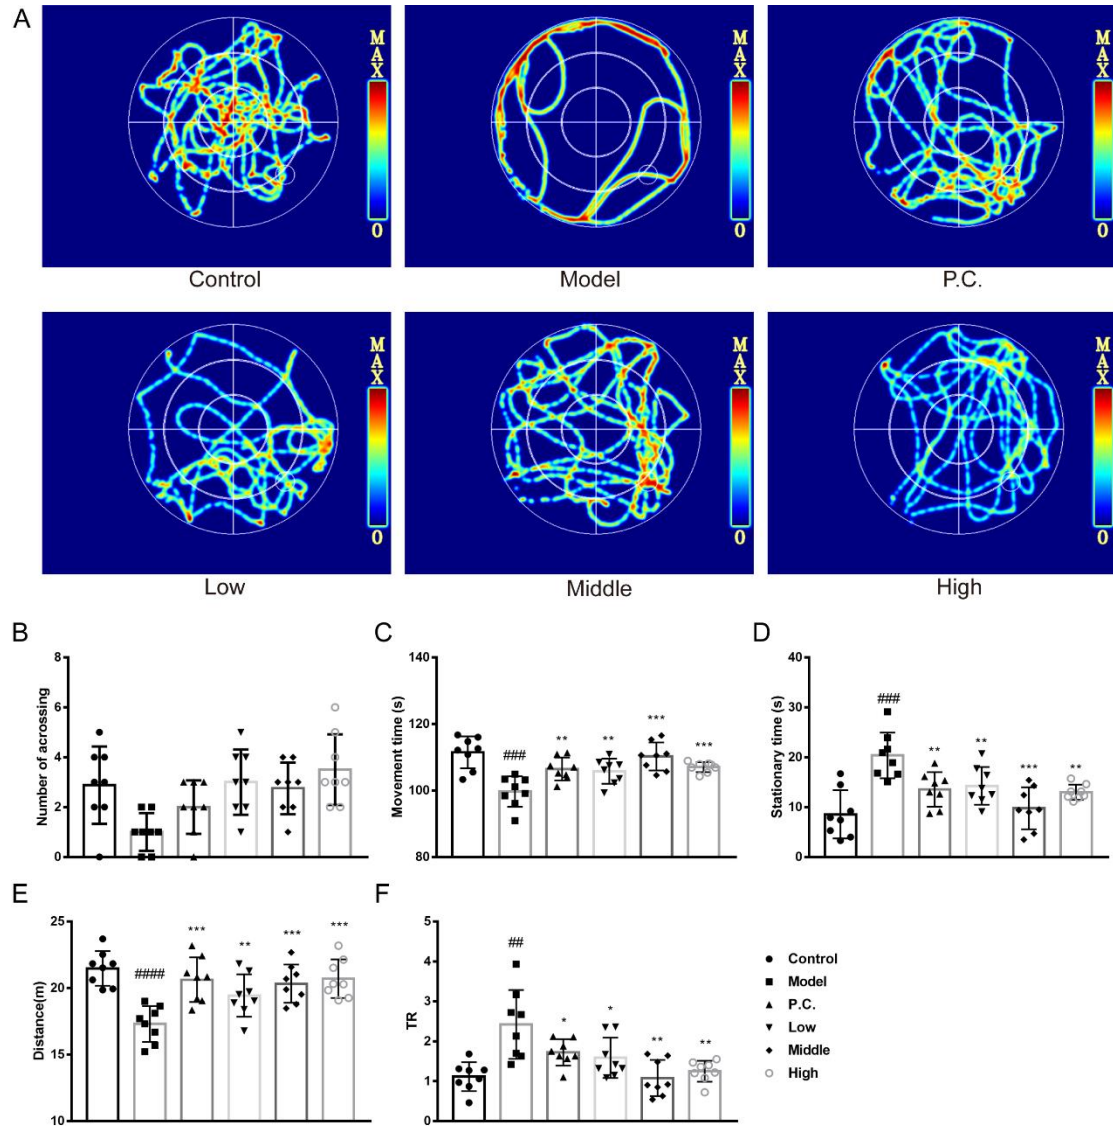

**Fig. 4.** WEG effects on the probing ability of the Morris water maze test in mice. (A) Trajectory diagram of mice swimming. (B) Number of times mice passed the platform position. (C) Time spent swimming. (D) Time spent at rest. (E) Distance swimming by mice. (F) TR. Statistical analyses were performed using one-way ANOVA: \* $P < 0.05$ , \*\* $P < 0.01$ , \*\*\* $P < 0.001$ , \*\*\*\* $P < 0.0001$  vs. model group. # $P < 0.05$ , ## $P < 0.01$ , ### $P < 0.001$  vs. normal group; mean  $\pm$  SD.

### 3.3. WEG improves brain pathological changes in mice

We stained sections of the hippocampal CA1 area in mice with H&E (Fig. 5), and the area ratio of neuronal cells in the CA1 area of the hippocampus and the area ratio of neuronal cells in the striatum were calculated using ImageJ software. The cells in the CA1 area of the hippocampus of the control group were regular in morphology, with plump cell bodies, neat and orderly arrangement, clear nuclei, and intact neuronal morphology (Fig. 5A). In the model group, the CA1 area was damaged to some extent, and the nuclei were blurred, as shown by partial loss of neurons, empty stained cytosol, disordered cell arrangement, significantly reduced number of neurons, and incomplete morphology. The improvement in the P.C. group was not significant (Fig. 5C). Nerve cells in the striatum of mice in the control group had clear structure and normal

morphology with irregular shape (Fig. 5B). In the model group, incomplete cell morphology, scattered neuronal cells, reduced number of neuronal cells, and disorganized arrangement were seen in the striatum. More vacuoles were seen throughout the striatum. Compared with the model group, after treatment with WEG, the neuronal cells in the striatum of mice showed different degrees of restoration of morphological structure, and were more densely and neatly arranged. In addition to an increase in the number of cells (Fig. 5D), their distribution was more uniform, the cell spaces were reduced, and most of the cells returned to normal morphology.

#### 3.4. Evidence of the effect of WEG on the rate of $\alpha$ -Syn positivity in the substantia nigra (SN) and TH positivity in the striatum of PD mice

$\alpha$ -Syn is a key pathological product of PD pathogenesis. We performed IHC experiments on the substantia nigra of the mouse brain using the rabbit antibody  $\alpha$ -Syn (Abcam, ab212184). The results of  $\alpha$ -Syn IHC in the SN are shown in Fig. 6A, and positive ratios were calculated using ImageJ software (Fig. 6C).  $\alpha$ -Syn-positive cells were seen less frequently in the substantia nigra of the control mice, mainly in the cytoplasm and cytosol. We found an increase in  $\alpha$ -Syn positive cells in the substantia nigra in the model group compared with the control group ( $P < 0.0000$ ). CLCRT and WEG reduced the rate of  $\alpha$ -Syn positivity in the substantia nigra. WEG improved the aggregation of  $\alpha$ -Syn in the brain of MPTP-induced PD mice. We performed assays for striatal IHC of mice brains using the rabbit antibody TH (Abcam, ab137869), and positive ratios were calculated using ImageJ software (Fig. 6B and 6D). In the striate tissue of the control group, TH-positive cells were more abundant, mainly in the cytoplasm and cytosol, than in the blank group ( $p < 0.0000$ ). Striatal TH positivity was increased in the model group compared with the striatum ( $P < 0.0000$  for all groups).

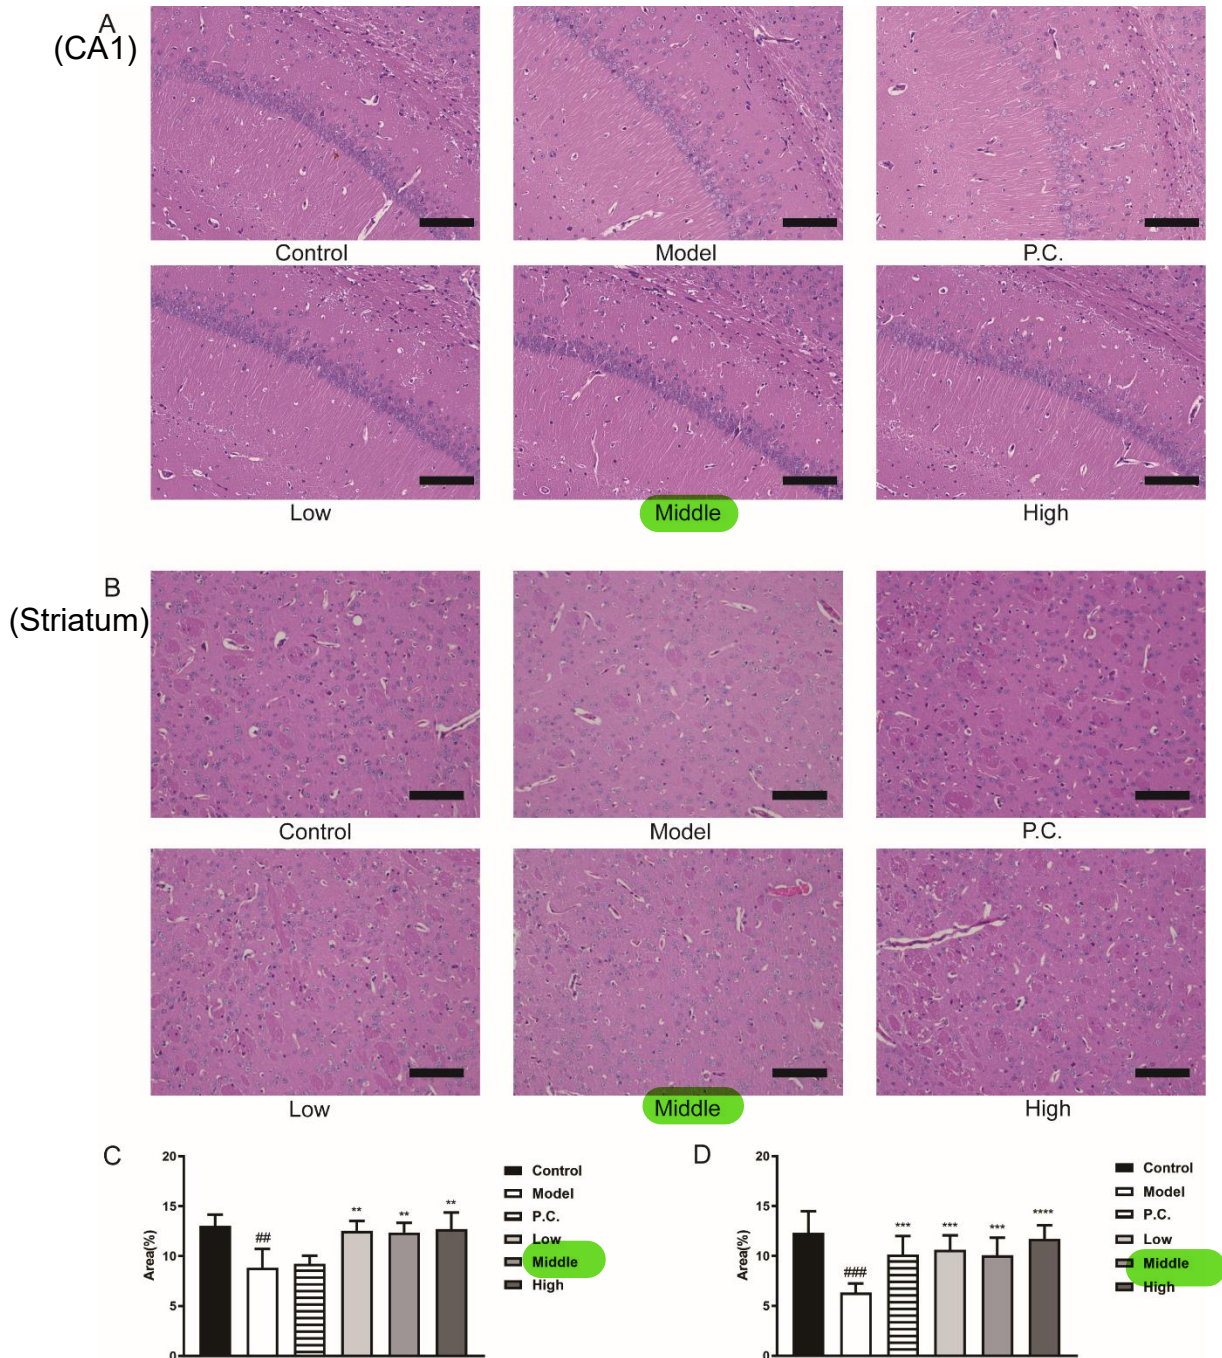

**Fig. 5.** WEG effects on MPTP-induced pathological changes in the hippocampal CA1 region and striatum of mice. (A) H&E staining of the hippocampal CA1 region of mice ( $\times 200$ ,  $100 \mu\text{m}$ ). (B) H&E staining of the striatum of mice ( $\times 200$ ,  $100 \mu\text{m}$ ). (C) Percentage of neuronal cells in CA1 region of hippocampus (%). (D) Percentage of neuronal cells in the striatum (%). Statistical analyses were performed using one-way ANOVA: \* $P < 0.05$ , \*\* $P < 0.01$ , \*\*\* $P < 0.001$ , \*\*\*\* $P < 0.0001$  vs. model group. # $P < 0.05$ , ## $P < 0.01$  vs. normal group; mean  $\pm$  SD.

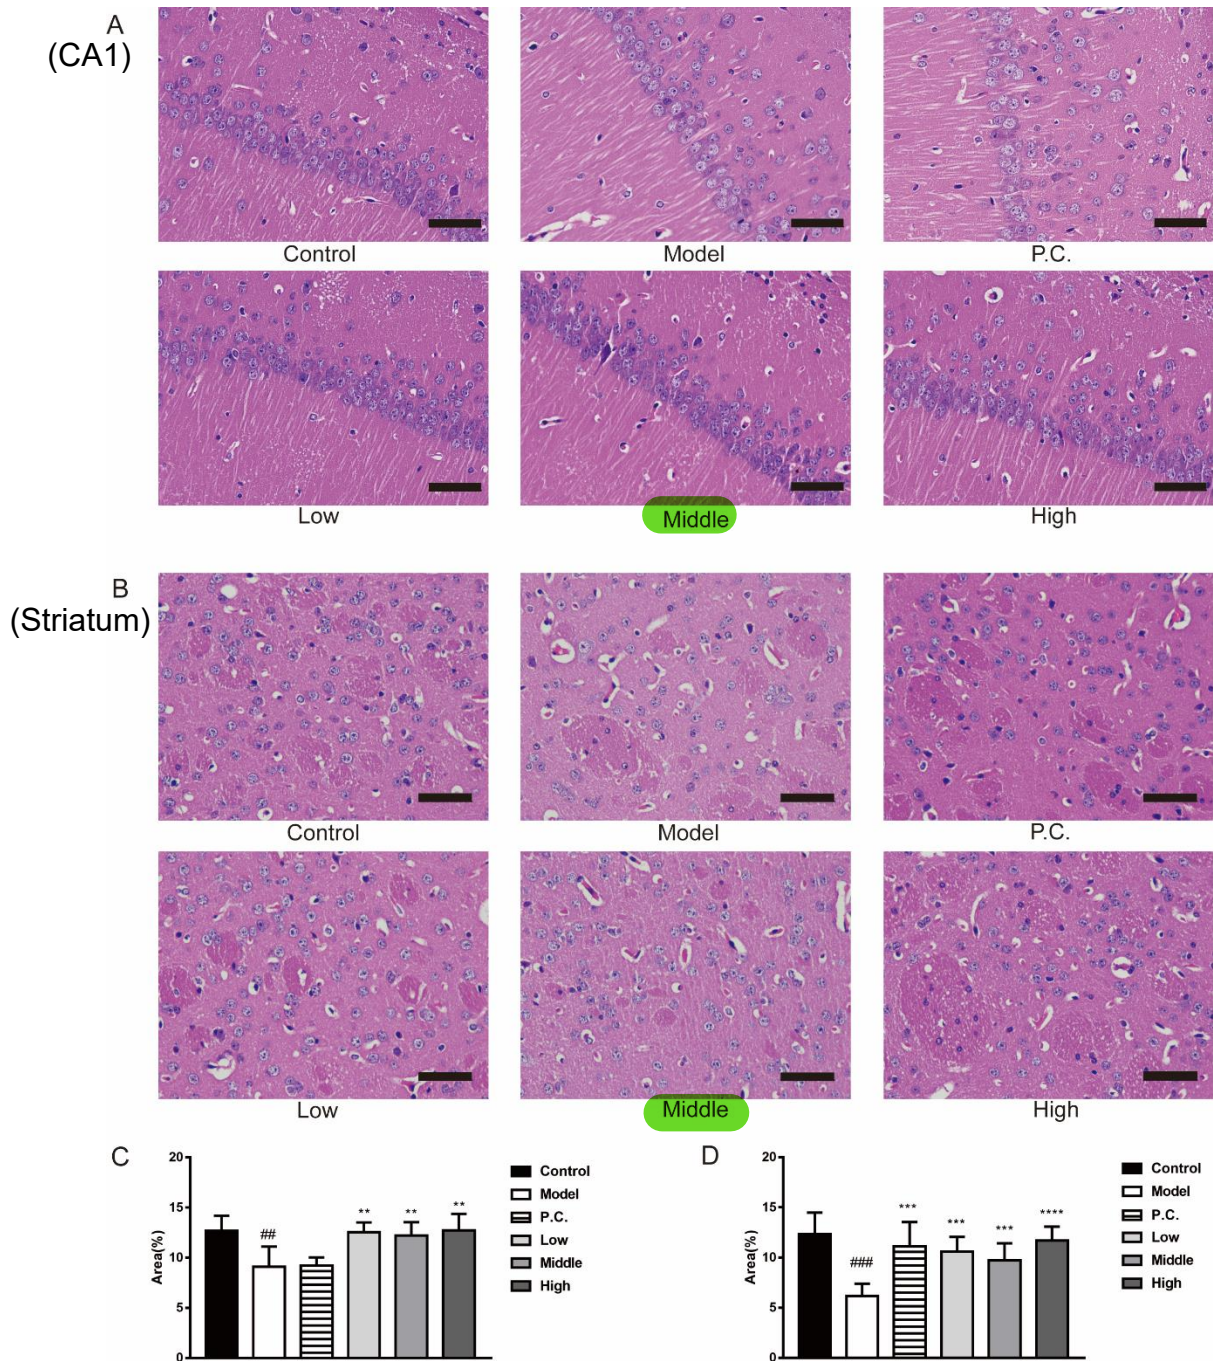

**Fig. 5.** WEG effects on MPTP-induced pathological changes in the hippocampal CA1 region and striatum of mice. (A) H&E staining of the hippocampal CA1 region of mice ( $\times 400$ ,  $50 \mu\text{m}$ ). (B) H&E staining of the striatum of mice ( $\times 400$ ,  $50 \mu\text{m}$ ). (C) Percentage of neuronal cells in CA1 region of hippocampus (%). (D) Percentage of neuronal cells in the striatum (%). Statistical analyses were performed using one-way ANOVA: \* $P < 0.05$ , \*\* $P < 0.01$ , \*\*\* $P < 0.001$ , \*\*\*\* $P < 0.0001$  vs. model group. # $P < 0.05$ , ### $P < 0.01$  vs. normal group; mean  $\pm$  SD.

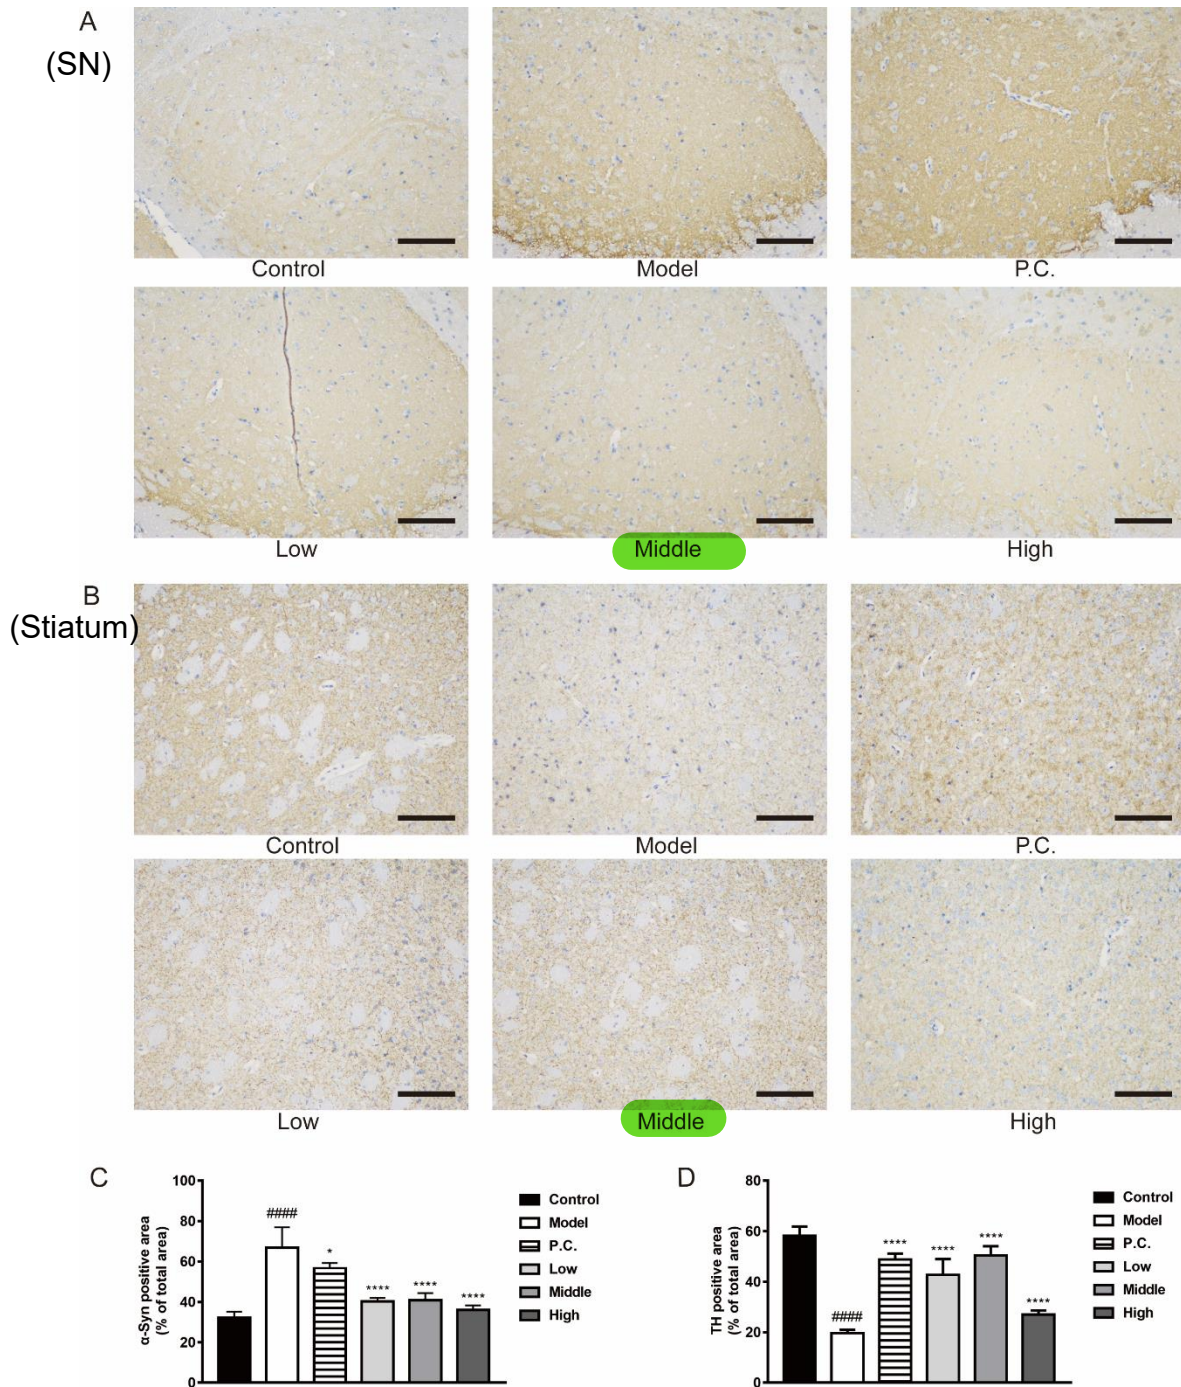

**Fig. 6.** WEG results of IHC experiments in the brain of PD mice. (A) IHC staining of WEG for positive expression of  $\alpha$ -syn in the SN of PD mice ( $\times 200$ ,  $100 \mu\text{m}$ ). (B) IHC staining of WEG for positive expression of TH in the striatum of PD model mice ( $\times 200$ ,  $100 \mu\text{m}$ ) Percentage of area positive for  $\alpha$ -syn in each group (%). (D) Percentage of area positive for TH in each group (%). Statistical analyses were performed using one-way ANOVA: \* $P < 0.05$ , \*\* $P < 0.01$ , \*\*\* $P < 0.001$ , \*\*\*\* $P < 0.0001$  vs. model group. # $P < 0.05$ , ## $P < 0.01$ , ### $P < 0.001$ , #### $P < 0.0001$  vs. normal group; mean  $\pm$  SD.

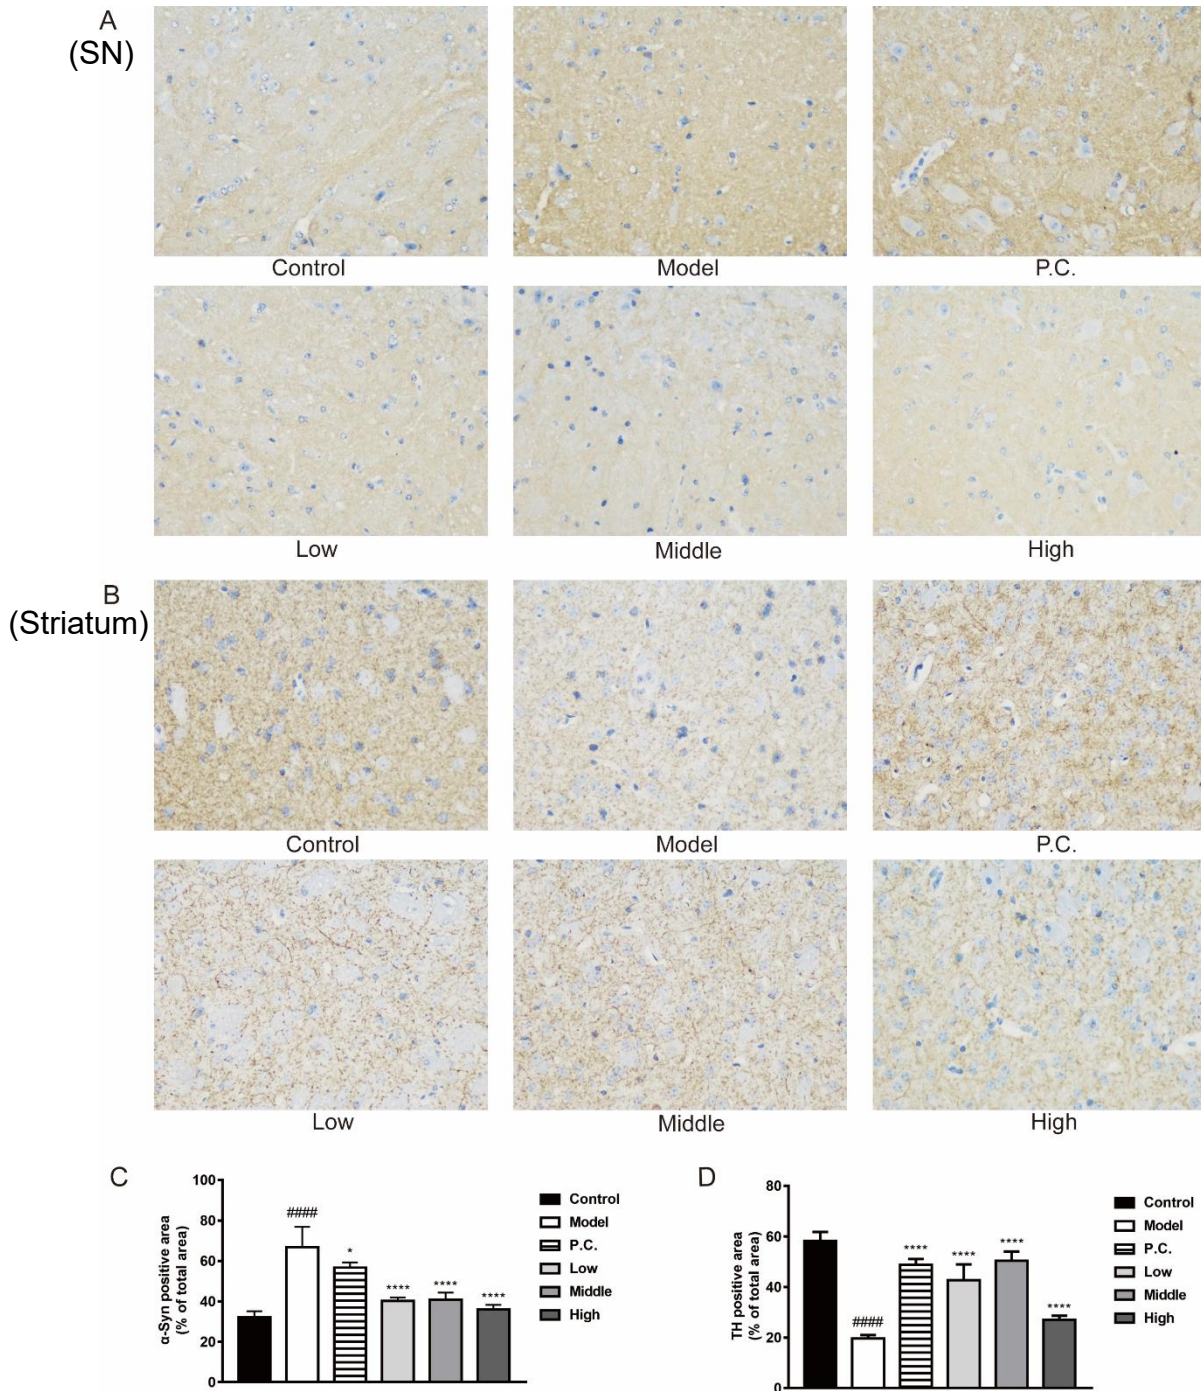

**Fig. 6.** WEG results of IHC experiments in the brain of PD mice. (A) IHC staining of WEG for positive expression of  $\alpha$ -syn in the SN of PD mice ( $\times 400$ ,  $50 \mu\text{m}$ ). (B) IHC staining of WEG for positive expression of TH in the striatum of PD model mice ( $\times 400$ ,  $50 \mu\text{m}$ ) Percentage of area positive for  $\alpha$ -syn in each group (%). (D) Percentage of area positive for TH in each group (%). Statistical analyses were performed using one-way ANOVA: \* $P < 0.05$ , \*\* $P < 0.01$ , \*\*\* $P < 0.001$ , \*\*\*\* $P < 0.0001$  vs. model group. # $P < 0.05$ , ### $P < 0.01$ , #### $P < 0.001$ , ##### $P < 0.0001$  vs. normal group; mean  $\pm$  SD.

### 3.5. Effect of WEG on the expression levels of TH and $\alpha$ -Syn protein in the brain of PD mice

With a view of exploring the treatment action of WEG on MPTP-induced PD in mice,



we assessed TH and  $\alpha$ -Syn activation according to western blot (Fig. 7). The MPTP treated mice in the model group showed significantly reduced expression of TH and significantly increased expression of  $\alpha$ -Syn in brain tissue compared with the control group. The expression level of TH protein was up-regulated and that of  $\alpha$ -Syn protein was significantly down-regulated in the brain tissue of mice after WEG intervention. WEG had a neuroprotective effect on MPTP-induced PD mice and improved the expression levels of TH and  $\alpha$ -Syn in the brain.

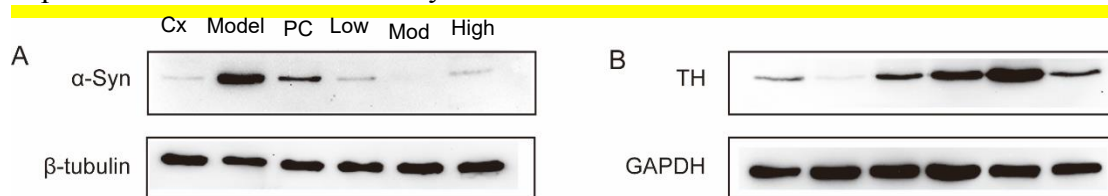

**Fig. 7.** Effect of WEG therapy on expression of (A)  $\alpha$ -Syn and (B) TH. From left to right samples are in order of control, model, P.C., low, middle, and high groups.

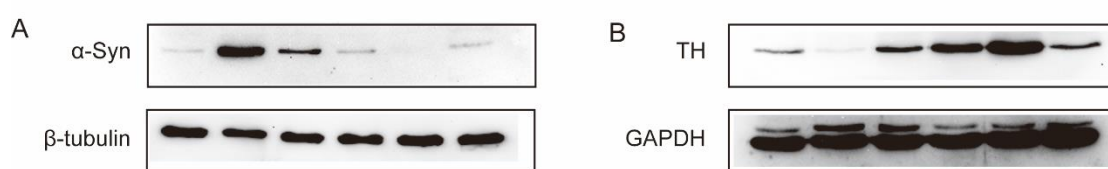

**Fig. 7.** Effect of WEG therapy on expression of (A)  $\alpha$ -Syn and (B) TH. From left to right samples are in order of control, model, P.C., low, middle, and high groups.

### 3.6. WEG improves pathological changes in the small intestine

We performed H&E staining (Fig. 8A) and periodic acid-Schiff (PAS) staining (Fig. 8B) on sections of mouse small intestine, and calculated the length of the small intestinal villus ( $\mu$ m) as well as the area ratio of goblet cells (%) using ImageJ software. The intestinal mucosa of the small intestine of the blank group of mice was pink, with intact and regular villus structure and neat margins; the crypt was relatively shallow, the small intestinal glands were intact, and the number of goblet cells was high (PAS treatment showed positive results). Compared with the control group, the model group showed broken or detached small intestinal villus ( $P = 0.0000$ ), a significant decrease in the number of goblet cells ( $P = 0.0000$ ), significant destruction of the villus structure, and more severe damage to the small intestinal glands. WEG had an improvement effect on intestinal tissue in PD model mice. Compared with the model group, the WEG-treated mice showed longer villus length ( $P = 0.0414$  for the low group,  $P = 0.0040$  for the middle group, and  $P = 0.0004$  for the high group) and a higher number of goblet cells ( $P = 0.0017$  for the low group,  $P = 0.0149$  for the middle group, and  $P = 0.0004$  for the high group). ( $P = 0.0149$  for the middle group and  $P = 0.0001$  for the high group.) The reduced depth of the crypt was associated with improved damage to the intestinal mucosa and small intestinal glands and a corresponding increase in the digestion and absorption of nutrients.

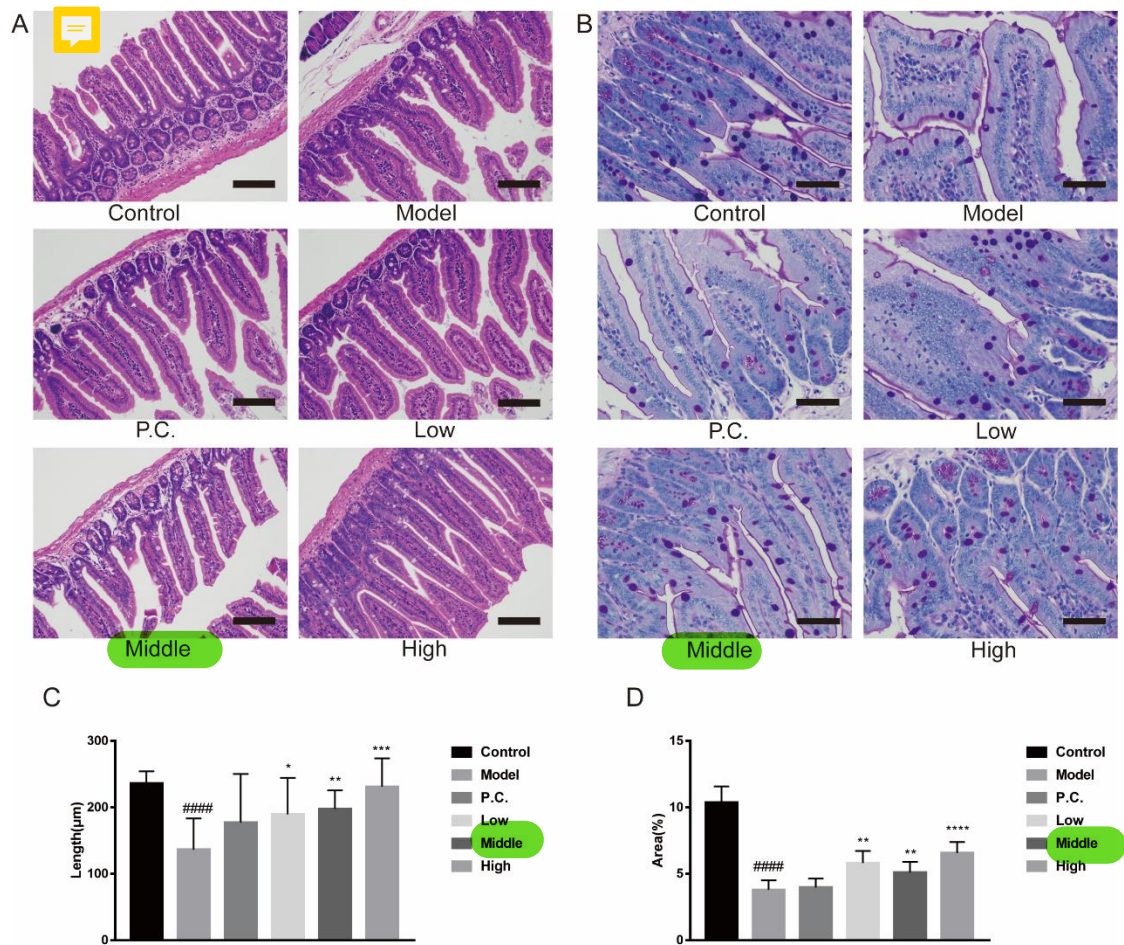

**Fig. 8.** Effect of WEG on MPTP-induced histopathological changes in the small intestine of mice. The small intestine of mice was stained with H&E and PAS to observe the morphological changes in the small intestine. (A) H&E staining of small intestine ( $\times 200$ ). (B) PAS staining of small intestine ( $\times 400$ ). (C) Length of small intestine villi in each group ( $\mu\text{m}$ ). (D) Positive area in each group of sections (%). Statistical analyses were performed using one-way ANOVA: \* $P < 0.05$ , \*\* $P < 0.01$ , \*\*\* $P < 0.001$ , \*\*\*\* $P < 0.0001$  vs. model group. # $P < 0.05$ , ## $P < 0.01$ , ### $P < 0.001$  #### $P < 0.0001$  vs. normal group, mean  $\pm$  SD.

### 3.7. WEG improves gut microbiota dysbiosis in PD mice

In this study, the effects of different doses of WEG on the gut microbiota of PD mice were observed from different units. According to structural analysis of the microbial colonies at the phylum unit for comparison among groups, the following seven phyla were common to all samples: Firmicutes, Bacteroidetes, Proteobacteria, Saccharibacteria (TM7), Actinobacteria, Deferribacteres, and Tenericutes. Normal mice gut microflora consisted mainly of Firmicutes and Bacteroidetes, with the sum of the two accounting for more than 97% of the total microflora. The relative abundance ratios of Firmicutes and Bacteroidetes were analyzed comparatively. The model group had less Firmicutes ( $P < 0.0000$ ) and more Bacteroidetes ( $P = 0.0001$ ) compared with the control group. Compared with the model group, the WEG resulted in an increased proportion of Firmicutes ( $P = 0.0059$  for the low group,  $P = 0.0365$  for the middle group, and  $P = 0.0124$  for the high group) and a decreased proportion of Bacteroidetes in the mice intestine ( $P = 0.0026$  for the low group,  $P = 0.0347$  for the middle group, and  $P =$

0.0090 for the high group). In addition, CLCRT caused an increase in the proportion of Firmicutes ( $P = 0.0001$ ) and a decrease in the proportion of Bacteroidetes ( $P = 0.0002$ ) in the intestine of mice.

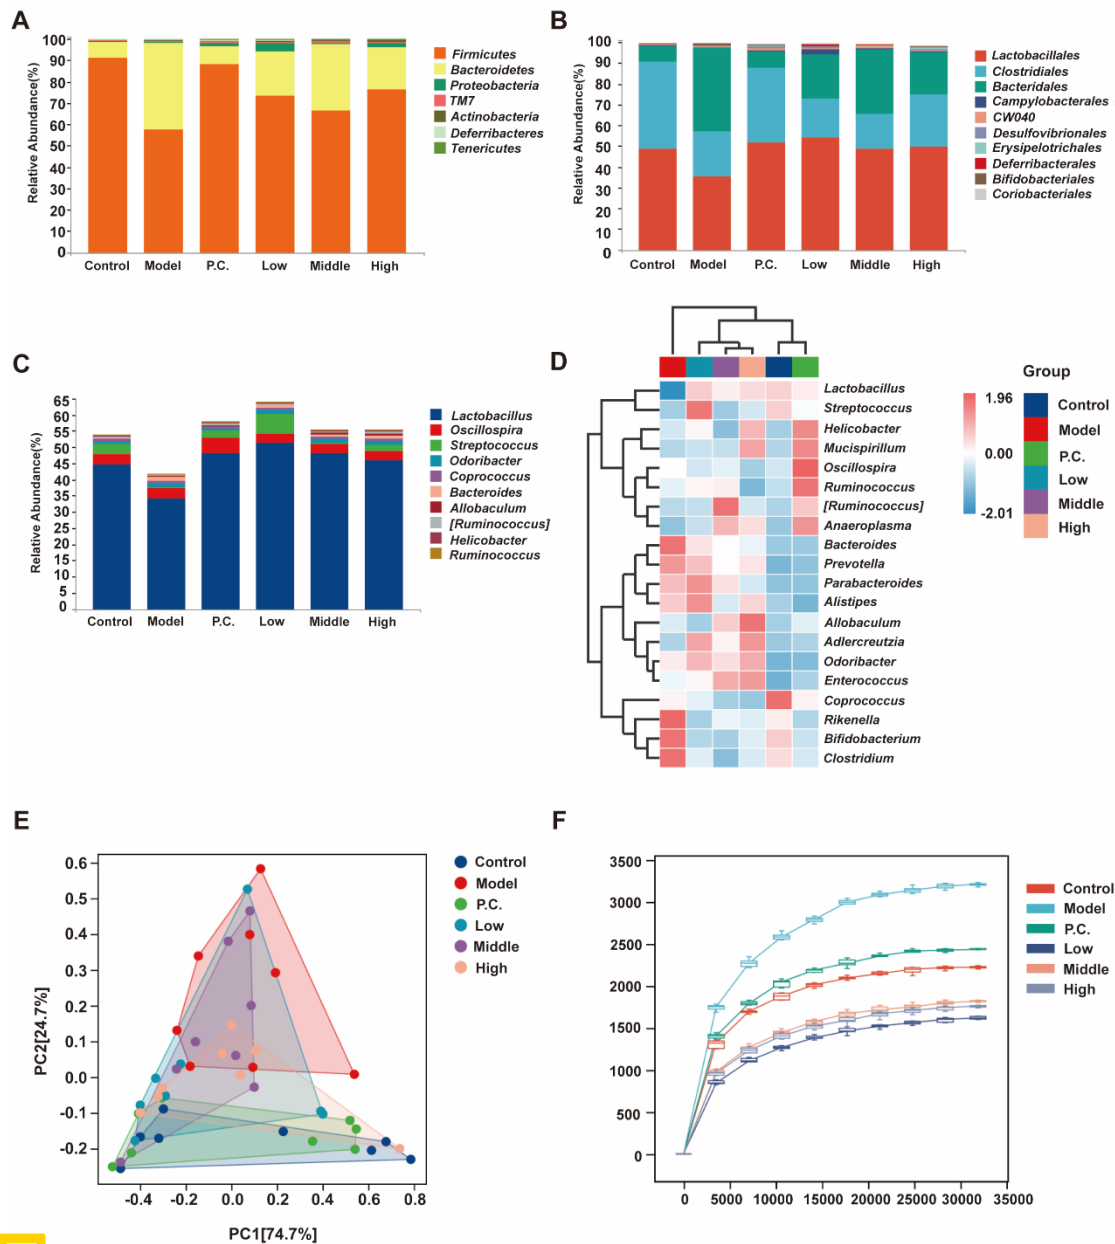

**Fig.9.** Effect of WEG in different basic units on the composition of gut microflora in PD mice. (A) Effect of WEG based on order species unit on gut microflora in PD mice. (B) Effect of WEG based on phylum species unit on gut microflora in PD mice. (C) Effect of WEG based on genus species unit on gut microflora in PD mice. (D) Heat map for genus unit based. (E) Principal component analysis. (F) Rarefaction curves based on Chao1 index.

According to the microbial colony structure analysis at the order level, the normal mice gut microbiota consisted mainly of the orders Lactobacillales, Clostridiales, and Bacteroidales, accounting for more than 97% of the total number of bacteria. Lactobacillales were reduced in the model group compared with the control group ( $p = 0.0016$ ). Both CLCRT and WEG increased the amount of Lactobacillales in the intestine of mice compared with the model group ( $P = 0.0038$  for the P.C. group,  $P =$

0.0001 for the low group,  $P = 0.0306$  for the middle group, and  $P = 0.0044$  for the high group). Bacteroidales were less abundant in the model group compared with the control group ( $P = 0.0055$ ). Both CLCRT and high doses of WEG elevated the amount of Clostridiales in the intestine of mice compared with the model group ( $P = 0.0304$  for the P.C. group and  $P = 0.0509$  for the high group), but the low and middle doses of WEG did not have a significant effect on Clostridiales in the intestine of mice. Bacteroidales were reduced in the Modelmodel group compared with the control group ( $P = 0.0001$ ). Both CLCRT and WEG resulted in increased levels of Bacteroidales in the intestine of mice compared with the model group ( $P = 0.0002$  for the P.C. group,  $P = 0.0026$  for the low group,  $P = 0.0347$  for the middle group, and  $P = 0.0071$  for the high group).

According to the genus unit microbial colony structure analysis, the normal mice gut microflora consisted mainly of *Lactobacillus*, *Oscillospira*, and *Streptococcus*, accounting for more than 50% of the total bacterial flora. *Lactobacillus* levels were reduced in the model group compared with the control group ( $P = 0.0052$ ) and *Streptococcus* levels were also reduced in the model group ( $P = 0.0054$ ). Both CLCRT and WEG increased *Streptococcus* levels in the intestine of mice compared with the model group ( $P = 0.0107$  for the P.C. group,  $P = 0.0001$  for the low group, and  $0.0102$  for high group). Ginseng showed significant improvement in gut microbiota disorders in PD mice after a low-dose WEG administration, which most closely resembled the gut flora composition of normal mice. In addition, *Oscillospira* was not significantly different between the groups, although *Oscillospira* accounted for approximately 3% of the gut microbiota of the mice. MPTP-induced PD was not associated with *Oscillospira*, however, and we did not find any significant difference between the groups. The WEG intervention significantly increased the levels of beneficial bacteria, such as *Lactobacillus*. Treatment with WEG restored the abundance of probiotic bacteria and reduced the levels of harmful microflora.

We drew a clustering heat map based on the genus unit, reflecting the trend of species abundance distribution among the groups, with red representing positive correlation and blue representing negative correlation (Fig. 9D). The figure clearly shows that the model group clustered separately, whereas the remaining five treatment groups clustered into one category with the normal group. Among them, WEG not only interfered with the elevation of beneficial genera, such as *Lactobacillus*, but also made the elevation of other beneficial genera related to glycolipid metabolism, such as *Allobaculum* and *Adlercreutzia*, which improved the flora environment in the body.

High doses of WEG did not reduce the level of *Odoribacter* and *Enterococcus* and other genera in the intestine, but rather elevated them. Therefore, although a high dose of WEG could improve PD, it also affected the intestinal bacteria in mice. As shown by the principal component score plot, the WEG and CLCRT treatment groups were relatively concentrated with the blank group in terms of dispersion, and the model group had less overlap with the rest of the groups. Additionally, the first principal component in this principal component analysis accounted for 74.7%, and the second principal component accounted for 24.7%, with a cumulative contribution value of 99.4%, reaching more than 85% of the eigenvalues (Fig. 9E).

We conducted an evaluation of community richness and diversity in the gut of mice using the alpha-diversity index. A rarefaction curve was plotted using the index type Chao1 index (Fig. 9F). When the extraction depth reached above 20,000, the rarefaction curve leveled off, indicating that the amount of sequencing was sufficient to cover all taxa in the sample. For a more comprehensive assessment of the alpha diversity of the microbial community, we used an index such as Chao1 (Fig. 10A). In the alpha-diversity analysis, the indices for each WEG dosing group were close to the control group with significant differences compared with the model group ( $p < 0.05$  for all group). The results of the alpha analysis indicated that treatment with WEG normalized the diversity and richness of the gut bacterial flora. Beta diversity was analyzed using both principal coordinates analysis (PCoA) and nonmeasured multidimensional scale analysis (NMDS) to describe the variability of the samples (group to group). We evaluated the distance of similarity between samples by NMDS analysis (Fig 10B). The distances between the model group and the other groups were clearly separated, while the WEG treatment group was close to the control group. The results indicated that treatment with WEG led to a convergence of intergroup variability in the gut microbiota of PD mice with the normal group.

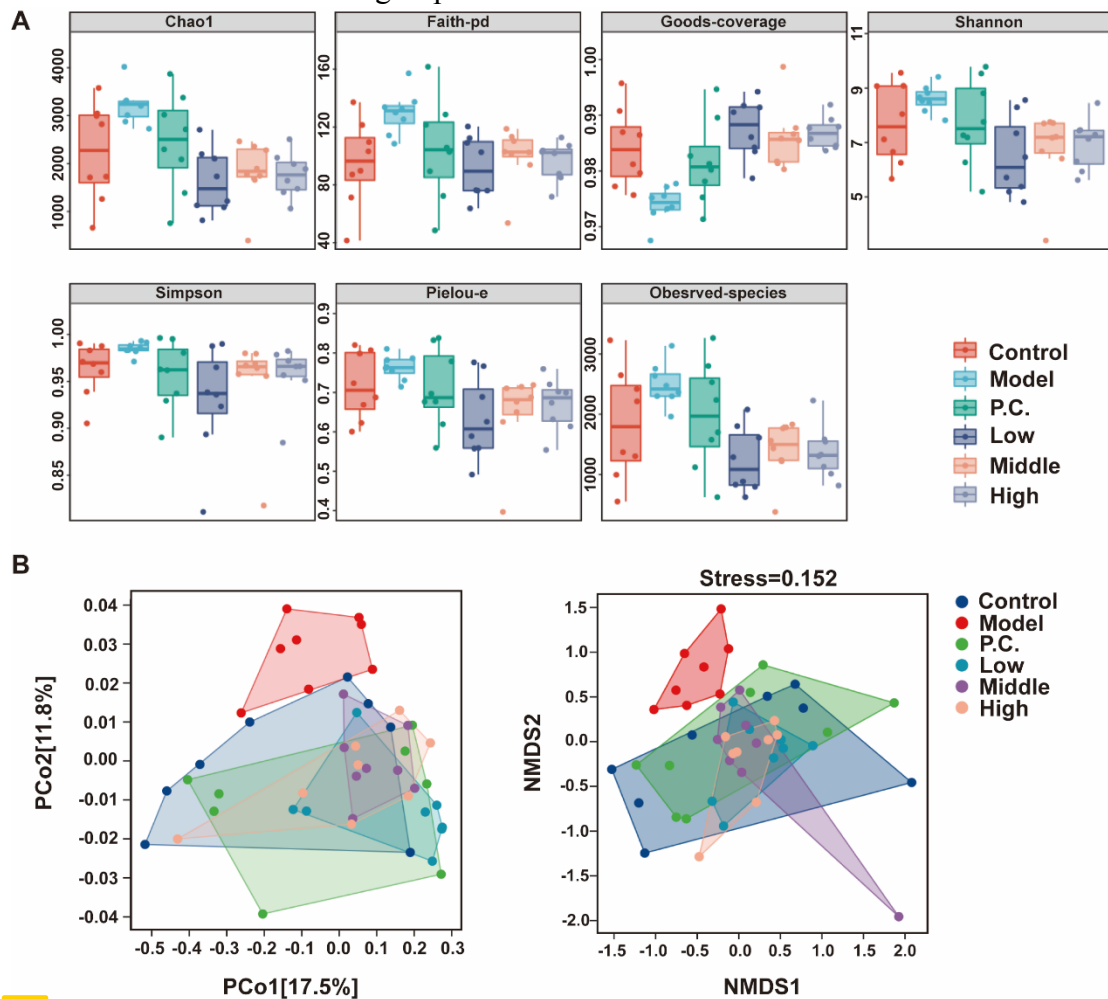

**Fig. 10.** Effect of WEG on the abundance and diversity of gut microbiota in PD mice. (A) Results of the alpha-diversity evaluation according to each index. (B) PCoA and NMDS results of beta diversity.

#### 4. Discussion

Ginseng has complex active components, and the chemical composition of ginseng extracts obtained under different processing conditions varies greatly [37]. The choice of temperature and solvent influenced the ratio of various chemical components in the extract of ginseng [38]. Kim et al. found that the content of protopanaxadiol (PPD)-type ginsenosides in ginseng decreased with increasing temperature, whereas the content of protopanaxatriol (PPT)-type ginsenosides increased after high temperature conversion, and the content of some ginsenosides, such as ginsenoside Rf, decreased with increasing temperature [39-41]. The conventional method of high -temperature extraction of ginseng broke down the proteins in ginseng, resulting in a near-absent protein content in the resulting sample [42-44]. The contents of polysaccharides, ginsenosides, and proteins in ginseng were 40%, 4%, and 10%, respectively [45-47]. In this study, the contents of ginseng polysaccharides, ginsenosides, and proteins in WEG obtained using mild extraction conditions of low temperature and water extraction were 26.58%, 3.85%, and 7.36%, respectively. Our study was statistically evaluated with behavioral and histopathological data from mice. We found that WEG had a significant ameliorative effect on MPTP-induced PD mice, based on the pharmacological effects exerted by the joint coordination between the three main compounds in WEG. For MPTP-induced impairment of brain  $\alpha$ -Syn accumulation in mice, our study found that oral administration of WEG was sufficient to reduce brain  $\alpha$ -Syn accumulation and increase TH content in PD mice.

MPTP freely crosses the blood–brain barrier and is converted to MPP<sup>+</sup> in the brain by astrocytes. MPP<sup>+</sup> is selectively taken up by dopaminergic cells and inhibits mitochondrial complexes in the respiratory chain [48]. MPTP toxicity-induced PD models are well-established animal models, and numerous studies have shown that MPTP can cause impaired learning memory in humans, mice, and primates [49]. MPTP is the only environmental factor directly associated with the development of levodopa-responsive PD, which is clinically indistinguishable from PD. Similar chemicals abound, however, supporting the hypothesis that substances in the environment may contribute to this disorder [50]. Some scholars found that ginsenoside Rb<sub>1</sub> could alleviate MPTP-induced gait kinetic dysfunction and cognitive impairment in mice, suggesting that ginsenoside Rb<sub>1</sub> has neuroprotective mechanisms in PD mice [51]. We performed pathological studies on the hippocampal CA1 and striatum of MPTP-injured mice and the small intestine of mice and discovered that damaged neuronal cells in the CA1 and striatum of WEG-treated mice were improved, and the number of neuronal cells increased and the cell morphology largely returned to normal after treatment with WEG. Furthermore, WEG also had a significant therapeutic effect on the damaged mice intestine, with improvements in the damaged intestinal mucosa and small intestinal glands, and a corresponding increase in the digestion and absorption of nutrients.

People with PD suffer from clinical manifestations of tremor, muscle tonus, motor bradykinesia, and postural dysreflexia. Its main pathological manifestations are pathophysiological loss or degeneration of dopaminergic neurons in the midbrain substantia nigra and the development of neuronal Lewy bodies with reduced striatal dopamine levels. Moreover, PD is based on the brain, so the examination of learning

and memory abilities is also the focus of behavioral tests in mice [52-56]. Success in simulating working memory deficits and other cognitive impairments in PD also have been reported for the MPTP model [57-60]. First, we used behavioral tests, such as the pole test, to determine the strength of the limbs as a basis for the presence of motor deficits in mice. MPTP altered the locomotor ability of the mice, suggesting that these mice had a locomotor deficit, whereas treatment with WEG improved the mice's locomotor impairment well, which was consistent with our previously hypothesized results. Notably, the results of the Morris water maze test provided a more intuitive sense that WEG could improve motor retardation and learning memory abilities in mice. These results support the finding that WEG can improve spatial learning and cognitive abilities in mice already disturbed by MPTP in in vivo experiments.  $\alpha$ -Syn, a key protein in PD development, and Lewy bodies formed by  $\alpha$ -Syn aggregation are the main pathological features of PD [61]. Min et al. proposed that gintonin, a glycolipid protein isolated from ginseng, has some neuroprotective effects. Gintonin's neuroprotective effects were associated with reduced accumulation of  $\alpha$ -Syn in the substantia nigra and striatum of MPTP-induced PD mice, and the neuroprotective effect of gintonin was further validated via analyzing the effect of gintonin on MPP<sup>+</sup> treated SH-SY5Y cells [62]. This result is consistent with the findings in this study that WEG intervention reduced the accumulation of  $\alpha$ -Syn and thus acted as a neuroprotective agent. This finding also revealed that WEG has played a role in resisting the progression of PD, and the results of both WB and IHC experiments suggested that WEG clearance of  $\alpha$ -Syn appears to be more effective than CLCRT given alone. Additionally, it is important to measure the TH levels in the brain. TH catalyzes the rate-limiting step in the synthesis of the neurotransmitter dopamine and other catecholamines. TH enzymes play an important role in dopamine synthesis and are abundant in dopaminergic neurons. Therefore, TH is used as a marker of dopaminergic neurons and plays an important role in the pathophysiology of PD [63]. Establishing the beneficial effect of gintonin on MPTP-induced nigrostriatal TH loss in previous reports has confirmed the hypothesis that gintonin can restore reduced TH expression in MPTP-treated mice [64]. We found that the MPTP-induced decrease in TH levels in the mouse brain and the intervention of WEG modulated the increase in intracranial TH levels, thus preventing the loss of TH in the skull and acting as a neuroprotective agent.

Early studies have found that the etiology of PD may originate in the gut [65]. Researchers detected  $\alpha$ -Syn in the intestinal mucosa and submucosal nerve fibers of PD patients, and found that  $\alpha$ -Syn in the gut could be transported to the brain through the vagus nerve, thus providing a basis for the hypothesis that the origin of PD may come from outside the brain in the gut [66]. Changes in the composition of the gut microflora also have been observed in the intestines of patients with PD [67]. When mice were cocolonized with the flora of PD patients by the fecal microbiota transplantation technique, the mice exhibited typical signs of PD such as motor deficits and neuroinflammation [68]. Previous studies have reported that MPTP induction can increase the number of some pathogens and have confirmed that MPTP neurotoxicity to the brain can lead to intestinal dysfunction and ultimately alter gut flora in PD patients [69-70]. This study confirmed that MPTP did have a detrimental effect on the

intestine and gut microbiota of mice, whereas WEG not only improved the intestinal tissues, but also had the ability to improve the disordered flora of mice. WEG increased the proportion of Firmicutes and decreased the proportion of Bacteroidetes in the intestine of mice and repaired the disordered gut microbiota, resulting in a normal regulation of the active system of the flora. The gut microbiota is complex in structure and consists of four main bacterial phyla. The thick-walled phylum is predominant (50–75%), followed by the phylum Bacteroides (10–50%), the phylum Actinomycetes, and the phylum Aspergillus [71]. Elevated flora of either phylum will affect the levels of other species and lead to disorders. We found a decrease in *Lactobacillus* abundance in the model group and a significant increase with oral WEG, and other studies also have confirmed that elevated values of *Lactobacillus* abundance are important for improving the gut microbiota environment [72-73]. The high dose of WEG in this study improved PD and also had an effect on the gut microbiota of the mice. Even though the high dose of WEG had the best effect on the repair of the intestinal environment, the treatment was better for the low dose of WEG. Thus, the hypothesis that an imbalance of gut microbiota may indirectly contribute to the pathogenesis of PD is further supported by the fact that the mechanism of change in gut microbiota regulation by WEG. Whether or not WEG can be used in combination with CLCRT needs to be further explored. Also, our study has not investigated which metabolic pathways are involved in the neuroprotective mechanism of WEG improvement in PD mice, and this pathway should be investigated in subsequent experiments.

## 5. Conclusion

This study used a low-temperature extraction technique to obtain WEG with high retention of active ingredients, and MPTP intraperitoneal injection was used to construct an in vivo PD model. We demonstrated that WEG could repair intestinal damage and improve gut microbiota dysbiosis in PD mice. We also demonstrated that WEG could significantly improve behavioral functions and inhibit the accumulation of  $\alpha$ -Syn in the brain via regulating the level of TH in the brain, thus exerting neuroprotective effects in PD mice. The study provides a new approach to the pharmacological treatment of PD, further supports the hypothesis that the pathogenesis of PD is related to the gut, and offers a research basis for whether WEG may be a suitable treatment for other degenerative diseases.

## 6. Ethics Statements

Animals were raised and experimented according to the guidance of the Animal Care Committee of Changchun University of Chinese Medicine.

CRedit authorship contribution statement

**Ning Xu:** Methodology, Investigation, Software, Formal analysis, Writing—original draft, Writing—review & editing, Visualization. **Shuyang Xing:** Methodology, Writing—review & editing. **Jie Li:** Project administration, Formal analysis, Data curation. **Bo Pang:** Methodology, Data curation. **Meichen Liu:** Methodology, Writing—review & editing, Funding acquisition. **Meiling Fan:** Resources, Project administration. **Yu Zhao:** Conceptualization, Methodology, Resources, Formal analysis, Investigation, Writing—original draft, Funding acquisition, Supervision.

## Declaration of Competing Interest



The authors declare that they have no known competing financial interests or personal relationships that could have appeared to influence the work reported in this paper.

## References

- [1] Samii, A., Nutt, J. G., & Ransom, B. R. (2004). Parkinson's disease. *Lancet* (London, England), 363(9423), 1783–1793. [https://doi.org/10.1016/S0140-6736\(04\)16305-8](https://doi.org/10.1016/S0140-6736(04)16305-8)
- [2] Reich, S. G., & Savitt, J. M. (2019). Parkinson's Disease. *The Medical clinics of North America*, 103(2), 337–350. <https://doi.org/10.1016/j.mcna.2018.10.014>
- [3] Chao, Y. X., Gulam, M. Y., Chia, N., Feng, L., Rotzschke, O., & Tan, E. K. (2020). Gut-Brain Axis: Potential Factors Involved in the Pathogenesis of Parkinson's Disease. *Frontiers in neurology*, 11, 849. <https://doi.org/10.3389/fneur.2020.00849>
- [4] Peterson C. T. (2020). Dysfunction of the Microbiota-Gut-Brain Axis in Neurodegenerative Disease: The Promise of Therapeutic Modulation with Prebiotics, Medicinal Herbs, Probiotics, and Synbiotics. *Journal of evidence-based integrative medicine*, 25, 2515690X20957225. <https://doi.org/10.1177/2515690X20957225>
- [5] Sung, H. Y., Park, J. W., & Kim, J. S. (2014). The frequency and severity of gastrointestinal symptoms in patients with early Parkinson's disease. *Journal of movement disorders*, 7(1), 7–12. <https://doi.org/10.14802/jmd.14002>
- [6] Klingelhoefer, L., & Reichmann, H. (2015). Pathogenesis of Parkinson disease--the gut-brain axis and environmental factors. *Nature reviews. Neurology*, 11(11), 625–636. <https://doi.org/10.1038/nrneurol.2015.197>
- [7] Mulak, A., & Bonaz, B. (2015). Brain-gut-microbiota axis in Parkinson's disease. *World journal of gastroenterology*, 21(37), 10609–10620. <https://doi.org/10.3748/wjg.v21.i37.10609>
- [8] Keshavarzian, A., Green, S. J., Engen, P. A., Voigt, R. M., Naqib, A., Forsyth, C. B., Mutlu, E., & Shannon, K. M. (2015). Colonic bacterial composition in Parkinson's disease. *Movement disorders: official journal of the Movement Disorder Society*, 30(10), 1351–1360. <https://doi.org/10.1002/mds.26307>
- [9] Houser, M. C., & Tansey, M. G. (2017). The gut-brain axis: is intestinal inflammation a silent driver of Parkinson's disease pathogenesis. *NPJ Parkinson's disease*, 3, 3. <https://doi.org/10.1038/s41531-016-0002-0>
- [10] Zhang Y, Xu S, Qian Y. (2023). Sodium butyrate ameliorates gut dysfunction and motor deficits in a mouse model of Parkinson's disease by regulating gut microbiota [J]. *Frontiers in Aging Neuroscience*, 151099018-1099018. <https://doi.org/10.3389/FNAGI.2023.1099018>
- [11] Mulak Agata, Bonaz Bruno. (2015). Brain-gut-microbiota axis in Parkinson's disease.[J]. *World journal of gastroenterology*, 21(37), 10609-20. <https://doi.org/10.3748/wjg.v21.i37.10609>
- [12] Houser Madelyn C; Tansey Malú G. (2017). The gut-brain axis: is intestinal

- inflammation a silent driver of Parkinson's disease pathogenesis?. *NPJ Parkinson's disease*, 3(12), 3. <https://doi.org/10.1038/s41531-016-0002-0>
- [13] Nutt, J. G., Curtze, C., Hiller, A., Anderson, S., Larson, P. S., Van Laar, A. D., Richardson, R. M., Thompson, M. E., Sedkov, A., Leinonen, M., Ravina, B., Bankiewicz, K. S., & Christine, C. W. (2020). Aromatic L-Amino Acid Decarboxylase Gene Therapy Enhances Levodopa Response in Parkinson's Disease. *Movement disorders: official journal of the Movement Disorder Society*, 35(5), 851–858. <https://doi.org/10.1002/mds.27993>
- [14] Chen, L. W., Wang, Y. Q., Wei, L. C., Shi, M., & Chan, Y. S. (2007). Chinese herbs and herbal extracts for neuroprotection of dopaminergic neurons and potential therapeutic treatment of Parkinson's disease. *CNS & neurological disorders drug targets*, 6(4), 273–281. <https://doi.org/10.2174/187152707781387288>
- [15] Pérez-Hernández, J., Zaldívar-Machorro, V. J., Villanueva-Porras, D., Vega-Ávila, E., & Chavarría, A. (2016). A Potential Alternative against Neurodegenerative Diseases: Phytodrugs. *Oxidative medicine and cellular longevity*, 2016, 8378613. <https://doi.org/10.1155/2016/8378613>
- [16] Attele, A. S., Wu, J. A., & Yuan, C. S. (1999). Ginseng pharmacology: multiple constituents and multiple actions. *Biochemical pharmacology*, 58(11), 1685–1693. [https://doi.org/10.1016/s0006-2952\(99\)00212-9](https://doi.org/10.1016/s0006-2952(99)00212-9)
- [17] Kim, H. J., Kim, P., & Shin, C. Y. (2013). A comprehensive review of the therapeutic and pharmacological effects of ginseng and ginsenosides in central nervous system. *Journal of ginseng research*, 37(1), 8–29. <https://doi.org/10.5142/jgr.2013.37.8>
- [18] Gao, Q. G., Chen, W. F., Xie, J. X., & Wong, M. S. (2009). Ginsenoside Rg<sub>1</sub> protects against 6-OHDA-induced neurotoxicity in neuroblastoma SK-N-SH cells via IGF-I receptor and estrogen receptor pathways. *Journal of neurochemistry*, 109(5), 1338–1347. <https://doi.org/10.1111/j.1471-4159.2009.06051.x>
- [19] Effects of Panax ginseng in Neurodegenerative Diseases. *Journal of ginseng research*, 36(4), 342–353. <https://doi.org/10.5142/jgr.2012.36.4.342>
- [20] Van Kampen, J. M., Baranowski, D. B., Shaw, C. A., & Kay, D. G. (2014). Panax ginseng is neuroprotective in a novel progressive model of Parkinson's disease. *Experimental gerontology*, 50, 95–105. <https://doi.org/10.1016/j.exger.2013.11.012>
- [21] Li, Q., Rubin, L., Silva, M., Li, S., Yang, C., Lazarovici, P., & Zheng, W. (2022). Current Progress on Neuroprotection Induced by Artemisia, Ginseng, Astragalus, and Ginkgo Traditional Chinese Medicines for the Therapy of Alzheimer's Disease. *Oxidative medicine and cellular longevity*, 2022, 3777021. <https://doi.org/10.1155/2022/3777021>
- [22] Jiang, Y., Li, Z., Liu, Y., Liu, X., Chang, Q., Liao, Y., & Pan, R. (2015). Neuroprotective effect of water extract of Panax ginseng on corticosterone-induced apoptosis in PC12 cells and its underlying molecule mechanisms. *Journal of ethnopharmacology*, 159, 102–112. <https://doi.org/10.1016/j.jep.2014.10.062>
- [23] Van Kampen, J., Robertson, H., Hagg, T., & Drobitch, R. (2003). Neuroprotective actions of the ginseng extract G115 in two rodent models of Parkinson's disease.

- Experimental neurology, 184(1), 521–529.  
<https://doi.org/10.1016/j.expneurol.2003.08.002>
- [24] Wang, J., Sun, C., Zheng, Y., Pan, H., Zhou, Y., & Fan, Y. (2014). The effective mechanism of the polysaccharides from *Panax ginseng* on chronic fatigue syndrome. *Archives of pharmacal research*, 37(4), 530–538.  
<https://doi.org/10.1007/s12272-013-0235-y>
- [25] Jiao, L., Li, J., Liu, F., Wang, J., Jiang, P., Li, B., Li, H., Chen, C., & Wu, W. (2021). Characterisation, Chain Conformation and Antifatigue Effect of Steamed *Ginseng* Polysaccharides with Different Molecular Weight. *Frontiers in pharmacology*, 12, 712836. <https://doi.org/10.3389/fphar.2021.712836>
- [26] Wang, W., Liu, X., Liu, J., Cai, E., Zhao, Y., Li, H., Zhang, L., Li, P., & Gao, Y. (2018). Sesquiterpenoids from the Root of *Panax ginseng* Attenuates Lipopolysaccharide-Induced Depressive-Like Behavior through the Brain-Derived Neurotrophic Factor/Tropomyosin-Related Kinase B and Sirtuin Type 1/Nuclear Factor- $\kappa$ B Signaling Pathways. *Journal of agricultural and food chemistry*, 66(1), 265–271. <https://doi.org/10.1021/acs.jafc.7b04835>
- [27] Zheng, X., Zhai J., Li, H., Zhao, L., Gao, Z. (2020). Effect of ginseng polysaccharide on apoptosis in the hippocampus of rats with cerebral hemorrhage. *Chinese Journal of Difficult and Complicated Cases*, 19(04):394-398.  
<https://doi:10.3969/j.issn.1671-6450.2020.04.016>
- [28] Liu, X., Wang, L., Wen, A., Yang, J., Yan, Y., Song, Y., Liu, X., Ren, H., Wu, Y., Li, Z., Chen, W., Xu, Y., Li, L., Xia, J., & Zhao, G. (2012). Ginsenoside-Rd improves outcome of acute ischaemic stroke - a randomized, double-blind, placebo-controlled, multicenter trial. *European journal of neurology*, 19(6), 855–863.  
<https://doi.org/10.1111/j.1468-1331.2011.03634.x>
- [29] Xu, L., Chen, W. F., & Wong, M. S. (2009). Ginsenoside Rg<sub>1</sub> protects dopaminergic neurons in a rat model of Parkinson's disease through the IGF-I receptor signalling pathway. *British journal of pharmacology*, 158(3), 738–748.  
<https://doi.org/10.1111/j.1476-5381.2009.00361.x>
- [30] Chen, C., Zhang, H., Xu, H., Zheng, Y., Wu, T., & Lian, Y. (2019). Ginsenoside Rb<sub>1</sub> ameliorates cisplatin-induced learning and memory impairments. *Journal of ginseng research*, 43(4), 499–507. <https://doi.org/10.1016/j.jgr.2017.07.009>
- [31] Yang X, Dong B, An L, Zhang Q, Chen Y, Wang H. (2021). Ginsenoside Rb<sub>1</sub> ameliorates Glycemic Disorder in Mice with High Fat Diet-Induced Obesity via Regulating Gut Microbiota and Amino Acid Metabolism. *Frontiers in Pharmacology*, 12756491-756491. <https://doi.org/10.3389/FPHAR.2021.756491>
- [32] Bai X, Fu R, Duan Z, Wang P, Zhu Ch. (2021). Ginsenoside Rk<sub>3</sub> alleviates gut microbiota dysbiosis and colonic inflammation in antibiotic-treated mice. *Food Research International*, 146110465-110465.  
<https://doi.org/10.1016/J.FOODRES.2021.110465>
- [33] Li, H., Kang, T., Qi, B., Kong, L., Jiao, Y., Cao, Y., Zhang, J., & Yang, J. (2016). Neuroprotective effects of ginseng protein on PI3K/Akt signaling pathway in the hippocampus of D-galactose/AlCl<sub>3</sub> inducing rats model of Alzheimer's disease. *Journal of ethnopharmacology*, 179, 162–169.

<https://doi.org/10.1016/j.jep.2015.12.020>

- [34] Liu, M., Yu, S., Wang, J., Qiao, J., Liu, Y., Wang, S., & Zhao, Y. (2020). Ginseng protein protects against mitochondrial dysfunction and neurodegeneration by inducing mitochondrial unfolded protein response in *Drosophila melanogaster* PINK1 model of Parkinson's disease. *Journal of ethnopharmacology*, 247, 112213. <https://doi.org/10.1016/j.jep.2019.112213>
- [35] Ryu, J., Lee, H. W., Yoon, J., Seo, B., Kwon, D. E., Shin, U. M., Choi, K. J., & Lee, Y. W. (2017). Effect of hydrothermal processing on ginseng extract. *Journal of ginseng research*, 41(4), 572–577. <https://doi.org/10.1016/j.jgr.2016.12.002>
- [36] Karmazyn, M., & Gan, X. T. (2021). Chemical components of ginseng, their biotransformation products and their potential as treatment of hypertension. *Molecular and cellular biochemistry*, 476(1), 333–347. <https://doi.org/10.1007/s11010-020-03910-8>
- [37] Liu, H., Lu, X., Hu, Y., & Fan, X. (2020). Chemical constituents of *Panax ginseng* and *Panax notoginseng* explain why they differ in therapeutic efficacy. *Pharmacological research*, 161, 105263. <https://doi.org/10.1016/j.phrs.2020.105263>
- [38] Wang, C. Q., Yi, L. W., Zhao, L., Zhou, Y. Z., Guo, F., Huo, Y. S., Zhao, D. Q., Xu, F., Wang, X., & Cai, S. Q. (2021). 177 Saponins, Including 11 New Compounds in Wild Ginseng Tentatively Identified via HPLC-IT-TOF-MSn, and Differences among Wild Ginseng, Ginseng under Forest, and Cultivated Ginseng. *Molecules (Basel, Switzerland)*, 26(11), 3371. <https://doi.org/10.3390/molecules26113371>
- [39] Kim, C. J., Kim, B. M., Kim, C. S., Baek, J. Y., & Jung, I. C. (2020). Variations in Ginsenosides of Raw Ginseng According to Heating Temperature and Time. *Journal of pharmacopuncture*, 23(2), 79–87. <https://doi.org/10.3831/KPI.2020.23.012>
- [40] Li, H., Jiang, H., Xu, L., Deng, Y., Xu, J., & Zhao, Y. (2022). Effects of Different Extraction Methods in Pharmacopoeia on the Content and Structure Transformation of Ginsenosides. *Molecules*, 27(14), 4347. <https://doi.org/10.3390/molecules27144347>
- [41] Chen, W., Balan, P., & Popovich, D. G. (2020). Changes of Ginsenoside Composition in the Creation of Black Ginseng Leaf. *Molecules*, 25(12), 2809. <https://doi.org/10.3390/molecules25122809>
- [42] Potin, F., Lubbers, S., Husson, F., & Saurel, R. (2019). Hemp (*Cannabis sativa* L.) Protein Extraction Conditions Affect Extraction Yield and Protein Quality. *Journal of food science*, 84(12), 3682–3690. <https://doi.org/10.1111/1750-3841.14850>
- [43] Scepankova, H., Martins, M., Estevinho, L., Delgadillo, I., & Saraiva, J. A. (2018). Enhancement of Bioactivity of Natural Extracts by Non-Thermal High Hydrostatic Pressure Extraction. *Plant foods for human nutrition*, 73(4), 253–267. <https://doi.org/10.1007/s11130-018-0687-9>
- [44] Sarnaik, A., Mhatre, A., Faisal, M., Smith, D., Davis, R., & Varman, A. M. (2021). Novel perspective on a conventional technique: Impact of ultra-low temperature on bacterial viability and protein extraction. *PloS one*, 16(5), e0251640. <https://doi.org/10.1371/journal.pone.0251640>

- [45] Zhao, J. L., Zhang, M., & Zhou, H. L. (2019). Microwave-Assisted Extraction, Purification, Partial Characterization, and Bioactivity of Polysaccharides from *Panax ginseng*. *Molecules* (Basel, Switzerland), 24(8), 1605. <https://doi.org/10.3390/molecules24081605>
- [46] Ru, W., Wang, D., Xu, Y., He, X., Sun, Y. E., Qian, L., Zhou, X., & Qin, Y. (2015). Chemical constituents and bioactivities of *Panax ginseng* (C. A. Mey.). *Drug discoveries & therapeutics*, 9(1), 23–32. <https://doi.org/10.5582/ddt.2015.01004>
- [47] Zhao, B., Lv, C., & Lu, J. (2019). Natural occurring polysaccharides from *Panax ginseng* C. A. Meyer: A review of isolation, structures, and bioactivities. *International journal of biological macromolecules*, 133, 324–336. <https://doi.org/10.1016/j.ijbiomac.2019.03.229>
- [48] Bhurtel, S., Bok, E., Katila, N., Kim, J., & Choi, D. Y. (2021). Activation of Nrf2 by methylene blue is associated with the neuroprotection against MPP+ induced toxicity via ameliorating oxidative stress and mitochondrial dysfunction. *Biochemical pharmacology*, 192, 114719. <https://doi.org/10.1016/j.bcp.2021.114719>
- [49] Morissette, M., Morin, N., Grégoire, L., Rajput, A., Rajput, A. H., & Di Paolo, T. (2016). Brain  $\alpha 7$  nicotinic acetylcholine receptors in MPTP-lesioned monkeys and parkinsonian patients. *Biochemical pharmacology*, 109, 62–69. <https://doi.org/10.1016/j.bcp.2016.03.023>
- [50] Tranchant C. (2019). Introduction and classical environmental risk factors for Parkinson. *Revue neurologique*, 175(10), 650–651. <https://doi.org/10.1016/j.neurol.2019.04.006>
- [51] Liu, Y., Zong, X., Huang, J., Guan, Y., Li, Y., Du, T., Liu, K., Kang, X., Dou, C., Sun, X., Wu, R., Wen, L., & Zhang, Y. (2019). Ginsenoside Rb1 regulates prefrontal cortical GABAergic transmission in MPTP-treated mice. *Aging*, 11(14), 5008–5034. <https://doi.org/10.18632/aging.102095>
- [52] Sasikumar, S., & Strafella, A. P. (2020). Imaging Mild Cognitive Impairment and Dementia in Parkinson's Disease. *Frontiers in neurology*, 11, 47. <https://doi.org/10.3389/fneur.2020.00047>
- [53] Orgeta, V., McDonald, K. R., Poliakoff, E., Hindle, J. V., Clare, L., & Leroi, I. (2020). Cognitive training interventions for dementia and mild cognitive impairment in Parkinson's disease. *The Cochrane database of systematic reviews*, 2(2), CD011961. <https://doi.org/10.1002/14651858.CD011961.pub2>
- [54] Christopher, L., Marras, C., Duff-Canning, S., Koshimori, Y., Chen, R., Boileau, I., Segura, B., Monchi, O., Lang, A. E., Rusjan, P., Houle, S., & Strafella, A. P. (2014). Combined insular and striatal dopamine dysfunction are associated with executive deficits in Parkinson's disease with mild cognitive impairment. *Brain: a journal of neurology*, 137(Pt 2), 565–575. <https://doi.org/10.1093/brain/awt337>
- [55] Braak, H., de Vos, R. A., Bohl, J., & Del Tredici, K. (2006). Gastric alpha-synuclein immunoreactive inclusions in Meissner's and Auerbach's plexuses in cases staged for Parkinson's disease-related brain pathology. *Neuroscience letters*, 396(1), 67–72. <https://doi.org/10.1016/j.neulet.2005.11.012>
- [56] Pont-Sunyer, C., Hotter, A., Gaig, C., Seppi, K., Compta, Y., Katzenschlager, R.,

- Mas, N., Hofeneder, D., Brücke, T., Bayés, A., Wenzel, K., Infante, J., Zach, H., Pirker, W., Posada, I. J., Álvarez, R., Ispierto, L., De Fàbregues, O., Callén, A., Palasí, A., ... Tolosa, E. (2015). The onset of nonmotor symptoms in Parkinson's disease (the ONSET PD study). *Movement disorders: official journal of the Movement Disorder Society*, 30(2), 229–237. <https://doi.org/10.1002/mds.26077>
- [57] Pflibsen, L., Stang, K. A., Sconce, M. D., Wilson, V. B., Hood, R. L., Meshul, C. K., & Mitchell, S. H. (2015). Executive function deficits and glutamatergic protein alterations in a progressive 1-methyl-4-phenyl-1,2,3,6-tetrahydropyridine mouse model of Parkinson's disease. *Journal of neuroscience research*, 93(12), 1849–1864. <https://doi.org/10.1002/jnr.23638>
- [58] Durand, E., Petit, O., Tremblay, L., Zimmer, C., Sgambato-Faure, V., Chassain, C., Laurent, M., Pereira, B., Silberberg, C., & Durif, F. (2015). Social behavioral changes in MPTP-treated monkey model of Parkinson's disease. *Frontiers in behavioral neuroscience*, 9, 42. <https://doi.org/10.3389/fnbeh.2015.00042>
- [59] Lai, F., Jiang, R., Xie, W., Liu, X., Tang, Y., Xiao, H., Gao, J., Jia, Y., & Bai, Q. (2018). Intestinal Pathology and Gut Microbiota Alterations in a Methyl-4-phenyl-1,2,3,6-tetrahydropyridine (MPTP) Mouse Model of Parkinson's Disease. *Neurochemical research*, 43(10), 1986–1999. <https://doi.org/10.1007/s11064-018-2620-x>
- [60] Maiti, P., Gregg, L. C., & McDonald, M. P. (2016). MPTP-induced executive dysfunction is associated with altered prefrontal serotonergic function. *Behavioural brain research*, 298(Pt B), 192–201. <https://doi.org/10.1016/j.bbr.2015.09.014>
- [61] Dehay, B., Bourdenx, M., Gorry, P., Przedborski, S., Vila, M., Hunot, S., Singleton, A., Olanow, C. W., Merchant, K. M., Bezard, E., Petsko, G. A., & Meissner, W. G. (2015). Targeting  $\alpha$ -synuclein for treatment of Parkinson's disease: mechanistic and therapeutic considerations. *The Lancet. Neurology*, 14(8), 855–866. [https://doi.org/10.1016/S1474-4422\(15\)00006-X](https://doi.org/10.1016/S1474-4422(15)00006-X)
- [62] Zhang, G., Xia, F., Zhang, Y., Zhang, X., Cao, Y., Wang, L., Liu, X., Zhao, G., & Shi, M. (2016). Ginsenoside Rd Is Efficacious Against Acute Ischemic Stroke by Suppressing Microglial Proteasome-Mediated Inflammation. *Molecular neurobiology*, 53(4), 2529–2540. <https://doi.org/10.1007/s12035-015-9261-8>
- [63] Nagatsu, T., Nakashima, A., Watanabe, H., Ito, S., & Wakamatsu, K. (2022). Neuromelanin in Parkinson's Disease: Tyrosine Hydroxylase and Tyrosinase. *International journal of molecular sciences*, 23(8), 4176. <https://doi.org/10.3390/ijms23084176>
- [64] Choi, J. H., Jang, M., Oh, S., Nah, S. Y., & Cho, I. H. (2018). Multi-Target Protective Effects of Gintonin in 1-Methyl-4-phenyl-1,2,3,6-tetrahydropyridine-Mediated Model of Parkinson's Disease via Lysophosphatidic Acid Receptors. *Frontiers in pharmacology*, 9, 515. <https://doi.org/10.3389/fphar.2018.00515>
- [65] Sampson, T. R., Debelius, J. W., Thron, T., Janssen, S., Shastri, G. G., Ilhan, Z. E., Challis, C., Schretter, C. E., Rocha, S., Gradinaru, V., Chesselet, M. F., Keshavarzian, A., Shannon, K. M., Krajmalnik-Brown, R., Wittung-Stafshede, P., Knight, R., & Mazmanian, S. K. (2016). Gut Microbiota Regulate Motor Deficits and Neuroinflammation in a Model of Parkinson's Disease. *Cell*, 167(6), 1469–

1480.e12. <https://doi.org/10.1016/j.cell.2016.11.018>

- [66] Gorecki, A. M., Preskey, L., Bakeberg, M. C., Kenna, J. E., Gildenhuis, C., MacDougall, G., Dunlop, S. A., Mastaglia, F. L., Akkari, P. A., Koengten, F., & Anderton, R. S. (2019). Altered Gut Microbiome in Parkinson's Disease and the Influence of Lipopolysaccharide in a Human  $\alpha$ -Synuclein Over-Expressing Mouse Model. *Frontiers in neuroscience*, 13, 839. <https://doi.org/10.3389/fnins.2019.00839>
- [67] Unger, M. M., Spiegel, J., Dillmann, K. U., Grundmann, D., Philippeit, H., Bürmann, J., Faßbender, K., Schwartz, A., & Schäfer, K. H. (2016). Short chain fatty acids and gut microbiota differ between patients with Parkinson's disease and age-matched controls. *Parkinsonism & related disorders*, 32, 66–72. <https://doi.org/10.1016/j.parkreldis.2016.08.019>
- [68] Vendrik, K., Ooijevaar, R. E., de Jong, P., Laman, J. D., van Oosten, B. W., van Hilten, J. J., Ducarmon, Q. R., Keller, J. J., Kuijper, E. J., & Contarino, M. F. (2020). Fecal Microbiota Transplantation in Neurological Disorders. *Frontiers in cellular and infection microbiology*, 10, 98. <https://doi.org/10.3389/fcimb.2020.00098>
- [69] Sun, M. F., Zhu, Y. L., Zhou, Z. L., Jia, X. B., Xu, Y. D., Yang, Q., Cui, C., & Shen, Y. Q. (2018). Neuroprotective effects of fecal microbiota transplantation on MPTP-induced Parkinson's disease mice: Gut microbiota, glial reaction and TLR4/TNF- $\alpha$  signaling pathway. *Brain, behavior, and immunity*, 70, 48–60. <https://doi.org/10.1016/j.bbi.2018.02.005>
- [70] Jang, J. H., Yeom, M. J., Ahn, S., Oh, J. Y., Ji, S., Kim, T. H., & Park, H. J. (2020). Acupuncture inhibits neuroinflammation and gut microbial dysbiosis in a mouse model of Parkinson's disease. *Brain, behavior, and immunity*, 89, 641–655. <https://doi.org/10.1016/j.bbi.2020.08.015>
- [71] Zhang, J., Guo, Z., Xue, Z., Sun, Z., Zhang, M., Wang, L., Wang, G., Wang, F., Xu, J., Cao, H., Xu, H., Lv, Q., Zhong, Z., Chen, Y., Qimuge, S., Menghe, B., Zheng, Y., Zhao, L., Chen, W., & Zhang, H. (2015). A phylo-functional core of gut microbiota in healthy young Chinese cohorts across lifestyles, geography and ethnicities. *The ISME journal*, 9(9), 1979–1990. <https://doi.org/10.1038/ismej.2015.11>
- [72] Wang, L., Zhao, Z., Zhao, L., Zhao, Y., Yang, G., Wang, C., Gao, L., Niu, C., & Li, S. (2022). Lactobacillus plantarum DP189 Reduces  $\alpha$ -SYN Aggravation in MPTP-Induced Parkinson's Disease Mice via Regulating Oxidative Damage, Inflammation, and Gut Microbiota Disorder. *Journal of agricultural and food chemistry*, 70(4), 1163–1173. <https://doi.org/10.1021/acs.jafc.1c07711>
- [73] Fu, S. K., Tseng, W. C., Tseng, K. W., Lai, C. C., Tsai, Y. C., Tai, H. L., & Hsu, C. C. (2021). Effect of Daily Oral Lactobacillus plantarum PS128 on Exercise Capacity Recovery after a Half-Marathon. *Nutrients*, 13(11), 4023. <https://doi.org/10.3390/nu13114023>

**Ref: Submission ID PONE-D-23-02610**

## **REVIEWER REPORTS**

### **Reviewer Comments:**

#### **Reviewer 1**

In this study the authors used a low-temperature extraction technique to obtain WEG with high retention of active ingredients. The authors demonstrated that WEG could repair intestinal damage and improve gut microbiota dysbiosis in PD mice. The authors also demonstrated that WEG could significantly improve behavioral functions and inhibit the accumulation of  $\alpha$ -Syn in the brain via regulating the level of TH in the brain, thus exerting neuroprotective effects in PD mice.

This study provides a new approach to the pharmacological treatment of PD, further supports the hypothesis that the pathogenesis of PD is related to the gut, and offers a research basis for whether WEG may be a suitable treatment for other degenerative diseases.

#### **Reviewer 2**

In this study, they explored the neuroprotective effects of water extract of ginseng (WEG) on the brains of Parkinson's disease (PD) mice and its ability to improve their damaged intestinal system, addressing dyskinesia. Their data showed that WEG protected damaged neuronal cells, inhibited  $\alpha$ -synuclein aggregation, and increased tyrosine hydroxylase expression in the mice's brains. WEG also significantly improved intestinal damage, regulated gut disorders, increased beneficial bacteria like *Lactobacillus*, and restored bacterial abundance and diversity. Overall, WEG protected neurons in PD mice's brains, regulated gut microbiota, improved behavioral disorders, and offered therapeutic effects for PD mice.

The article has some innovativeness but has the following issues:

#### **Comment 1:**

The authors included an analysis of the gut microbiome as an indicator when exploring the neuroprotective effects of WEG on PD, and indeed, the relationship between gut microbiome and PD is a new and broad research direction. However, the authors did not explicitly state the reason for including the gut microbiome analysis in the introduction. In fact, this indicator makes the article appear loose and unfocused. It is confusing whether WEG protects neurons because of its effects on the gut microbiome, or if it affects the gut microbiome because of its neuroprotective properties. It would be better to directly analyze the mechanisms affecting neurons instead.

#### **Authors' responses:**

We have included the following in the introduction by reviewing references [10-12] and [31-32].

The latest research has found that PD may originate in the intestines. Since abnormal



$\alpha$ -Syn first appears in intestinal neurons before the onset of PD, intestinal dysbacteriosis is most likely related to the onset of PD disease [10]. Intestinal microorganisms act on the central nervous system through metabolites, neurotransmitters and cytokines secreted by immune cells, regulating brain-gut axis interactions [11], and the imbalance of the gut microbiota of Parkinson's patients may lead to  $\alpha$ -Syn misfolding, from the intestinal nerves to the brain and brainstem, which in turn leads to brain dopaminergic neuronal damage [12].

At the same time, ginsenosides also have a potential therapeutic effect on intestinal microbiota dysbiosis. Ginsenoside Rb1 significantly changed the composition of gut microbiota in hyperglycemic mice and increased the abundance of mucin-degrading bacteria *Akkermansia* spp. [31]. Ginsenoside Rk3 intake caused significant changes in the intestinal flora of mice, enriching *Bacteroides*, *Alloprevotella* and *Blautia*, significantly reducing the Firmicutes/Bacteroidetes ratio, effectively improving intestinal dysbacteriosis and reducing the inflammatory response of mice [32].

[10]Zhang Y, Xu S, Qian Y. (2023). Sodium butyrate ameliorates gut dysfunction and motor deficits in a mouse model of Parkinson's disease by regulating gut microbiota [J]. *Frontiers in Aging Neuroscience*, 151099018-1099018. <https://doi.org/10.3389/FNAGI.2023.1099018>

[11]Mulak Agata, Bonaz Bruno. (2015). Brain-gut-microbiota axis in Parkinson's disease.[J]. *World journal of gastroenterology*, 21(37), 10609-20. <https://doi.org/10.3748/wjg.v21.i37.10609>

[12]Houser Madelyn C; Tansey Malú G. (2017). The gut-brain axis: is intestinal inflammation a silent driver of Parkinson's disease pathogenesis?. *NPJ Parkinson's disease*, 3(12), 3. <https://doi.org/10.1038/s41531-016-0002-0>

[31]Yang X, Dong B, An L, Zhang Q, Chen Y, Wang H. (2021). Ginsenoside Rb1 ameliorates Glycemic Disorder in Mice with High Fat Diet-Induced Obesity via Regulating Gut Microbiota and Amino Acid Metabolism. *Frontiers in Pharmacology*, 12756491-756491. <https://doi.org/10.3389/FPHAR.2021.756491>

[32]Bai X, Fu R, Duan Z, Wang P, Zhu Ch. (2021). Ginsenoside Rk3 alleviates gut microbiota dysbiosis and colonic inflammation in antibiotic-treated mice. *Food Research International*, 146110465-110465. <https://doi.org/10.1016/J.FOODRES.2021.110465>

## **Comment 2:**

What are the specific doses of WEG in the low, middle, and high groups in the article, and what is the basis for these doses? The article mentions oral administration of WEG from day 28 to 56. How was this application period determined? In pharmacological experiments, the establishment of dosage and timing requires sufficient justification.

## **Authors' responses:**

According to the records in *Pharmacopoeia of the People's Republic of China 2020*, the daily oral dose of ginseng for human should be 3–9 g, and the corresponding administration groups of mice were categorized into low (0.013g/kg body weight per day), middle (0.026g/kg body weight per day), and high groups (0.039g/kg body weight per day). The MPTP-induced chronic injury model is more consistent with Parkinson's disease, and it takes frequent, high-dose injections of MPTP to induce a large amount

of DA deficiency in mice, but this deficiency is usually reversed within 3-6 months. We rationalized the modeling time to 28 days based on the pre-experiment after consulting the literature, and since DA deficits may be reversed at 3-6 months, we aligned the drug administration time with the modeling time to ensure that the experimental improvement originated from the drug and not from automatic recovery of DA in the organism.

**Comment 3:**

In Figure 6, the IHC staining of WEG is shown at x400 magnification, which is quite large. Are there images available at x100 or x50 magnification? This would provide clearer comparisons.

**Authors' responses:**

We have changed Figures 5 and 6 to x200x images to ensure that the images were taken from the same location and can be compared more clearly.

**Comment 4:**

Please consider streamlining the article, particularly the introduction and discussion sections. Any redundant content can be removed.

**Authors' responses:**

We have revised the introductory section and marked the changes in yellow.

**Reviewer 3**

The study focused on the neuroprotective effects of water extract of ginseng (WEG) on a mouse model of Parkinson's Disease (PD) induced by MPTP (1-methyl-4-phenyl-1,2,3,6-tetrahydropyridine). The authors presented significant results indicating that WEG could ameliorate MPTP-induced PD-like symptoms, improve intestinal damage, reduce  $\alpha$ -Syn accumulation, increase TH level, and rectify gut microbiota dysbiosis. The study provides valuable insights into the potential of WEG as a pharmacological treatment for PD. However, several points could be further clarified or improved.

**Comment 1:**

The authors mentioned that WEG extraction was performed under mild conditions of low temperature and water extraction. It would be interesting to compare these results with those obtained under different conditions. More discussion on the extraction technique might enhance the understanding of the effects of extraction conditions on the efficacy of WEG.

**Authors' responses:**

We appreciate the reviewers' comment, but the discussion of our manuscript focuses on the pathological study of WEG to improve PD mice. For different extraction conditions is not the main statement of this manuscript.

**Comment 2:**

Although the authors suggest that WEG plays a role in resisting PD progression, the exact mechanisms by which WEG exerts its effects are not completely elucidated. Further exploration of this could provide a more detailed understanding of the

mechanisms underlying the effects of WEG.

**Authors' responses:**

We thank the reviewers for their comments on the mechanism by which WEG exerts its effect, which is what we are most interested in in the research work of this paper. We have several speculations about this, which are also likely to be the focus of our research in the next work plan.

- 1) WEG ameliorates the pathogenesis of PD by repressing certain mitochondrial apoptosis-related genes.
- 2) Anti-oxidant effect: WEG may inhibit the levels of certain pro-oxidant factors, thus acting as a neuroprotective agent in the brain.
- 3) Gene-level effects: PD occurs as a result of multi-gene, multi-step, mutations, and mutations in different genes with different intensities form different tumors. The addition of WEG may have altered the structure of DNA, the genetic material of mice brain nerve cells, reversing the genetic characteristics of brain nerve cells and thus exerting an inhibitory effect on parkinsonism.

**Comment 3:**

It was mentioned that the high dose of WEG improved PD and also affected the gut microbiota of the mice. More information or discussion on the correlation between dosage and effects would be beneficial.

**Authors' responses:**

We discussed this and revised the manuscript.

**Comment 4:**

For figure 5 and figure 6, a low magnification overview is needed for the structure of the brain to ensure the zoom in image was taken from the same location.

**Authors' responses:**

We have changed Figures 5 and 6 to x200x images to ensure that the images were taken from the same location and can be compared more clearly.

**Comment 5:**

For figure 7B, what's the top band of GAPDH? GAPDH should only have one band.

**Authors' responses:**

The GAPDH primary antibody has been reselected in Figure 7B. We have modified the figure 7B.
